# Supplementary material for: Exploring Mouse Protein Function via Multiple Approaches
Source: PLoS One. 2016 Nov 15;11(11):e0166580. doi: 10.1371/journal.pone.0166580 (PMC5112993; doi:10.1371/journal.pone.0166580)
Supplement: S2 Table — Proteins with "wrong" 1st-order function predictions but "right" 2nd-order function predictions in our dataset were called "false-wrong" 1st-order predicted proteins. There were 658 such proteins based on the similarity-based approach, 258 based on the interaction-based approach and 50 based on the PseAAC-based approach. These proteins are listed on three separate sheets. The proteins may possess the function indicated by the 1st-order prediction and are worthwhile subjects for future analysis. (XLSX) [file pone.0166580.s002.xlsx]

## Sheet: similarity-based approach
mc	functions	1st prediction	1st score	1st flag	2nd prediction	2nd score	2nd flag
mc18001309	CELL CYCLE AND DNA PROCESSING;SUBCELLULAR LOCALIZATION	PROTEIN WITH BINDING FUNCTION OR COFACTOR REQUIREMENT (structural or catalytic)	38941	0	SUBCELLULAR LOCALIZATION	37861	1
mc7000273	METABOLISM;PROTEIN WITH BINDING FUNCTION OR COFACTOR REQUIREMENT (structural or catalytic)	PROTEIN FATE (folding modification destination)	33386	0	PROTEIN WITH BINDING FUNCTION OR COFACTOR REQUIREMENT (structural or catalytic)	33072	1
mc2002067	PROTEIN WITH BINDING FUNCTION OR COFACTOR REQUIREMENT (structural or catalytic);CELLULAR COMMUNICATION/SIGNAL TRANSDUCTION MECHANISM;SUBCELLULAR LOCALIZATION	PROTEIN FATE (folding modification destination)	32722	0	PROTEIN WITH BINDING FUNCTION OR COFACTOR REQUIREMENT (structural or catalytic)	31543	1
mc7001424	METABOLISM;PROTEIN WITH BINDING FUNCTION OR COFACTOR REQUIREMENT (structural or catalytic);CELLULAR COMMUNICATION/SIGNAL TRANSDUCTION MECHANISM;CELL TYPE DIFFERENTIATION;SUBCELLULAR LOCALIZATION	PROTEIN FATE (folding modification destination)	31210	0	PROTEIN WITH BINDING FUNCTION OR COFACTOR REQUIREMENT (structural or catalytic)	30066	1
mc17001082	METABOLISM;PROTEIN FATE (folding modification destination);CELLULAR COMMUNICATION/SIGNAL TRANSDUCTION MECHANISM;INTERACTION WITH THE ENVIRONMENT;DEVELOPMENT (Systemic);TISSUE DIFFERENTIATION;SUBCELLULAR LOCALIZATION	PROTEIN WITH BINDING FUNCTION OR COFACTOR REQUIREMENT (structural or catalytic)	30339	0	PROTEIN FATE (folding modification destination)	28244	1
mc15000840	METABOLISM;PROTEIN WITH BINDING FUNCTION OR COFACTOR REQUIREMENT (structural or catalytic)	PROTEIN FATE (folding modification destination)	28794	0	PROTEIN WITH BINDING FUNCTION OR COFACTOR REQUIREMENT (structural or catalytic)	27807	1
mc1000925	TRANSCRIPTION;SUBCELLULAR LOCALIZATION	PROTEIN WITH BINDING FUNCTION OR COFACTOR REQUIREMENT (structural or catalytic)	28321	0	SUBCELLULAR LOCALIZATION	27499	1
mc6000496	PROTEIN WITH BINDING FUNCTION OR COFACTOR REQUIREMENT (structural or catalytic);REGULATION OF METABOLISM AND PROTEIN FUNCTION;CELLULAR COMMUNICATION/SIGNAL TRANSDUCTION MECHANISM;SUBCELLULAR LOCALIZATION	PROTEIN FATE (folding modification destination)	26944	0	PROTEIN WITH BINDING FUNCTION OR COFACTOR REQUIREMENT (structural or catalytic)	25965	1
mc1000962	METABOLISM;PROTEIN FATE (folding modification destination);SUBCELLULAR LOCALIZATION	PROTEIN WITH BINDING FUNCTION OR COFACTOR REQUIREMENT (structural or catalytic)	26796	0	PROTEIN FATE (folding modification destination)	25068	1
mc2002751	TRANSCRIPTION;CELL FATE;SUBCELLULAR LOCALIZATION	PROTEIN WITH BINDING FUNCTION OR COFACTOR REQUIREMENT (structural or catalytic)	25623	0	SUBCELLULAR LOCALIZATION	24706	1
mc11001586	PROTEIN WITH BINDING FUNCTION OR COFACTOR REQUIREMENT (structural or catalytic);CELLULAR COMMUNICATION/SIGNAL TRANSDUCTION MECHANISM;SUBCELLULAR LOCALIZATION	PROTEIN FATE (folding modification destination)	19227	0	PROTEIN WITH BINDING FUNCTION OR COFACTOR REQUIREMENT (structural or catalytic)	18451	1
mc14000439	PROTEIN WITH BINDING FUNCTION OR COFACTOR REQUIREMENT (structural or catalytic);CELLULAR COMMUNICATION/SIGNAL TRANSDUCTION MECHANISM;SUBCELLULAR LOCALIZATION	PROTEIN FATE (folding modification destination)	18324	0	PROTEIN WITH BINDING FUNCTION OR COFACTOR REQUIREMENT (structural or catalytic)	17726	1
mc11000874	INTERACTION WITH THE ENVIRONMENT;ORGAN DIFFERENTIATION;SUBCELLULAR LOCALIZATION	PROTEIN WITH BINDING FUNCTION OR COFACTOR REQUIREMENT (structural or catalytic)	15467	0	SUBCELLULAR LOCALIZATION	14321	1
mc18000585	INTERACTION WITH THE ENVIRONMENT;SUBCELLULAR LOCALIZATION	PROTEIN WITH BINDING FUNCTION OR COFACTOR REQUIREMENT (structural or catalytic)	14393	0	INTERACTION WITH THE ENVIRONMENT	11103	1
mc11002342	METABOLISM;PROTEIN WITH BINDING FUNCTION OR COFACTOR REQUIREMENT (structural or catalytic)	PROTEIN FATE (folding modification destination)	14158	0	PROTEIN WITH BINDING FUNCTION OR COFACTOR REQUIREMENT (structural or catalytic)	13608	1
mc17000153	CELL CYCLE AND DNA PROCESSING;PROTEIN WITH BINDING FUNCTION OR COFACTOR REQUIREMENT (structural or catalytic);SYSTEMIC INTERACTION WITH THE ENVIRONMENT;CELL FATE;SUBCELLULAR LOCALIZATION;TISSUE LOCALIZATION	PROTEIN FATE (folding modification destination)	13915	0	SUBCELLULAR LOCALIZATION	9585	1
mc18000495	INTERACTION WITH THE ENVIRONMENT;TISSUE DIFFERENTIATION;SUBCELLULAR LOCALIZATION;TISSUE LOCALIZATION	PROTEIN WITH BINDING FUNCTION OR COFACTOR REQUIREMENT (structural or catalytic)	13901	0	INTERACTION WITH THE ENVIRONMENT	11638	1
mc10000853	PROTEIN FATE (folding modification destination);BIOGENESIS OF CELLULAR COMPONENTS;SUBCELLULAR LOCALIZATION	PROTEIN WITH BINDING FUNCTION OR COFACTOR REQUIREMENT (structural or catalytic)	13119	0	SUBCELLULAR LOCALIZATION	11772	1
mc10000856	PROTEIN FATE (folding modification destination);BIOGENESIS OF CELLULAR COMPONENTS;SUBCELLULAR LOCALIZATION	PROTEIN WITH BINDING FUNCTION OR COFACTOR REQUIREMENT (structural or catalytic)	13063	0	SUBCELLULAR LOCALIZATION	11736	1
mc2000415	METABOLISM;PROTEIN WITH BINDING FUNCTION OR COFACTOR REQUIREMENT (structural or catalytic)	PROTEIN FATE (folding modification destination)	13057	0	PROTEIN WITH BINDING FUNCTION OR COFACTOR REQUIREMENT (structural or catalytic)	12423	1
mc14001276	INTERACTION WITH THE ENVIRONMENT;ORGAN DIFFERENTIATION;SUBCELLULAR LOCALIZATION;ORGAN LOCALIZATION	PROTEIN WITH BINDING FUNCTION OR COFACTOR REQUIREMENT (structural or catalytic)	12973	0	INTERACTION WITH THE ENVIRONMENT	11171	1
mc11001179	ENERGY;INTERACTION WITH THE ENVIRONMENT;SYSTEMIC INTERACTION WITH THE ENVIRONMENT;DEVELOPMENT (Systemic);BIOGENESIS OF CELLULAR COMPONENTS;TISSUE DIFFERENTIATION;SUBCELLULAR LOCALIZATION;TISSUE LOCALIZATION	PROTEIN WITH BINDING FUNCTION OR COFACTOR REQUIREMENT (structural or catalytic)	11924	0	SUBCELLULAR LOCALIZATION	11847	1
mc5002204	PROTEIN WITH BINDING FUNCTION OR COFACTOR REQUIREMENT (structural or catalytic);INTERACTION WITH THE ENVIRONMENT	SUBCELLULAR LOCALIZATION	11083	0	PROTEIN WITH BINDING FUNCTION OR COFACTOR REQUIREMENT (structural or catalytic)	8861	1
mc19000778	CELLULAR COMMUNICATION/SIGNAL TRANSDUCTION MECHANISM;CELL FATE;SUBCELLULAR LOCALIZATION	PROTEIN WITH BINDING FUNCTION OR COFACTOR REQUIREMENT (structural or catalytic)	10016	0	SUBCELLULAR LOCALIZATION	6825	1
mc7000874	SUBCELLULAR LOCALIZATION	PROTEIN FATE (folding modification destination)	9987	0	SUBCELLULAR LOCALIZATION	7143	1
mc15001663	BIOGENESIS OF CELLULAR COMPONENTS;SUBCELLULAR LOCALIZATION	PROTEIN WITH BINDING FUNCTION OR COFACTOR REQUIREMENT (structural or catalytic)	9944	0	BIOGENESIS OF CELLULAR COMPONENTS	9630	1
mc9001073	METABOLISM;TRANSCRIPTION;PROTEIN FATE (folding modification destination);PROTEIN WITH BINDING FUNCTION OR COFACTOR REQUIREMENT (structural or catalytic);CELLULAR COMMUNICATION/SIGNAL TRANSDUCTION MECHANISM;INTERACTION WITH THE ENVIRONMENT;DEVELOPMENT (Systemic)	SUBCELLULAR LOCALIZATION	9939	0	PROTEIN WITH BINDING FUNCTION OR COFACTOR REQUIREMENT (structural or catalytic)	6866	1
mc1001206	TRANSCRIPTION;PROTEIN WITH BINDING FUNCTION OR COFACTOR REQUIREMENT (structural or catalytic);DEVELOPMENT (Systemic);ORGAN LOCALIZATION	SUBCELLULAR LOCALIZATION	9362	0	PROTEIN WITH BINDING FUNCTION OR COFACTOR REQUIREMENT (structural or catalytic)	9215	1
mc11000118	PROTEIN WITH BINDING FUNCTION OR COFACTOR REQUIREMENT (structural or catalytic)	SUBCELLULAR LOCALIZATION	9346	0	PROTEIN WITH BINDING FUNCTION OR COFACTOR REQUIREMENT (structural or catalytic)	8612	1
mc5002332	TRANSCRIPTION;DEVELOPMENT (Systemic);ORGAN DIFFERENTIATION;SUBCELLULAR LOCALIZATION;ORGAN LOCALIZATION	PROTEIN WITH BINDING FUNCTION OR COFACTOR REQUIREMENT (structural or catalytic)	8993	0	SUBCELLULAR LOCALIZATION	8981	1
mc9000416	PROTEIN FATE (folding modification destination);SUBCELLULAR LOCALIZATION	PROTEIN WITH BINDING FUNCTION OR COFACTOR REQUIREMENT (structural or catalytic)	8925	0	SUBCELLULAR LOCALIZATION	8506	1
mc8001799	PROTEIN FATE (folding modification destination);PROTEIN WITH BINDING FUNCTION OR COFACTOR REQUIREMENT (structural or catalytic)	SUBCELLULAR LOCALIZATION	8374	0	PROTEIN WITH BINDING FUNCTION OR COFACTOR REQUIREMENT (structural or catalytic)	7988	1
mc2000538	PROTEIN WITH BINDING FUNCTION OR COFACTOR REQUIREMENT (structural or catalytic)	SUBCELLULAR LOCALIZATION	8247	0	PROTEIN WITH BINDING FUNCTION OR COFACTOR REQUIREMENT (structural or catalytic)	7497	1
mc8000345	TRANSCRIPTION;PROTEIN WITH BINDING FUNCTION OR COFACTOR REQUIREMENT (structural or catalytic)	SUBCELLULAR LOCALIZATION	8193	0	PROTEIN WITH BINDING FUNCTION OR COFACTOR REQUIREMENT (structural or catalytic)	8091	1
mc2000159	PROTEIN WITH BINDING FUNCTION OR COFACTOR REQUIREMENT (structural or catalytic);CELLULAR TRANSPORT TRANSPORT FACILITIES AND TRANSPORT ROUTES;SYSTEMIC INTERACTION WITH THE ENVIRONMENT;TISSUE LOCALIZATION	SUBCELLULAR LOCALIZATION	7591	0	PROTEIN WITH BINDING FUNCTION OR COFACTOR REQUIREMENT (structural or catalytic)	6523	1
mc2002597	TRANSCRIPTION;DEVELOPMENT (Systemic);ORGAN DIFFERENTIATION;SUBCELLULAR LOCALIZATION	PROTEIN WITH BINDING FUNCTION OR COFACTOR REQUIREMENT (structural or catalytic)	7574	0	SUBCELLULAR LOCALIZATION	7549	1
mc8001713	PROTEIN WITH BINDING FUNCTION OR COFACTOR REQUIREMENT (structural or catalytic);INTERACTION WITH THE ENVIRONMENT;CELL TYPE DIFFERENTIATION;SUBCELLULAR LOCALIZATION	PROTEIN FATE (folding modification destination)	7114	0	SUBCELLULAR LOCALIZATION	5057	1
mc15000319	SUBCELLULAR LOCALIZATION	PROTEIN WITH BINDING FUNCTION OR COFACTOR REQUIREMENT (structural or catalytic)	7088	0	SUBCELLULAR LOCALIZATION	6981	1
mc4002396	BIOGENESIS OF CELLULAR COMPONENTS;SUBCELLULAR LOCALIZATION	PROTEIN WITH BINDING FUNCTION OR COFACTOR REQUIREMENT (structural or catalytic)	6632	0	SUBCELLULAR LOCALIZATION	4676	1
mc11002075	BIOGENESIS OF CELLULAR COMPONENTS;SUBCELLULAR LOCALIZATION	PROTEIN WITH BINDING FUNCTION OR COFACTOR REQUIREMENT (structural or catalytic)	6581	0	BIOGENESIS OF CELLULAR COMPONENTS	6206	1
mc10001645	CELLULAR COMMUNICATION/SIGNAL TRANSDUCTION MECHANISM	SUBCELLULAR LOCALIZATION	6573	0	CELLULAR COMMUNICATION/SIGNAL TRANSDUCTION MECHANISM	3447	1
mc11002082	PROTEIN WITH BINDING FUNCTION OR COFACTOR REQUIREMENT (structural or catalytic);SUBCELLULAR LOCALIZATION	BIOGENESIS OF CELLULAR COMPONENTS	6406	0	PROTEIN WITH BINDING FUNCTION OR COFACTOR REQUIREMENT (structural or catalytic)	6315	1
mc7000583	CELLULAR TRANSPORT TRANSPORT FACILITIES AND TRANSPORT ROUTES;CELLULAR COMMUNICATION/SIGNAL TRANSDUCTION MECHANISM;SYSTEMIC INTERACTION WITH THE ENVIRONMENT;SUBCELLULAR LOCALIZATION	PROTEIN WITH BINDING FUNCTION OR COFACTOR REQUIREMENT (structural or catalytic)	6405	0	CELLULAR TRANSPORT TRANSPORT FACILITIES AND TRANSPORT ROUTES	6308	1
mc3000889	CELLULAR COMMUNICATION/SIGNAL TRANSDUCTION MECHANISM;BIOGENESIS OF CELLULAR COMPONENTS;ORGAN DIFFERENTIATION	SUBCELLULAR LOCALIZATION	6351	0	CELLULAR COMMUNICATION/SIGNAL TRANSDUCTION MECHANISM	5105	1
mc15000301	CELLULAR COMMUNICATION/SIGNAL TRANSDUCTION MECHANISM;INTERACTION WITH THE ENVIRONMENT;CELL FATE;DEVELOPMENT (Systemic);ORGAN DIFFERENTIATION	SUBCELLULAR LOCALIZATION	6316	0	DEVELOPMENT (Systemic)	5687	1
mc13000088	PROTEIN WITH BINDING FUNCTION OR COFACTOR REQUIREMENT (structural or catalytic);CELLULAR TRANSPORT TRANSPORT FACILITIES AND TRANSPORT ROUTES;SYSTEMIC INTERACTION WITH THE ENVIRONMENT;SUBCELLULAR LOCALIZATION;TISSUE LOCALIZATION	CELLULAR COMMUNICATION/SIGNAL TRANSDUCTION MECHANISM	6192	0	CELLULAR TRANSPORT TRANSPORT FACILITIES AND TRANSPORT ROUTES	6123	1
mc17001316	REGULATION OF METABOLISM AND PROTEIN FUNCTION;CELLULAR COMMUNICATION/SIGNAL TRANSDUCTION MECHANISM;SYSTEMIC INTERACTION WITH THE ENVIRONMENT;BIOGENESIS OF CELLULAR COMPONENTS;CELL TYPE DIFFERENTIATION	PROTEIN WITH BINDING FUNCTION OR COFACTOR REQUIREMENT (structural or catalytic)	6126	0	CELLULAR COMMUNICATION/SIGNAL TRANSDUCTION MECHANISM	5753	1
mc7001373	SUBCELLULAR LOCALIZATION	CELL CYCLE AND DNA PROCESSING	5994	0	SUBCELLULAR LOCALIZATION	5921	1
mcx000685	CELLULAR COMMUNICATION/SIGNAL TRANSDUCTION MECHANISM;DEVELOPMENT (Systemic)	SUBCELLULAR LOCALIZATION	5854	0	CELLULAR COMMUNICATION/SIGNAL TRANSDUCTION MECHANISM	5039	1
mc15000846	PROTEIN WITH BINDING FUNCTION OR COFACTOR REQUIREMENT (structural or catalytic);CELLULAR COMMUNICATION/SIGNAL TRANSDUCTION MECHANISM;DEVELOPMENT (Systemic);TISSUE DIFFERENTIATION	SUBCELLULAR LOCALIZATION	5565	0	PROTEIN WITH BINDING FUNCTION OR COFACTOR REQUIREMENT (structural or catalytic)	5074	1
mc13000860	CELLULAR COMMUNICATION/SIGNAL TRANSDUCTION MECHANISM;INTERACTION WITH THE ENVIRONMENT;SUBCELLULAR LOCALIZATION	PROTEIN WITH BINDING FUNCTION OR COFACTOR REQUIREMENT (structural or catalytic)	5491	0	INTERACTION WITH THE ENVIRONMENT	5468	1
mc11002081	PROTEIN WITH BINDING FUNCTION OR COFACTOR REQUIREMENT (structural or catalytic);SUBCELLULAR LOCALIZATION	BIOGENESIS OF CELLULAR COMPONENTS	5337	0	PROTEIN WITH BINDING FUNCTION OR COFACTOR REQUIREMENT (structural or catalytic)	5246	1
mc16000730	PROTEIN WITH BINDING FUNCTION OR COFACTOR REQUIREMENT (structural or catalytic);INTERACTION WITH THE ENVIRONMENT	SUBCELLULAR LOCALIZATION	5233	0	PROTEIN WITH BINDING FUNCTION OR COFACTOR REQUIREMENT (structural or catalytic)	4302	1
mc5000796	CELLULAR COMMUNICATION/SIGNAL TRANSDUCTION MECHANISM;INTERACTION WITH THE ENVIRONMENT;CELL FATE;SUBCELLULAR LOCALIZATION	CELLULAR TRANSPORT TRANSPORT FACILITIES AND TRANSPORT ROUTES	5198	0	CELLULAR COMMUNICATION/SIGNAL TRANSDUCTION MECHANISM	5198	1
mc9000672	METABOLISM;ENERGY;PROTEIN WITH BINDING FUNCTION OR COFACTOR REQUIREMENT (structural or catalytic);CELLULAR TRANSPORT TRANSPORT FACILITIES AND TRANSPORT ROUTES;CELLULAR COMMUNICATION/SIGNAL TRANSDUCTION MECHANISM;DEVELOPMENT (Systemic)	SUBCELLULAR LOCALIZATION	5143	0	PROTEIN WITH BINDING FUNCTION OR COFACTOR REQUIREMENT (structural or catalytic)	4127	1
mc9001093	CELLULAR COMMUNICATION/SIGNAL TRANSDUCTION MECHANISM;SUBCELLULAR LOCALIZATION	PROTEIN WITH BINDING FUNCTION OR COFACTOR REQUIREMENT (structural or catalytic)	5094	0	SUBCELLULAR LOCALIZATION	5094	1
mcx001724	SUBCELLULAR LOCALIZATION	PROTEIN WITH BINDING FUNCTION OR COFACTOR REQUIREMENT (structural or catalytic)	5021	0	SUBCELLULAR LOCALIZATION	4717	1
mc2001083	CELL TYPE DIFFERENTIATION;SUBCELLULAR LOCALIZATION;ORGAN LOCALIZATION	PROTEIN WITH BINDING FUNCTION OR COFACTOR REQUIREMENT (structural or catalytic)	4982	0	SUBCELLULAR LOCALIZATION	2663	1
mc12001220	PROTEIN WITH BINDING FUNCTION OR COFACTOR REQUIREMENT (structural or catalytic);CELLULAR TRANSPORT TRANSPORT FACILITIES AND TRANSPORT ROUTES;SUBCELLULAR LOCALIZATION	REGULATION OF METABOLISM AND PROTEIN FUNCTION	4948	0	SUBCELLULAR LOCALIZATION	2738	1
mc17000658	METABOLISM;ENERGY;PROTEIN FATE (folding modification destination);PROTEIN WITH BINDING FUNCTION OR COFACTOR REQUIREMENT (structural or catalytic);CELLULAR TRANSPORT TRANSPORT FACILITIES AND TRANSPORT ROUTES	SUBCELLULAR LOCALIZATION	4914	0	CELLULAR TRANSPORT TRANSPORT FACILITIES AND TRANSPORT ROUTES	4881	1
mc7000546	PROTEIN WITH BINDING FUNCTION OR COFACTOR REQUIREMENT (structural or catalytic);CELLULAR COMMUNICATION/SIGNAL TRANSDUCTION MECHANISM;CELL FATE;DEVELOPMENT (Systemic)	SUBCELLULAR LOCALIZATION	4882	0	PROTEIN WITH BINDING FUNCTION OR COFACTOR REQUIREMENT (structural or catalytic)	4517	1
mc3001353	CELL CYCLE AND DNA PROCESSING;TRANSCRIPTION;PROTEIN WITH BINDING FUNCTION OR COFACTOR REQUIREMENT (structural or catalytic);CELL RESCUE DEFENSE AND VIRULENCE	SUBCELLULAR LOCALIZATION	4870	0	CELL CYCLE AND DNA PROCESSING	4203	1
mcx001115	CELLULAR COMMUNICATION/SIGNAL TRANSDUCTION MECHANISM;SYSTEMIC INTERACTION WITH THE ENVIRONMENT	SUBCELLULAR LOCALIZATION	4867	0	CELLULAR COMMUNICATION/SIGNAL TRANSDUCTION MECHANISM	3088	1
mc9000386	PROTEIN WITH BINDING FUNCTION OR COFACTOR REQUIREMENT (structural or catalytic);INTERACTION WITH THE ENVIRONMENT	SUBCELLULAR LOCALIZATION	4845	0	PROTEIN WITH BINDING FUNCTION OR COFACTOR REQUIREMENT (structural or catalytic)	3936	1
mc11002129	BIOGENESIS OF CELLULAR COMPONENTS;SUBCELLULAR LOCALIZATION	PROTEIN WITH BINDING FUNCTION OR COFACTOR REQUIREMENT (structural or catalytic)	4814	0	SUBCELLULAR LOCALIZATION	4729	1
mc16000541	REGULATION OF METABOLISM AND PROTEIN FUNCTION;CELLULAR TRANSPORT TRANSPORT FACILITIES AND TRANSPORT ROUTES;SUBCELLULAR LOCALIZATION	PROTEIN WITH BINDING FUNCTION OR COFACTOR REQUIREMENT (structural or catalytic)	4793	0	SUBCELLULAR LOCALIZATION	3646	1
mc19000855	PROTEIN FATE (folding modification destination);SUBCELLULAR LOCALIZATION	PROTEIN WITH BINDING FUNCTION OR COFACTOR REQUIREMENT (structural or catalytic)	4775	0	SUBCELLULAR LOCALIZATION	3873	1
mc3001331	INTERACTION WITH THE ENVIRONMENT;SUBCELLULAR LOCALIZATION	PROTEIN WITH BINDING FUNCTION OR COFACTOR REQUIREMENT (structural or catalytic)	4720	0	INTERACTION WITH THE ENVIRONMENT	4553	1
mc2001370	CELLULAR COMMUNICATION/SIGNAL TRANSDUCTION MECHANISM	SUBCELLULAR LOCALIZATION	4712	0	CELLULAR COMMUNICATION/SIGNAL TRANSDUCTION MECHANISM	2060	1
mc11001061	CELLULAR COMMUNICATION/SIGNAL TRANSDUCTION MECHANISM;SUBCELLULAR LOCALIZATION	PROTEIN WITH BINDING FUNCTION OR COFACTOR REQUIREMENT (structural or catalytic)	4701	0	CELLULAR COMMUNICATION/SIGNAL TRANSDUCTION MECHANISM	4651	1
mc11002363	PROTEIN FATE (folding modification destination);CELLULAR COMMUNICATION/SIGNAL TRANSDUCTION MECHANISM;SUBCELLULAR LOCALIZATION	PROTEIN WITH BINDING FUNCTION OR COFACTOR REQUIREMENT (structural or catalytic)	4615	0	PROTEIN FATE (folding modification destination)	4486	1
mc9000680	CELLULAR TRANSPORT TRANSPORT FACILITIES AND TRANSPORT ROUTES;CELLULAR COMMUNICATION/SIGNAL TRANSDUCTION MECHANISM;INTERACTION WITH THE ENVIRONMENT	SUBCELLULAR LOCALIZATION	4608	0	CELLULAR TRANSPORT TRANSPORT FACILITIES AND TRANSPORT ROUTES	4190	1
mc2000417	PROTEIN FATE (folding modification destination);PROTEIN WITH BINDING FUNCTION OR COFACTOR REQUIREMENT (structural or catalytic)	SUBCELLULAR LOCALIZATION	4601	0	PROTEIN WITH BINDING FUNCTION OR COFACTOR REQUIREMENT (structural or catalytic)	4319	1
mc8000645	PROTEIN WITH BINDING FUNCTION OR COFACTOR REQUIREMENT (structural or catalytic);REGULATION OF METABOLISM AND PROTEIN FUNCTION;CELLULAR COMMUNICATION/SIGNAL TRANSDUCTION MECHANISM;CELL RESCUE DEFENSE AND VIRULENCE;INTERACTION WITH THE ENVIRONMENT;SYSTEMIC INTERACTION WITH THE ENVIRONMENT;CELL FATE;CELL TYPE DIFFERENTIATION	SUBCELLULAR LOCALIZATION	4538	0	CELLULAR COMMUNICATION/SIGNAL TRANSDUCTION MECHANISM	2360	1
mc7000272	PROTEIN WITH BINDING FUNCTION OR COFACTOR REQUIREMENT (structural or catalytic)	SUBCELLULAR LOCALIZATION	4520	0	PROTEIN WITH BINDING FUNCTION OR COFACTOR REQUIREMENT (structural or catalytic)	3195	1
mc2002307	SUBCELLULAR LOCALIZATION	PROTEIN WITH BINDING FUNCTION OR COFACTOR REQUIREMENT (structural or catalytic)	4486	0	SUBCELLULAR LOCALIZATION	4374	1
mc15000885	TRANSCRIPTION;CELLULAR COMMUNICATION/SIGNAL TRANSDUCTION MECHANISM;TISSUE LOCALIZATION	PROTEIN WITH BINDING FUNCTION OR COFACTOR REQUIREMENT (structural or catalytic)	4434	0	TRANSCRIPTION	2705	1
mc9000048	METABOLISM;PROTEIN FATE (folding modification destination);INTERACTION WITH THE ENVIRONMENT;CELL FATE;DEVELOPMENT (Systemic);BIOGENESIS OF CELLULAR COMPONENTS;SUBCELLULAR LOCALIZATION	PROTEIN WITH BINDING FUNCTION OR COFACTOR REQUIREMENT (structural or catalytic)	4416	0	PROTEIN FATE (folding modification destination)	4412	1
mc11001462	CELLULAR COMMUNICATION/SIGNAL TRANSDUCTION MECHANISM	SUBCELLULAR LOCALIZATION	4058	0	CELLULAR COMMUNICATION/SIGNAL TRANSDUCTION MECHANISM	1909	1
mc7002777	CELLULAR TRANSPORT TRANSPORT FACILITIES AND TRANSPORT ROUTES;SYSTEMIC INTERACTION WITH THE ENVIRONMENT;SUBCELLULAR LOCALIZATION;CELL TYPE LOCALIZATION	CELLULAR COMMUNICATION/SIGNAL TRANSDUCTION MECHANISM	4054	0	SUBCELLULAR LOCALIZATION	2713	1
mc6002362	INTERACTION WITH THE ENVIRONMENT;SYSTEMIC INTERACTION WITH THE ENVIRONMENT	CELLULAR COMMUNICATION/SIGNAL TRANSDUCTION MECHANISM	3992	0	INTERACTION WITH THE ENVIRONMENT	2631	1
mc9001697	CELLULAR COMMUNICATION/SIGNAL TRANSDUCTION MECHANISM;DEVELOPMENT (Systemic);SUBCELLULAR LOCALIZATION	PROTEIN WITH BINDING FUNCTION OR COFACTOR REQUIREMENT (structural or catalytic)	3977	0	CELLULAR COMMUNICATION/SIGNAL TRANSDUCTION MECHANISM	3503	1
mc14001482	DEVELOPMENT (Systemic)	SUBCELLULAR LOCALIZATION	3886	0	DEVELOPMENT (Systemic)	2240	1
mcx000586	PROTEIN FATE (folding modification destination);CELLULAR TRANSPORT TRANSPORT FACILITIES AND TRANSPORT ROUTES;DEVELOPMENT (Systemic)	SUBCELLULAR LOCALIZATION	3885	0	DEVELOPMENT (Systemic)	2173	1
mc14001477	DEVELOPMENT (Systemic)	SUBCELLULAR LOCALIZATION	3873	0	DEVELOPMENT (Systemic)	2083	1
mc3000841	DEVELOPMENT (Systemic)	SUBCELLULAR LOCALIZATION	3855	0	DEVELOPMENT (Systemic)	2104	1
mc6002363	INTERACTION WITH THE ENVIRONMENT;SYSTEMIC INTERACTION WITH THE ENVIRONMENT	CELLULAR COMMUNICATION/SIGNAL TRANSDUCTION MECHANISM	3844	0	INTERACTION WITH THE ENVIRONMENT	2274	1
mc7002775	CELLULAR COMMUNICATION/SIGNAL TRANSDUCTION MECHANISM	SUBCELLULAR LOCALIZATION	3814	0	CELLULAR COMMUNICATION/SIGNAL TRANSDUCTION MECHANISM	2739	1
mc14001074	PROTEIN FATE (folding modification destination);PROTEIN WITH BINDING FUNCTION OR COFACTOR REQUIREMENT (structural or catalytic);CELLULAR COMMUNICATION/SIGNAL TRANSDUCTION MECHANISM	SUBCELLULAR LOCALIZATION	3763	0	CELLULAR COMMUNICATION/SIGNAL TRANSDUCTION MECHANISM	3154	1
mc17000588	PROTEIN FATE (folding modification destination);CELLULAR TRANSPORT TRANSPORT FACILITIES AND TRANSPORT ROUTES	PROTEIN WITH BINDING FUNCTION OR COFACTOR REQUIREMENT (structural or catalytic)	3718	0	CELLULAR TRANSPORT TRANSPORT FACILITIES AND TRANSPORT ROUTES	2641	1
mc14000447	METABOLISM;PROTEIN WITH BINDING FUNCTION OR COFACTOR REQUIREMENT (structural or catalytic);CELLULAR TRANSPORT TRANSPORT FACILITIES AND TRANSPORT ROUTES;CELLULAR COMMUNICATION/SIGNAL TRANSDUCTION MECHANISM;INTERACTION WITH THE ENVIRONMENT	SUBCELLULAR LOCALIZATION	3673	0	CELLULAR TRANSPORT TRANSPORT FACILITIES AND TRANSPORT ROUTES	3601	1
mcx001039	CELL CYCLE AND DNA PROCESSING;TRANSCRIPTION;PROTEIN WITH BINDING FUNCTION OR COFACTOR REQUIREMENT (structural or catalytic)	SUBCELLULAR LOCALIZATION	3670	0	CELL CYCLE AND DNA PROCESSING	3204	1
mc17001599	CELLULAR COMMUNICATION/SIGNAL TRANSDUCTION MECHANISM;SUBCELLULAR LOCALIZATION	PROTEIN WITH BINDING FUNCTION OR COFACTOR REQUIREMENT (structural or catalytic)	3650	0	SUBCELLULAR LOCALIZATION	3341	1
mc16001023	PROTEIN WITH BINDING FUNCTION OR COFACTOR REQUIREMENT (structural or catalytic);INTERACTION WITH THE ENVIRONMENT	SUBCELLULAR LOCALIZATION	3582	0	PROTEIN WITH BINDING FUNCTION OR COFACTOR REQUIREMENT (structural or catalytic)	2795	1
mc12001361	CELL FATE;SUBCELLULAR LOCALIZATION	PROTEIN WITH BINDING FUNCTION OR COFACTOR REQUIREMENT (structural or catalytic)	3537	0	SUBCELLULAR LOCALIZATION	3525	1
mc3000284	PROTEIN FATE (folding modification destination);PROTEIN WITH BINDING FUNCTION OR COFACTOR REQUIREMENT (structural or catalytic);CELLULAR COMMUNICATION/SIGNAL TRANSDUCTION MECHANISM	SUBCELLULAR LOCALIZATION	3497	0	CELLULAR COMMUNICATION/SIGNAL TRANSDUCTION MECHANISM	3131	1
mcx000520	REGULATION OF METABOLISM AND PROTEIN FUNCTION	PROTEIN WITH BINDING FUNCTION OR COFACTOR REQUIREMENT (structural or catalytic)	3486	0	REGULATION OF METABOLISM AND PROTEIN FUNCTION	2945	1
mc8001851	BIOGENESIS OF CELLULAR COMPONENTS;SUBCELLULAR LOCALIZATION	PROTEIN WITH BINDING FUNCTION OR COFACTOR REQUIREMENT (structural or catalytic)	3473	0	SUBCELLULAR LOCALIZATION	1629	1
mc13000314	SUBCELLULAR LOCALIZATION	PROTEIN WITH BINDING FUNCTION OR COFACTOR REQUIREMENT (structural or catalytic)	3377	0	SUBCELLULAR LOCALIZATION	2804	1
mc7001627	PROTEIN WITH BINDING FUNCTION OR COFACTOR REQUIREMENT (structural or catalytic);REGULATION OF METABOLISM AND PROTEIN FUNCTION;CELLULAR TRANSPORT TRANSPORT FACILITIES AND TRANSPORT ROUTES	SUBCELLULAR LOCALIZATION	3360	0	CELLULAR TRANSPORT TRANSPORT FACILITIES AND TRANSPORT ROUTES	3083	1
mc2000167	PROTEIN FATE (folding modification destination);CELLULAR COMMUNICATION/SIGNAL TRANSDUCTION MECHANISM;SUBCELLULAR LOCALIZATION	PROTEIN WITH BINDING FUNCTION OR COFACTOR REQUIREMENT (structural or catalytic)	3335	0	SUBCELLULAR LOCALIZATION	2646	1
mc1002587	INTERACTION WITH THE ENVIRONMENT;SYSTEMIC INTERACTION WITH THE ENVIRONMENT;CELL FATE;SUBCELLULAR LOCALIZATION	PROTEIN WITH BINDING FUNCTION OR COFACTOR REQUIREMENT (structural or catalytic)	3331	0	SUBCELLULAR LOCALIZATION	3320	1
mc1000362	PROTEIN WITH BINDING FUNCTION OR COFACTOR REQUIREMENT (structural or catalytic);CELLULAR TRANSPORT TRANSPORT FACILITIES AND TRANSPORT ROUTES;SUBCELLULAR LOCALIZATION	BIOGENESIS OF CELLULAR COMPONENTS	3288	0	SUBCELLULAR LOCALIZATION	3194	1
mc4000035	PROTEIN WITH BINDING FUNCTION OR COFACTOR REQUIREMENT (structural or catalytic);CELL FATE	SUBCELLULAR LOCALIZATION	3286	0	PROTEIN WITH BINDING FUNCTION OR COFACTOR REQUIREMENT (structural or catalytic)	2316	1
mc4000471	BIOGENESIS OF CELLULAR COMPONENTS;CELL TYPE DIFFERENTIATION;SUBCELLULAR LOCALIZATION;CELL TYPE LOCALIZATION	PROTEIN WITH BINDING FUNCTION OR COFACTOR REQUIREMENT (structural or catalytic)	3227	0	SUBCELLULAR LOCALIZATION	2087	1
mc9001132	CELL CYCLE AND DNA PROCESSING;PROTEIN WITH BINDING FUNCTION OR COFACTOR REQUIREMENT (structural or catalytic)	SUBCELLULAR LOCALIZATION	3212	0	PROTEIN WITH BINDING FUNCTION OR COFACTOR REQUIREMENT (structural or catalytic)	3025	1
mc6002140	METABOLISM;TRANSCRIPTION;PROTEIN WITH BINDING FUNCTION OR COFACTOR REQUIREMENT (structural or catalytic);CELLULAR COMMUNICATION/SIGNAL TRANSDUCTION MECHANISM	SUBCELLULAR LOCALIZATION	3196	0	PROTEIN WITH BINDING FUNCTION OR COFACTOR REQUIREMENT (structural or catalytic)	2585	1
mc12001424	CELL RESCUE DEFENSE AND VIRULENCE;CELL FATE;SUBCELLULAR LOCALIZATION	PROTEIN WITH BINDING FUNCTION OR COFACTOR REQUIREMENT (structural or catalytic)	3181	0	SUBCELLULAR LOCALIZATION	2167	1
mc7001147	DEVELOPMENT (Systemic);SUBCELLULAR LOCALIZATION	PROTEIN WITH BINDING FUNCTION OR COFACTOR REQUIREMENT (structural or catalytic)	3121	0	SUBCELLULAR LOCALIZATION	2256	1
mc10001894	SUBCELLULAR LOCALIZATION	METABOLISM	3097	0	SUBCELLULAR LOCALIZATION	2231	1
mc6001200	METABOLISM;PROTEIN WITH BINDING FUNCTION OR COFACTOR REQUIREMENT (structural or catalytic);CELLULAR COMMUNICATION/SIGNAL TRANSDUCTION MECHANISM;DEVELOPMENT (Systemic);SUBCELLULAR LOCALIZATION	CELLULAR TRANSPORT TRANSPORT FACILITIES AND TRANSPORT ROUTES	3085	0	SUBCELLULAR LOCALIZATION	3043	1
mc4001669	METABOLISM;CELLULAR COMMUNICATION/SIGNAL TRANSDUCTION MECHANISM	PROTEIN WITH BINDING FUNCTION OR COFACTOR REQUIREMENT (structural or catalytic)	3068	0	CELLULAR COMMUNICATION/SIGNAL TRANSDUCTION MECHANISM	3068	1
mc4000813	PROTEIN WITH BINDING FUNCTION OR COFACTOR REQUIREMENT (structural or catalytic);REGULATION OF METABOLISM AND PROTEIN FUNCTION;CELLULAR COMMUNICATION/SIGNAL TRANSDUCTION MECHANISM;CELL RESCUE DEFENSE AND VIRULENCE;SYSTEMIC INTERACTION WITH THE ENVIRONMENT	SUBCELLULAR LOCALIZATION	3057	0	CELLULAR COMMUNICATION/SIGNAL TRANSDUCTION MECHANISM	2128	1
mc6001836	CELLULAR COMMUNICATION/SIGNAL TRANSDUCTION MECHANISM	PROTEIN WITH BINDING FUNCTION OR COFACTOR REQUIREMENT (structural or catalytic)	3051	0	CELLULAR COMMUNICATION/SIGNAL TRANSDUCTION MECHANISM	1768	1
mc16000359	METABOLISM;PROTEIN WITH BINDING FUNCTION OR COFACTOR REQUIREMENT (structural or catalytic);SUBCELLULAR LOCALIZATION	CELLULAR TRANSPORT TRANSPORT FACILITIES AND TRANSPORT ROUTES	3031	0	SUBCELLULAR LOCALIZATION	2933	1
mc11001593	PROTEIN WITH BINDING FUNCTION OR COFACTOR REQUIREMENT (structural or catalytic);CELLULAR COMMUNICATION/SIGNAL TRANSDUCTION MECHANISM;INTERACTION WITH THE ENVIRONMENT	SUBCELLULAR LOCALIZATION	3006	0	INTERACTION WITH THE ENVIRONMENT	1111	1
mc14000622	ENERGY;CELLULAR TRANSPORT TRANSPORT FACILITIES AND TRANSPORT ROUTES;CELLULAR COMMUNICATION/SIGNAL TRANSDUCTION MECHANISM;INTERACTION WITH THE ENVIRONMENT;SYSTEMIC INTERACTION WITH THE ENVIRONMENT	SUBCELLULAR LOCALIZATION	2997	0	CELLULAR COMMUNICATION/SIGNAL TRANSDUCTION MECHANISM	2160	1
mc4001077	METABOLISM;PROTEIN WITH BINDING FUNCTION OR COFACTOR REQUIREMENT (structural or catalytic);REGULATION OF METABOLISM AND PROTEIN FUNCTION;CELLULAR COMMUNICATION/SIGNAL TRANSDUCTION MECHANISM;SYSTEMIC INTERACTION WITH THE ENVIRONMENT	SUBCELLULAR LOCALIZATION	2991	0	PROTEIN WITH BINDING FUNCTION OR COFACTOR REQUIREMENT (structural or catalytic)	2457	1
mcx000819	TRANSCRIPTION;SUBCELLULAR LOCALIZATION	PROTEIN WITH BINDING FUNCTION OR COFACTOR REQUIREMENT (structural or catalytic)	2983	0	SUBCELLULAR LOCALIZATION	2402	1
mc10001103	ENERGY;PROTEIN WITH BINDING FUNCTION OR COFACTOR REQUIREMENT (structural or catalytic);CELLULAR TRANSPORT TRANSPORT FACILITIES AND TRANSPORT ROUTES;CELLULAR COMMUNICATION/SIGNAL TRANSDUCTION MECHANISM	REGULATION OF METABOLISM AND PROTEIN FUNCTION	2967	0	CELLULAR COMMUNICATION/SIGNAL TRANSDUCTION MECHANISM	2428	1
mc11001771	METABOLISM;PROTEIN FATE (folding modification destination);PROTEIN WITH BINDING FUNCTION OR COFACTOR REQUIREMENT (structural or catalytic)	CELLULAR COMMUNICATION/SIGNAL TRANSDUCTION MECHANISM	2938	0	PROTEIN FATE (folding modification destination)	2931	1
mc1002119	PROTEIN WITH BINDING FUNCTION OR COFACTOR REQUIREMENT (structural or catalytic);INTERACTION WITH THE ENVIRONMENT;SYSTEMIC INTERACTION WITH THE ENVIRONMENT	SUBCELLULAR LOCALIZATION	2924	0	PROTEIN WITH BINDING FUNCTION OR COFACTOR REQUIREMENT (structural or catalytic)	2183	1
mc17000926	CELL RESCUE DEFENSE AND VIRULENCE	SYSTEMIC INTERACTION WITH THE ENVIRONMENT	2909	0	CELL RESCUE DEFENSE AND VIRULENCE	2202	1
mc14001430	TRANSCRIPTION;SUBCELLULAR LOCALIZATION;CELL TYPE LOCALIZATION;ORGAN LOCALIZATION	PROTEIN WITH BINDING FUNCTION OR COFACTOR REQUIREMENT (structural or catalytic)	2899	0	SUBCELLULAR LOCALIZATION	2899	1
mc11001475	CELLULAR TRANSPORT TRANSPORT FACILITIES AND TRANSPORT ROUTES;CELLULAR COMMUNICATION/SIGNAL TRANSDUCTION MECHANISM;SUBCELLULAR LOCALIZATION	PROTEIN WITH BINDING FUNCTION OR COFACTOR REQUIREMENT (structural or catalytic)	2884	0	SUBCELLULAR LOCALIZATION	2467	1
mc4001538	SUBCELLULAR LOCALIZATION	PROTEIN WITH BINDING FUNCTION OR COFACTOR REQUIREMENT (structural or catalytic)	2870	0	SUBCELLULAR LOCALIZATION	2147	1
mc19000179	PROTEIN WITH BINDING FUNCTION OR COFACTOR REQUIREMENT (structural or catalytic);CELLULAR COMMUNICATION/SIGNAL TRANSDUCTION MECHANISM;INTERACTION WITH THE ENVIRONMENT	SUBCELLULAR LOCALIZATION	2811	0	PROTEIN WITH BINDING FUNCTION OR COFACTOR REQUIREMENT (structural or catalytic)	2650	1
mc10000698	PROTEIN WITH BINDING FUNCTION OR COFACTOR REQUIREMENT (structural or catalytic)	SUBCELLULAR LOCALIZATION	2790	0	PROTEIN WITH BINDING FUNCTION OR COFACTOR REQUIREMENT (structural or catalytic)	2329	1
mc14000347	METABOLISM;PROTEIN WITH BINDING FUNCTION OR COFACTOR REQUIREMENT (structural or catalytic);REGULATION OF METABOLISM AND PROTEIN FUNCTION	SUBCELLULAR LOCALIZATION	2763	0	METABOLISM	1612	1
mc10001955	CELLULAR COMMUNICATION/SIGNAL TRANSDUCTION MECHANISM;DEVELOPMENT (Systemic);TISSUE DIFFERENTIATION;SUBCELLULAR LOCALIZATION;TISSUE LOCALIZATION	CELL FATE	2761	0	SUBCELLULAR LOCALIZATION	2638	1
mc19001092	PROTEIN FATE (folding modification destination);CELL RESCUE DEFENSE AND VIRULENCE;SUBCELLULAR LOCALIZATION	METABOLISM	2737	0	PROTEIN FATE (folding modification destination)	2414	1
mc11002062	SUBCELLULAR LOCALIZATION	CELLULAR TRANSPORT TRANSPORT FACILITIES AND TRANSPORT ROUTES	2681	0	SUBCELLULAR LOCALIZATION	2681	1
mc13000589	BIOGENESIS OF CELLULAR COMPONENTS;SUBCELLULAR LOCALIZATION	PROTEIN WITH BINDING FUNCTION OR COFACTOR REQUIREMENT (structural or catalytic)	2673	0	SUBCELLULAR LOCALIZATION	2624	1
mc16000277	PROTEIN WITH BINDING FUNCTION OR COFACTOR REQUIREMENT (structural or catalytic);CELLULAR COMMUNICATION/SIGNAL TRANSDUCTION MECHANISM;INTERACTION WITH THE ENVIRONMENT	SUBCELLULAR LOCALIZATION	2667	0	PROTEIN WITH BINDING FUNCTION OR COFACTOR REQUIREMENT (structural or catalytic)	2251	1
mc8000996	PROTEIN WITH BINDING FUNCTION OR COFACTOR REQUIREMENT (structural or catalytic);CELLULAR TRANSPORT TRANSPORT FACILITIES AND TRANSPORT ROUTES;SUBCELLULAR LOCALIZATION	METABOLISM	2647	0	SUBCELLULAR LOCALIZATION	2340	1
mc16001246	PROTEIN FATE (folding modification destination);PROTEIN WITH BINDING FUNCTION OR COFACTOR REQUIREMENT (structural or catalytic);CELLULAR TRANSPORT TRANSPORT FACILITIES AND TRANSPORT ROUTES;CELLULAR COMMUNICATION/SIGNAL TRANSDUCTION MECHANISM;INTERACTION WITH THE ENVIRONMENT;CELL TYPE LOCALIZATION;ORGAN LOCALIZATION	METABOLISM	2619	0	CELLULAR COMMUNICATION/SIGNAL TRANSDUCTION MECHANISM	2263	1
mc9000009	CELLULAR COMMUNICATION/SIGNAL TRANSDUCTION MECHANISM;SUBCELLULAR LOCALIZATION	METABOLISM	2615	0	CELLULAR COMMUNICATION/SIGNAL TRANSDUCTION MECHANISM	2318	1
mc9002117	BIOGENESIS OF CELLULAR COMPONENTS	PROTEIN WITH BINDING FUNCTION OR COFACTOR REQUIREMENT (structural or catalytic)	2592	0	BIOGENESIS OF CELLULAR COMPONENTS	2592	1
mc5000487	PROTEIN FATE (folding modification destination);SUBCELLULAR LOCALIZATION	PROTEIN WITH BINDING FUNCTION OR COFACTOR REQUIREMENT (structural or catalytic)	2584	0	PROTEIN FATE (folding modification destination)	2399	1
mc1002716	PROTEIN WITH BINDING FUNCTION OR COFACTOR REQUIREMENT (structural or catalytic);SUBCELLULAR LOCALIZATION	TRANSCRIPTION	2576	0	PROTEIN WITH BINDING FUNCTION OR COFACTOR REQUIREMENT (structural or catalytic)	2576	1
mc11001866	PROTEIN WITH BINDING FUNCTION OR COFACTOR REQUIREMENT (structural or catalytic);CELLULAR COMMUNICATION/SIGNAL TRANSDUCTION MECHANISM	SUBCELLULAR LOCALIZATION	2575	0	PROTEIN WITH BINDING FUNCTION OR COFACTOR REQUIREMENT (structural or catalytic)	1138	1
mc11001674	CELLULAR COMMUNICATION/SIGNAL TRANSDUCTION MECHANISM	PROTEIN WITH BINDING FUNCTION OR COFACTOR REQUIREMENT (structural or catalytic)	2563	0	CELLULAR COMMUNICATION/SIGNAL TRANSDUCTION MECHANISM	2376	1
mc15001478	ENERGY;PROTEIN WITH BINDING FUNCTION OR COFACTOR REQUIREMENT (structural or catalytic);CELLULAR TRANSPORT TRANSPORT FACILITIES AND TRANSPORT ROUTES;CELLULAR COMMUNICATION/SIGNAL TRANSDUCTION MECHANISM	REGULATION OF METABOLISM AND PROTEIN FUNCTION	2543	0	PROTEIN WITH BINDING FUNCTION OR COFACTOR REQUIREMENT (structural or catalytic)	1587	1
mc12001618	INTERACTION WITH THE ENVIRONMENT;SUBCELLULAR LOCALIZATION	CELLULAR COMMUNICATION/SIGNAL TRANSDUCTION MECHANISM	2535	0	INTERACTION WITH THE ENVIRONMENT	2535	1
mc14000947	METABOLISM	CELLULAR COMMUNICATION/SIGNAL TRANSDUCTION MECHANISM	2468	0	METABOLISM	2180	1
mc17001213	PROTEIN FATE (folding modification destination);SUBCELLULAR LOCALIZATION	METABOLISM	2457	0	PROTEIN FATE (folding modification destination)	2457	1
mc5002034	CELL RESCUE DEFENSE AND VIRULENCE;SYSTEMIC INTERACTION WITH THE ENVIRONMENT;SUBCELLULAR LOCALIZATION	CELLULAR COMMUNICATION/SIGNAL TRANSDUCTION MECHANISM	2446	0	SUBCELLULAR LOCALIZATION	2377	1
mc3001306	INTERACTION WITH THE ENVIRONMENT;SUBCELLULAR LOCALIZATION	CELLULAR TRANSPORT TRANSPORT FACILITIES AND TRANSPORT ROUTES	2429	0	SUBCELLULAR LOCALIZATION	2266	1
mc1002264	PROTEIN WITH BINDING FUNCTION OR COFACTOR REQUIREMENT (structural or catalytic);INTERACTION WITH THE ENVIRONMENT;BIOGENESIS OF CELLULAR COMPONENTS;TISSUE DIFFERENTIATION	SUBCELLULAR LOCALIZATION	2426	0	PROTEIN WITH BINDING FUNCTION OR COFACTOR REQUIREMENT (structural or catalytic)	1670	1
mc9001884	BIOGENESIS OF CELLULAR COMPONENTS;SUBCELLULAR LOCALIZATION	PROTEIN WITH BINDING FUNCTION OR COFACTOR REQUIREMENT (structural or catalytic)	2421	0	SUBCELLULAR LOCALIZATION	2331	1
mc6001837	CELLULAR COMMUNICATION/SIGNAL TRANSDUCTION MECHANISM	PROTEIN WITH BINDING FUNCTION OR COFACTOR REQUIREMENT (structural or catalytic)	2416	0	CELLULAR COMMUNICATION/SIGNAL TRANSDUCTION MECHANISM	1397	1
mc4002569	CELLULAR COMMUNICATION/SIGNAL TRANSDUCTION MECHANISM;SYSTEMIC INTERACTION WITH THE ENVIRONMENT	SUBCELLULAR LOCALIZATION	2386	0	CELLULAR COMMUNICATION/SIGNAL TRANSDUCTION MECHANISM	1933	1
mc5001295	METABOLISM;SUBCELLULAR LOCALIZATION	PROTEIN WITH BINDING FUNCTION OR COFACTOR REQUIREMENT (structural or catalytic)	2382	0	SUBCELLULAR LOCALIZATION	2294	1
mc9001823	PROTEIN WITH BINDING FUNCTION OR COFACTOR REQUIREMENT (structural or catalytic)	SUBCELLULAR LOCALIZATION	2380	0	PROTEIN WITH BINDING FUNCTION OR COFACTOR REQUIREMENT (structural or catalytic)	1917	1
mc13000869	ENERGY;SUBCELLULAR LOCALIZATION	METABOLISM	2366	0	ENERGY	2366	1
mc1001163	CELLULAR COMMUNICATION/SIGNAL TRANSDUCTION MECHANISM;CELL FATE;CELL TYPE LOCALIZATION	REGULATION OF METABOLISM AND PROTEIN FUNCTION	2177	0	CELLULAR COMMUNICATION/SIGNAL TRANSDUCTION MECHANISM	1348	1
mc3000843	METABOLISM	SUBCELLULAR LOCALIZATION	2170	0	METABOLISM	1011	1
mc7002776	CELLULAR COMMUNICATION/SIGNAL TRANSDUCTION MECHANISM	SUBCELLULAR LOCALIZATION	2156	0	CELLULAR COMMUNICATION/SIGNAL TRANSDUCTION MECHANISM	1870	1
mc10000601	TRANSCRIPTION;PROTEIN WITH BINDING FUNCTION OR COFACTOR REQUIREMENT (structural or catalytic);SUBCELLULAR LOCALIZATION	CELL CYCLE AND DNA PROCESSING	2142	0	PROTEIN WITH BINDING FUNCTION OR COFACTOR REQUIREMENT (structural or catalytic)	2017	1
mc14000954	PROTEIN WITH BINDING FUNCTION OR COFACTOR REQUIREMENT (structural or catalytic)	SUBCELLULAR LOCALIZATION	2134	0	PROTEIN WITH BINDING FUNCTION OR COFACTOR REQUIREMENT (structural or catalytic)	2117	1
mc9000055	CELLULAR COMMUNICATION/SIGNAL TRANSDUCTION MECHANISM;CELL FATE;SUBCELLULAR LOCALIZATION	PROTEIN WITH BINDING FUNCTION OR COFACTOR REQUIREMENT (structural or catalytic)	2103	0	CELL FATE	1659	1
mc11002063	CELL CYCLE AND DNA PROCESSING;PROTEIN WITH BINDING FUNCTION OR COFACTOR REQUIREMENT (structural or catalytic);SUBCELLULAR LOCALIZATION	METABOLISM	2080	0	CELL CYCLE AND DNA PROCESSING	2080	1
mc9000224	CELLULAR COMMUNICATION/SIGNAL TRANSDUCTION MECHANISM	SUBCELLULAR LOCALIZATION	2070	0	CELLULAR COMMUNICATION/SIGNAL TRANSDUCTION MECHANISM	1182	1
mc17000750	PROTEIN WITH BINDING FUNCTION OR COFACTOR REQUIREMENT (structural or catalytic)	SUBCELLULAR LOCALIZATION	2063	0	PROTEIN WITH BINDING FUNCTION OR COFACTOR REQUIREMENT (structural or catalytic)	2035	1
mc9001054	PROTEIN WITH BINDING FUNCTION OR COFACTOR REQUIREMENT (structural or catalytic);INTERACTION WITH THE ENVIRONMENT	SUBCELLULAR LOCALIZATION	2045	0	PROTEIN WITH BINDING FUNCTION OR COFACTOR REQUIREMENT (structural or catalytic)	884	1
mc3001134	PROTEIN WITH BINDING FUNCTION OR COFACTOR REQUIREMENT (structural or catalytic);CELLULAR TRANSPORT TRANSPORT FACILITIES AND TRANSPORT ROUTES;SUBCELLULAR LOCALIZATION	METABOLISM	2025	0	SUBCELLULAR LOCALIZATION	1551	1
mc2002193	METABOLISM;SUBCELLULAR LOCALIZATION	PROTEIN WITH BINDING FUNCTION OR COFACTOR REQUIREMENT (structural or catalytic)	2002	0	SUBCELLULAR LOCALIZATION	1238	1
mc7000513	PROTEIN WITH BINDING FUNCTION OR COFACTOR REQUIREMENT (structural or catalytic)	CELLULAR TRANSPORT TRANSPORT FACILITIES AND TRANSPORT ROUTES	1981	0	PROTEIN WITH BINDING FUNCTION OR COFACTOR REQUIREMENT (structural or catalytic)	1559	1
mc1001383	SUBCELLULAR LOCALIZATION	METABOLISM	1947	0	SUBCELLULAR LOCALIZATION	1422	1
mc4002501	PROTEIN WITH BINDING FUNCTION OR COFACTOR REQUIREMENT (structural or catalytic);BIOGENESIS OF CELLULAR COMPONENTS	SUBCELLULAR LOCALIZATION	1919	0	PROTEIN WITH BINDING FUNCTION OR COFACTOR REQUIREMENT (structural or catalytic)	1478	1
mc7000853	PROTEIN WITH BINDING FUNCTION OR COFACTOR REQUIREMENT (structural or catalytic);INTERACTION WITH THE ENVIRONMENT	SUBCELLULAR LOCALIZATION	1915	0	PROTEIN WITH BINDING FUNCTION OR COFACTOR REQUIREMENT (structural or catalytic)	1887	1
mc3001628	PROTEIN WITH BINDING FUNCTION OR COFACTOR REQUIREMENT (structural or catalytic);SUBCELLULAR LOCALIZATION	CELLULAR COMMUNICATION/SIGNAL TRANSDUCTION MECHANISM	1884	0	SUBCELLULAR LOCALIZATION	1536	1
mc18000387	PROTEIN WITH BINDING FUNCTION OR COFACTOR REQUIREMENT (structural or catalytic);CELLULAR TRANSPORT TRANSPORT FACILITIES AND TRANSPORT ROUTES	SUBCELLULAR LOCALIZATION	1868	0	CELLULAR TRANSPORT TRANSPORT FACILITIES AND TRANSPORT ROUTES	1794	1
mc11002593	PROTEIN FATE (folding modification destination)	METABOLISM	1862	0	PROTEIN FATE (folding modification destination)	1859	1
mc6002024	CELLULAR COMMUNICATION/SIGNAL TRANSDUCTION MECHANISM;SUBCELLULAR LOCALIZATION	PROTEIN WITH BINDING FUNCTION OR COFACTOR REQUIREMENT (structural or catalytic)	1846	0	CELLULAR COMMUNICATION/SIGNAL TRANSDUCTION MECHANISM	1832	1
mc6002013	CELLULAR COMMUNICATION/SIGNAL TRANSDUCTION MECHANISM	PROTEIN WITH BINDING FUNCTION OR COFACTOR REQUIREMENT (structural or catalytic)	1843	0	CELLULAR COMMUNICATION/SIGNAL TRANSDUCTION MECHANISM	1830	1
mc1001748	PROTEIN WITH BINDING FUNCTION OR COFACTOR REQUIREMENT (structural or catalytic);INTERACTION WITH THE ENVIRONMENT;SYSTEMIC INTERACTION WITH THE ENVIRONMENT;TISSUE DIFFERENTIATION;TISSUE LOCALIZATION	SUBCELLULAR LOCALIZATION	1837	0	PROTEIN WITH BINDING FUNCTION OR COFACTOR REQUIREMENT (structural or catalytic)	1470	1
mc19000089	PROTEIN FATE (folding modification destination);PROTEIN WITH BINDING FUNCTION OR COFACTOR REQUIREMENT (structural or catalytic);BIOGENESIS OF CELLULAR COMPONENTS;SUBCELLULAR LOCALIZATION	METABOLISM	1825	0	PROTEIN FATE (folding modification destination)	1777	1
mc18001209	METABOLISM	PROTEIN FATE (folding modification destination)	1801	0	METABOLISM	1684	1
mc3000999	CELLULAR COMMUNICATION/SIGNAL TRANSDUCTION MECHANISM	SUBCELLULAR LOCALIZATION	1794	0	CELLULAR COMMUNICATION/SIGNAL TRANSDUCTION MECHANISM	1289	1
mc16000045	PROTEIN WITH BINDING FUNCTION OR COFACTOR REQUIREMENT (structural or catalytic)	CELL CYCLE AND DNA PROCESSING	1740	0	PROTEIN WITH BINDING FUNCTION OR COFACTOR REQUIREMENT (structural or catalytic)	1740	1
mc5002065	INTERACTION WITH THE ENVIRONMENT;SUBCELLULAR LOCALIZATION	METABOLISM	1713	0	SUBCELLULAR LOCALIZATION	1611	1
mc17001336	METABOLISM;SUBCELLULAR LOCALIZATION	PROTEIN WITH BINDING FUNCTION OR COFACTOR REQUIREMENT (structural or catalytic)	1697	0	SUBCELLULAR LOCALIZATION	1111	1
mc1000713	CELLULAR TRANSPORT TRANSPORT FACILITIES AND TRANSPORT ROUTES	SUBCELLULAR LOCALIZATION	1689	0	CELLULAR TRANSPORT TRANSPORT FACILITIES AND TRANSPORT ROUTES	1687	1
mc2000589	PROTEIN FATE (folding modification destination);PROTEIN WITH BINDING FUNCTION OR COFACTOR REQUIREMENT (structural or catalytic);CELLULAR TRANSPORT TRANSPORT FACILITIES AND TRANSPORT ROUTES	SUBCELLULAR LOCALIZATION	1673	0	PROTEIN WITH BINDING FUNCTION OR COFACTOR REQUIREMENT (structural or catalytic)	1085	1
mc16000872	PROTEIN WITH BINDING FUNCTION OR COFACTOR REQUIREMENT (structural or catalytic);INTERACTION WITH THE ENVIRONMENT	SUBCELLULAR LOCALIZATION	1664	0	INTERACTION WITH THE ENVIRONMENT	1256	1
mc11000796	CELL CYCLE AND DNA PROCESSING;PROTEIN FATE (folding modification destination);PROTEIN WITH BINDING FUNCTION OR COFACTOR REQUIREMENT (structural or catalytic);REGULATION OF METABOLISM AND PROTEIN FUNCTION;CELLULAR COMMUNICATION/SIGNAL TRANSDUCTION MECHANISM;CELL FATE;SUBCELLULAR LOCALIZATION	METABOLISM	1659	0	PROTEIN FATE (folding modification destination)	1365	1
mc13000926	TRANSCRIPTION;CELLULAR COMMUNICATION/SIGNAL TRANSDUCTION MECHANISM;CELL TYPE DIFFERENTIATION	PROTEIN WITH BINDING FUNCTION OR COFACTOR REQUIREMENT (structural or catalytic)	1657	0	TRANSCRIPTION	1481	1
mc7002965	CELLULAR COMMUNICATION/SIGNAL TRANSDUCTION MECHANISM	SUBCELLULAR LOCALIZATION	1656	0	CELLULAR COMMUNICATION/SIGNAL TRANSDUCTION MECHANISM	707	1
mc3000574	TRANSCRIPTION;PROTEIN WITH BINDING FUNCTION OR COFACTOR REQUIREMENT (structural or catalytic);ORGAN DIFFERENTIATION	CELLULAR COMMUNICATION/SIGNAL TRANSDUCTION MECHANISM	1596	0	TRANSCRIPTION	1350	1
mc6000623	METABOLISM;SUBCELLULAR LOCALIZATION	PROTEIN WITH BINDING FUNCTION OR COFACTOR REQUIREMENT (structural or catalytic)	1572	0	METABOLISM	1476	1
mc8001760	PROTEIN WITH BINDING FUNCTION OR COFACTOR REQUIREMENT (structural or catalytic);CELLULAR COMMUNICATION/SIGNAL TRANSDUCTION MECHANISM	SUBCELLULAR LOCALIZATION	1563	0	PROTEIN WITH BINDING FUNCTION OR COFACTOR REQUIREMENT (structural or catalytic)	1074	1
mc9000466	PROTEIN FATE (folding modification destination)	METABOLISM	1563	0	PROTEIN FATE (folding modification destination)	1544	1
mc6001673	PROTEIN WITH BINDING FUNCTION OR COFACTOR REQUIREMENT (structural or catalytic);CELLULAR TRANSPORT TRANSPORT FACILITIES AND TRANSPORT ROUTES;SUBCELLULAR LOCALIZATION	INTERACTION WITH THE ENVIRONMENT	1562	0	PROTEIN WITH BINDING FUNCTION OR COFACTOR REQUIREMENT (structural or catalytic)	1135	1
mc9000380	INTERACTION WITH THE ENVIRONMENT;SUBCELLULAR LOCALIZATION	PROTEIN WITH BINDING FUNCTION OR COFACTOR REQUIREMENT (structural or catalytic)	1552	0	INTERACTION WITH THE ENVIRONMENT	1551	1
mc9000705	CELLULAR COMMUNICATION/SIGNAL TRANSDUCTION MECHANISM;INTERACTION WITH THE ENVIRONMENT;BIOGENESIS OF CELLULAR COMPONENTS;SUBCELLULAR LOCALIZATION	PROTEIN WITH BINDING FUNCTION OR COFACTOR REQUIREMENT (structural or catalytic)	1520	0	SUBCELLULAR LOCALIZATION	1517	1
mc13001214	PROTEIN WITH BINDING FUNCTION OR COFACTOR REQUIREMENT (structural or catalytic);REGULATION OF METABOLISM AND PROTEIN FUNCTION;INTERACTION WITH THE ENVIRONMENT	TRANSCRIPTION	1517	0	PROTEIN WITH BINDING FUNCTION OR COFACTOR REQUIREMENT (structural or catalytic)	1517	1
mc13000407	SUBCELLULAR LOCALIZATION	CELLULAR COMMUNICATION/SIGNAL TRANSDUCTION MECHANISM	1501	0	SUBCELLULAR LOCALIZATION	1501	1
mc17000478	ENERGY;BIOGENESIS OF CELLULAR COMPONENTS;SUBCELLULAR LOCALIZATION	METABOLISM	1490	0	SUBCELLULAR LOCALIZATION	1256	1
mc6000283	CELLULAR COMMUNICATION/SIGNAL TRANSDUCTION MECHANISM;DEVELOPMENT (Systemic);CELL TYPE DIFFERENTIATION;TISSUE DIFFERENTIATION;ORGAN DIFFERENTIATION	SUBCELLULAR LOCALIZATION	1464	0	CELLULAR COMMUNICATION/SIGNAL TRANSDUCTION MECHANISM	1421	1
mc2002119	METABOLISM;PROTEIN WITH BINDING FUNCTION OR COFACTOR REQUIREMENT (structural or catalytic);CELLULAR COMMUNICATION/SIGNAL TRANSDUCTION MECHANISM	SUBCELLULAR LOCALIZATION	1454	0	PROTEIN WITH BINDING FUNCTION OR COFACTOR REQUIREMENT (structural or catalytic)	1064	1
mc3001504	PROTEIN WITH BINDING FUNCTION OR COFACTOR REQUIREMENT (structural or catalytic);REGULATION OF METABOLISM AND PROTEIN FUNCTION	SUBCELLULAR LOCALIZATION	1434	0	PROTEIN WITH BINDING FUNCTION OR COFACTOR REQUIREMENT (structural or catalytic)	997	1
mcx000243	PROTEIN WITH BINDING FUNCTION OR COFACTOR REQUIREMENT (structural or catalytic);CELLULAR TRANSPORT TRANSPORT FACILITIES AND TRANSPORT ROUTES;INTERACTION WITH THE ENVIRONMENT;BIOGENESIS OF CELLULAR COMPONENTS;TISSUE LOCALIZATION	SUBCELLULAR LOCALIZATION	1427	0	PROTEIN WITH BINDING FUNCTION OR COFACTOR REQUIREMENT (structural or catalytic)	1127	1
mc2002364	PROTEIN WITH BINDING FUNCTION OR COFACTOR REQUIREMENT (structural or catalytic);CELLULAR COMMUNICATION/SIGNAL TRANSDUCTION MECHANISM;SYSTEMIC INTERACTION WITH THE ENVIRONMENT;CELL FATE;DEVELOPMENT (Systemic)	SUBCELLULAR LOCALIZATION	1426	0	PROTEIN WITH BINDING FUNCTION OR COFACTOR REQUIREMENT (structural or catalytic)	1191	1
mc9000854	INTERACTION WITH THE ENVIRONMENT;BIOGENESIS OF CELLULAR COMPONENTS;SUBCELLULAR LOCALIZATION	PROTEIN WITH BINDING FUNCTION OR COFACTOR REQUIREMENT (structural or catalytic)	1425	0	BIOGENESIS OF CELLULAR COMPONENTS	1425	1
mc3001960	CELL CYCLE AND DNA PROCESSING;INTERACTION WITH THE ENVIRONMENT	SUBCELLULAR LOCALIZATION	1398	0	INTERACTION WITH THE ENVIRONMENT	627	1
mcx001023	METABOLISM;PROTEIN FATE (folding modification destination);SUBCELLULAR LOCALIZATION	PROTEIN WITH BINDING FUNCTION OR COFACTOR REQUIREMENT (structural or catalytic)	1378	0	SUBCELLULAR LOCALIZATION	711	1
mc6002136	PROTEIN WITH BINDING FUNCTION OR COFACTOR REQUIREMENT (structural or catalytic);REGULATION OF METABOLISM AND PROTEIN FUNCTION;BIOGENESIS OF CELLULAR COMPONENTS;SUBCELLULAR LOCALIZATION	CELLULAR COMMUNICATION/SIGNAL TRANSDUCTION MECHANISM	1374	0	PROTEIN WITH BINDING FUNCTION OR COFACTOR REQUIREMENT (structural or catalytic)	198	1
mc8002032	SYSTEMIC INTERACTION WITH THE ENVIRONMENT;SUBCELLULAR LOCALIZATION;ORGAN LOCALIZATION	REGULATION OF METABOLISM AND PROTEIN FUNCTION	1363	0	SUBCELLULAR LOCALIZATION	969	1
mc8001767	ENERGY;PROTEIN WITH BINDING FUNCTION OR COFACTOR REQUIREMENT (structural or catalytic);CELLULAR TRANSPORT TRANSPORT FACILITIES AND TRANSPORT ROUTES	SUBCELLULAR LOCALIZATION	1354	0	PROTEIN WITH BINDING FUNCTION OR COFACTOR REQUIREMENT (structural or catalytic)	941	1
mc11001481	METABOLISM;CELL CYCLE AND DNA PROCESSING;BIOGENESIS OF CELLULAR COMPONENTS;SUBCELLULAR LOCALIZATION	CELLULAR COMMUNICATION/SIGNAL TRANSDUCTION MECHANISM	1344	0	METABOLISM	1203	1
mc11002642	PROTEIN FATE (folding modification destination);PROTEIN WITH BINDING FUNCTION OR COFACTOR REQUIREMENT (structural or catalytic);CELLULAR COMMUNICATION/SIGNAL TRANSDUCTION MECHANISM	SUBCELLULAR LOCALIZATION	1334	0	CELLULAR COMMUNICATION/SIGNAL TRANSDUCTION MECHANISM	1230	1
mc1001109	PROTEIN WITH BINDING FUNCTION OR COFACTOR REQUIREMENT (structural or catalytic);REGULATION OF METABOLISM AND PROTEIN FUNCTION;CELLULAR COMMUNICATION/SIGNAL TRANSDUCTION MECHANISM;SUBCELLULAR LOCALIZATION	PROTEIN FATE (folding modification destination)	1330	0	PROTEIN WITH BINDING FUNCTION OR COFACTOR REQUIREMENT (structural or catalytic)	1205	1
mc16001098	PROTEIN WITH BINDING FUNCTION OR COFACTOR REQUIREMENT (structural or catalytic);CELLULAR COMMUNICATION/SIGNAL TRANSDUCTION MECHANISM;INTERACTION WITH THE ENVIRONMENT;BIOGENESIS OF CELLULAR COMPONENTS;TISSUE DIFFERENTIATION;ORGAN DIFFERENTIATION	SUBCELLULAR LOCALIZATION	1328	0	PROTEIN WITH BINDING FUNCTION OR COFACTOR REQUIREMENT (structural or catalytic)	667	1
mc19000019	PROTEIN FATE (folding modification destination);CELL RESCUE DEFENSE AND VIRULENCE;SUBCELLULAR LOCALIZATION	PROTEIN WITH BINDING FUNCTION OR COFACTOR REQUIREMENT (structural or catalytic)	1323	0	PROTEIN FATE (folding modification destination)	766	1
mc1001591	SYSTEMIC INTERACTION WITH THE ENVIRONMENT	SUBCELLULAR LOCALIZATION	1321	0	SYSTEMIC INTERACTION WITH THE ENVIRONMENT	760	1
mc3001441	INTERACTION WITH THE ENVIRONMENT;CELL FATE	SUBCELLULAR LOCALIZATION	1296	0	INTERACTION WITH THE ENVIRONMENT	694	1
mc7000373	PROTEIN WITH BINDING FUNCTION OR COFACTOR REQUIREMENT (structural or catalytic)	SUBCELLULAR LOCALIZATION	1289	0	PROTEIN WITH BINDING FUNCTION OR COFACTOR REQUIREMENT (structural or catalytic)	1238	1
mc10001440	CELLULAR TRANSPORT TRANSPORT FACILITIES AND TRANSPORT ROUTES;CELLULAR COMMUNICATION/SIGNAL TRANSDUCTION MECHANISM;SUBCELLULAR LOCALIZATION	PROTEIN WITH BINDING FUNCTION OR COFACTOR REQUIREMENT (structural or catalytic)	1254	0	SUBCELLULAR LOCALIZATION	831	1
mc15001126	PROTEIN WITH BINDING FUNCTION OR COFACTOR REQUIREMENT (structural or catalytic);REGULATION OF METABOLISM AND PROTEIN FUNCTION;CELLULAR TRANSPORT TRANSPORT FACILITIES AND TRANSPORT ROUTES	SUBCELLULAR LOCALIZATION	1234	0	PROTEIN WITH BINDING FUNCTION OR COFACTOR REQUIREMENT (structural or catalytic)	1152	1
mc16000673	CELL CYCLE AND DNA PROCESSING	PROTEIN WITH BINDING FUNCTION OR COFACTOR REQUIREMENT (structural or catalytic)	1219	0	CELL CYCLE AND DNA PROCESSING	1093	1
mc5001530	SYSTEMIC INTERACTION WITH THE ENVIRONMENT;SUBCELLULAR LOCALIZATION;ORGAN LOCALIZATION	ORGAN DIFFERENTIATION	1212	0	SUBCELLULAR LOCALIZATION	1212	1
mc14001239	PROTEIN WITH BINDING FUNCTION OR COFACTOR REQUIREMENT (structural or catalytic)	TRANSCRIPTION	1210	0	PROTEIN WITH BINDING FUNCTION OR COFACTOR REQUIREMENT (structural or catalytic)	1210	1
mc14001625	PROTEIN WITH BINDING FUNCTION OR COFACTOR REQUIREMENT (structural or catalytic);SUBCELLULAR LOCALIZATION	METABOLISM	1203	0	PROTEIN WITH BINDING FUNCTION OR COFACTOR REQUIREMENT (structural or catalytic)	1203	1
mc5000970	TRANSCRIPTION;PROTEIN WITH BINDING FUNCTION OR COFACTOR REQUIREMENT (structural or catalytic);SUBCELLULAR LOCALIZATION	METABOLISM	1195	0	TRANSCRIPTION	1195	1
mc4000723	SUBCELLULAR LOCALIZATION	METABOLISM	1186	0	SUBCELLULAR LOCALIZATION	979	1
mc15000585	CELLULAR TRANSPORT TRANSPORT FACILITIES AND TRANSPORT ROUTES;SUBCELLULAR LOCALIZATION;ORGAN LOCALIZATION	PROTEIN WITH BINDING FUNCTION OR COFACTOR REQUIREMENT (structural or catalytic)	1148	0	SUBCELLULAR LOCALIZATION	957	1
mc7000332	CELL CYCLE AND DNA PROCESSING;SYSTEMIC INTERACTION WITH THE ENVIRONMENT;BIOGENESIS OF CELLULAR COMPONENTS;SUBCELLULAR LOCALIZATION	PROTEIN WITH BINDING FUNCTION OR COFACTOR REQUIREMENT (structural or catalytic)	1118	0	SUBCELLULAR LOCALIZATION	997	1
mc4000509	PROTEIN WITH BINDING FUNCTION OR COFACTOR REQUIREMENT (structural or catalytic)	SUBCELLULAR LOCALIZATION	1117	0	PROTEIN WITH BINDING FUNCTION OR COFACTOR REQUIREMENT (structural or catalytic)	843	1
mc12000724	PROTEIN WITH BINDING FUNCTION OR COFACTOR REQUIREMENT (structural or catalytic);CELLULAR TRANSPORT TRANSPORT FACILITIES AND TRANSPORT ROUTES;BIOGENESIS OF CELLULAR COMPONENTS	SUBCELLULAR LOCALIZATION	1112	0	PROTEIN WITH BINDING FUNCTION OR COFACTOR REQUIREMENT (structural or catalytic)	1023	1
mc9002011	REGULATION OF METABOLISM AND PROTEIN FUNCTION;SUBCELLULAR LOCALIZATION	PROTEIN WITH BINDING FUNCTION OR COFACTOR REQUIREMENT (structural or catalytic)	1091	0	SUBCELLULAR LOCALIZATION	1091	1
mc19000367	PROTEIN WITH BINDING FUNCTION OR COFACTOR REQUIREMENT (structural or catalytic)	PROTEIN FATE (folding modification destination)	1088	0	PROTEIN WITH BINDING FUNCTION OR COFACTOR REQUIREMENT (structural or catalytic)	1088	1
mc7000492	PROTEIN WITH BINDING FUNCTION OR COFACTOR REQUIREMENT (structural or catalytic)	CELL FATE	1087	0	PROTEIN WITH BINDING FUNCTION OR COFACTOR REQUIREMENT (structural or catalytic)	1018	1
mc6001895	BIOGENESIS OF CELLULAR COMPONENTS;SUBCELLULAR LOCALIZATION	PROTEIN WITH BINDING FUNCTION OR COFACTOR REQUIREMENT (structural or catalytic)	1084	0	BIOGENESIS OF CELLULAR COMPONENTS	1039	1
mc7000305	CELLULAR COMMUNICATION/SIGNAL TRANSDUCTION MECHANISM	SUBCELLULAR LOCALIZATION	1074	0	CELLULAR COMMUNICATION/SIGNAL TRANSDUCTION MECHANISM	288	1
mc17001858	METABOLISM	SUBCELLULAR LOCALIZATION	1061	0	METABOLISM	1011	1
mc5001978	METABOLISM;ENERGY;CELL CYCLE AND DNA PROCESSING;CELLULAR TRANSPORT TRANSPORT FACILITIES AND TRANSPORT ROUTES;CELLULAR COMMUNICATION/SIGNAL TRANSDUCTION MECHANISM;CELL RESCUE DEFENSE AND VIRULENCE;INTERACTION WITH THE ENVIRONMENT;SYSTEMIC INTERACTION WITH THE ENVIRONMENT;SUBCELLULAR LOCALIZATION	PROTEIN WITH BINDING FUNCTION OR COFACTOR REQUIREMENT (structural or catalytic)	1054	0	CELLULAR COMMUNICATION/SIGNAL TRANSDUCTION MECHANISM	933	1
mc11002413	TRANSCRIPTION;CELLULAR COMMUNICATION/SIGNAL TRANSDUCTION MECHANISM;SUBCELLULAR LOCALIZATION	PROTEIN WITH BINDING FUNCTION OR COFACTOR REQUIREMENT (structural or catalytic)	1030	0	CELLULAR COMMUNICATION/SIGNAL TRANSDUCTION MECHANISM	927	1
mc6000682	PROTEIN FATE (folding modification destination);CELLULAR COMMUNICATION/SIGNAL TRANSDUCTION MECHANISM;SUBCELLULAR LOCALIZATION	PROTEIN WITH BINDING FUNCTION OR COFACTOR REQUIREMENT (structural or catalytic)	1023	0	SUBCELLULAR LOCALIZATION	852	1
mc5001983	BIOGENESIS OF CELLULAR COMPONENTS;SUBCELLULAR LOCALIZATION	PROTEIN WITH BINDING FUNCTION OR COFACTOR REQUIREMENT (structural or catalytic)	1019	0	SUBCELLULAR LOCALIZATION	1004	1
mc16000309	PROTEIN WITH BINDING FUNCTION OR COFACTOR REQUIREMENT (structural or catalytic);CELLULAR TRANSPORT TRANSPORT FACILITIES AND TRANSPORT ROUTES;CELL RESCUE DEFENSE AND VIRULENCE;SUBCELLULAR LOCALIZATION	METABOLISM	988	0	PROTEIN WITH BINDING FUNCTION OR COFACTOR REQUIREMENT (structural or catalytic)	988	1
mc14001635	CELLULAR COMMUNICATION/SIGNAL TRANSDUCTION MECHANISM;INTERACTION WITH THE ENVIRONMENT	SUBCELLULAR LOCALIZATION	985	0	INTERACTION WITH THE ENVIRONMENT	816	1
mc6001952	METABOLISM	SUBCELLULAR LOCALIZATION	985	0	METABOLISM	793	1
mc1001667	SUBCELLULAR LOCALIZATION	PROTEIN WITH BINDING FUNCTION OR COFACTOR REQUIREMENT (structural or catalytic)	982	0	SUBCELLULAR LOCALIZATION	823	1
mc9001992	PROTEIN WITH BINDING FUNCTION OR COFACTOR REQUIREMENT (structural or catalytic)	SUBCELLULAR LOCALIZATION	980	0	PROTEIN WITH BINDING FUNCTION OR COFACTOR REQUIREMENT (structural or catalytic)	536	1
mc15000145	PROTEIN FATE (folding modification destination);CELLULAR COMMUNICATION/SIGNAL TRANSDUCTION MECHANISM;SUBCELLULAR LOCALIZATION	METABOLISM	978	0	PROTEIN FATE (folding modification destination)	978	1
mc2000388	REGULATION OF METABOLISM AND PROTEIN FUNCTION;CELLULAR COMMUNICATION/SIGNAL TRANSDUCTION MECHANISM	PROTEIN WITH BINDING FUNCTION OR COFACTOR REQUIREMENT (structural or catalytic)	970	0	CELLULAR COMMUNICATION/SIGNAL TRANSDUCTION MECHANISM	833	1
mc11000406	PROTEIN SYNTHESIS;SUBCELLULAR LOCALIZATION	PROTEIN FATE (folding modification destination)	959	0	SUBCELLULAR LOCALIZATION	811	1
mc1001461	BIOGENESIS OF CELLULAR COMPONENTS;SUBCELLULAR LOCALIZATION	PROTEIN WITH BINDING FUNCTION OR COFACTOR REQUIREMENT (structural or catalytic)	953	0	BIOGENESIS OF CELLULAR COMPONENTS	953	1
mc10001639	SUBCELLULAR LOCALIZATION	REGULATION OF METABOLISM AND PROTEIN FUNCTION	933	0	SUBCELLULAR LOCALIZATION	222	1
mc7000511	DEVELOPMENT (Systemic);ORGAN DIFFERENTIATION;SUBCELLULAR LOCALIZATION	PROTEIN WITH BINDING FUNCTION OR COFACTOR REQUIREMENT (structural or catalytic)	931	0	SUBCELLULAR LOCALIZATION	746	1
mc17000857	CELL RESCUE DEFENSE AND VIRULENCE	SYSTEMIC INTERACTION WITH THE ENVIRONMENT	922	0	CELL RESCUE DEFENSE AND VIRULENCE	804	1
mc8000884	PROTEIN WITH BINDING FUNCTION OR COFACTOR REQUIREMENT (structural or catalytic);BIOGENESIS OF CELLULAR COMPONENTS;SUBCELLULAR LOCALIZATION	METABOLISM	921	0	SUBCELLULAR LOCALIZATION	904	1
mc2002121	METABOLISM;SYSTEMIC INTERACTION WITH THE ENVIRONMENT;SUBCELLULAR LOCALIZATION	PROTEIN WITH BINDING FUNCTION OR COFACTOR REQUIREMENT (structural or catalytic)	920	0	SUBCELLULAR LOCALIZATION	869	1
mc19000098	CELL CYCLE AND DNA PROCESSING;PROTEIN WITH BINDING FUNCTION OR COFACTOR REQUIREMENT (structural or catalytic);REGULATION OF METABOLISM AND PROTEIN FUNCTION;SUBCELLULAR LOCALIZATION	CELLULAR COMMUNICATION/SIGNAL TRANSDUCTION MECHANISM	917	0	REGULATION OF METABOLISM AND PROTEIN FUNCTION	740	1
mc4002123	CELL CYCLE AND DNA PROCESSING;SUBCELLULAR LOCALIZATION	PROTEIN WITH BINDING FUNCTION OR COFACTOR REQUIREMENT (structural or catalytic)	906	0	SUBCELLULAR LOCALIZATION	735	1
mc2002368	PROTEIN WITH BINDING FUNCTION OR COFACTOR REQUIREMENT (structural or catalytic);CELL RESCUE DEFENSE AND VIRULENCE	PROTEIN FATE (folding modification destination)	895	0	PROTEIN WITH BINDING FUNCTION OR COFACTOR REQUIREMENT (structural or catalytic)	895	1
mc7002270	PROTEIN SYNTHESIS	SUBCELLULAR LOCALIZATION	892	0	PROTEIN SYNTHESIS	773	1
mc1000200	PROTEIN FATE (folding modification destination);CELLULAR TRANSPORT TRANSPORT FACILITIES AND TRANSPORT ROUTES	SUBCELLULAR LOCALIZATION	888	0	PROTEIN FATE (folding modification destination)	634	1
mc15000144	PROTEIN WITH BINDING FUNCTION OR COFACTOR REQUIREMENT (structural or catalytic);SUBCELLULAR LOCALIZATION	TRANSCRIPTION	884	0	PROTEIN WITH BINDING FUNCTION OR COFACTOR REQUIREMENT (structural or catalytic)	884	1
mc10000779	TRANSCRIPTION;CELL RESCUE DEFENSE AND VIRULENCE;SUBCELLULAR LOCALIZATION	PROTEIN WITH BINDING FUNCTION OR COFACTOR REQUIREMENT (structural or catalytic)	883	0	SUBCELLULAR LOCALIZATION	475	1
mc12001288	TRANSCRIPTION;PROTEIN WITH BINDING FUNCTION OR COFACTOR REQUIREMENT (structural or catalytic);SUBCELLULAR LOCALIZATION	METABOLISM	862	0	TRANSCRIPTION	862	1
mc9000263	CELL CYCLE AND DNA PROCESSING;TRANSCRIPTION;PROTEIN FATE (folding modification destination);PROTEIN WITH BINDING FUNCTION OR COFACTOR REQUIREMENT (structural or catalytic);BIOGENESIS OF CELLULAR COMPONENTS;SUBCELLULAR LOCALIZATION	METABOLISM	857	0	SUBCELLULAR LOCALIZATION	663	1
mcx000434	CELLULAR COMMUNICATION/SIGNAL TRANSDUCTION MECHANISM	SUBCELLULAR LOCALIZATION	855	0	CELLULAR COMMUNICATION/SIGNAL TRANSDUCTION MECHANISM	814	1
mc10001152	PROTEIN FATE (folding modification destination);CELLULAR TRANSPORT TRANSPORT FACILITIES AND TRANSPORT ROUTES;BIOGENESIS OF CELLULAR COMPONENTS;SUBCELLULAR LOCALIZATION	PROTEIN WITH BINDING FUNCTION OR COFACTOR REQUIREMENT (structural or catalytic)	843	0	CELLULAR TRANSPORT TRANSPORT FACILITIES AND TRANSPORT ROUTES	843	1
mc19000146	PROTEIN WITH BINDING FUNCTION OR COFACTOR REQUIREMENT (structural or catalytic);CELLULAR COMMUNICATION/SIGNAL TRANSDUCTION MECHANISM	METABOLISM	843	0	PROTEIN WITH BINDING FUNCTION OR COFACTOR REQUIREMENT (structural or catalytic)	843	1
mcx001003	CELLULAR COMMUNICATION/SIGNAL TRANSDUCTION MECHANISM;INTERACTION WITH THE ENVIRONMENT;SYSTEMIC INTERACTION WITH THE ENVIRONMENT	PROTEIN WITH BINDING FUNCTION OR COFACTOR REQUIREMENT (structural or catalytic)	834	0	CELLULAR COMMUNICATION/SIGNAL TRANSDUCTION MECHANISM	834	1
mc11002143	CELL CYCLE AND DNA PROCESSING;SUBCELLULAR LOCALIZATION	PROTEIN WITH BINDING FUNCTION OR COFACTOR REQUIREMENT (structural or catalytic)	829	0	SUBCELLULAR LOCALIZATION	829	1
mc1002237	CELLULAR COMMUNICATION/SIGNAL TRANSDUCTION MECHANISM	SUBCELLULAR LOCALIZATION	828	0	CELLULAR COMMUNICATION/SIGNAL TRANSDUCTION MECHANISM	790	1
mc7000369	PROTEIN FATE (folding modification destination);PROTEIN WITH BINDING FUNCTION OR COFACTOR REQUIREMENT (structural or catalytic);SUBCELLULAR LOCALIZATION	CELLULAR COMMUNICATION/SIGNAL TRANSDUCTION MECHANISM	816	0	PROTEIN WITH BINDING FUNCTION OR COFACTOR REQUIREMENT (structural or catalytic)	523	1
mc3002238	REGULATION OF METABOLISM AND PROTEIN FUNCTION;CELLULAR TRANSPORT TRANSPORT FACILITIES AND TRANSPORT ROUTES;CELLULAR COMMUNICATION/SIGNAL TRANSDUCTION MECHANISM;SYSTEMIC INTERACTION WITH THE ENVIRONMENT;SUBCELLULAR LOCALIZATION	PROTEIN WITH BINDING FUNCTION OR COFACTOR REQUIREMENT (structural or catalytic)	799	0	CELLULAR COMMUNICATION/SIGNAL TRANSDUCTION MECHANISM	672	1
mc1002350	SUBCELLULAR LOCALIZATION	PROTEIN WITH BINDING FUNCTION OR COFACTOR REQUIREMENT (structural or catalytic)	791	0	SUBCELLULAR LOCALIZATION	791	1
mc19000378	SUBCELLULAR LOCALIZATION	CELL RESCUE DEFENSE AND VIRULENCE	789	0	SUBCELLULAR LOCALIZATION	789	1
mc2002261	PROTEIN WITH BINDING FUNCTION OR COFACTOR REQUIREMENT (structural or catalytic);CELLULAR TRANSPORT TRANSPORT FACILITIES AND TRANSPORT ROUTES;BIOGENESIS OF CELLULAR COMPONENTS;SUBCELLULAR LOCALIZATION	PROTEIN FATE (folding modification destination)	785	0	CELLULAR TRANSPORT TRANSPORT FACILITIES AND TRANSPORT ROUTES	785	1
mc7001032	REGULATION OF METABOLISM AND PROTEIN FUNCTION;SUBCELLULAR LOCALIZATION	PROTEIN WITH BINDING FUNCTION OR COFACTOR REQUIREMENT (structural or catalytic)	781	0	SUBCELLULAR LOCALIZATION	634	1
mc7002123	PROTEIN WITH BINDING FUNCTION OR COFACTOR REQUIREMENT (structural or catalytic);CELL RESCUE DEFENSE AND VIRULENCE	CELL FATE	781	0	PROTEIN WITH BINDING FUNCTION OR COFACTOR REQUIREMENT (structural or catalytic)	774	1
mc15000455	SUBCELLULAR LOCALIZATION	ORGAN DIFFERENTIATION	776	0	SUBCELLULAR LOCALIZATION	412	1
mc18000416	PROTEIN WITH BINDING FUNCTION OR COFACTOR REQUIREMENT (structural or catalytic);CELLULAR TRANSPORT TRANSPORT FACILITIES AND TRANSPORT ROUTES;SUBCELLULAR LOCALIZATION	METABOLISM	771	0	PROTEIN WITH BINDING FUNCTION OR COFACTOR REQUIREMENT (structural or catalytic)	771	1
mc11002348	CELLULAR COMMUNICATION/SIGNAL TRANSDUCTION MECHANISM;INTERACTION WITH THE ENVIRONMENT;SUBCELLULAR LOCALIZATION	PROTEIN WITH BINDING FUNCTION OR COFACTOR REQUIREMENT (structural or catalytic)	765	0	INTERACTION WITH THE ENVIRONMENT	765	1
mcx000340	CELLULAR TRANSPORT TRANSPORT FACILITIES AND TRANSPORT ROUTES;SUBCELLULAR LOCALIZATION	PROTEIN WITH BINDING FUNCTION OR COFACTOR REQUIREMENT (structural or catalytic)	759	0	CELLULAR TRANSPORT TRANSPORT FACILITIES AND TRANSPORT ROUTES	759	1
mc8000501	METABOLISM;PROTEIN WITH BINDING FUNCTION OR COFACTOR REQUIREMENT (structural or catalytic);CELL RESCUE DEFENSE AND VIRULENCE;SUBCELLULAR LOCALIZATION	CELLULAR TRANSPORT TRANSPORT FACILITIES AND TRANSPORT ROUTES	755	0	SUBCELLULAR LOCALIZATION	755	1
mcx001540	TRANSCRIPTION;PROTEIN WITH BINDING FUNCTION OR COFACTOR REQUIREMENT (structural or catalytic)	SUBCELLULAR LOCALIZATION	755	0	TRANSCRIPTION	709	1
mc1002478	INTERACTION WITH THE ENVIRONMENT;BIOGENESIS OF CELLULAR COMPONENTS;SUBCELLULAR LOCALIZATION	PROTEIN WITH BINDING FUNCTION OR COFACTOR REQUIREMENT (structural or catalytic)	747	0	SUBCELLULAR LOCALIZATION	493	1
mc10000451	CELL CYCLE AND DNA PROCESSING;BIOGENESIS OF CELLULAR COMPONENTS;SUBCELLULAR LOCALIZATION	PROTEIN WITH BINDING FUNCTION OR COFACTOR REQUIREMENT (structural or catalytic)	745	0	BIOGENESIS OF CELLULAR COMPONENTS	745	1
mc15000639	PROTEIN WITH BINDING FUNCTION OR COFACTOR REQUIREMENT (structural or catalytic);BIOGENESIS OF CELLULAR COMPONENTS;SUBCELLULAR LOCALIZATION	CELL CYCLE AND DNA PROCESSING	739	0	PROTEIN WITH BINDING FUNCTION OR COFACTOR REQUIREMENT (structural or catalytic)	739	1
mc2002035	PROTEIN WITH BINDING FUNCTION OR COFACTOR REQUIREMENT (structural or catalytic);REGULATION OF METABOLISM AND PROTEIN FUNCTION;CELLULAR COMMUNICATION/SIGNAL TRANSDUCTION MECHANISM;CELL FATE;DEVELOPMENT (Systemic)	SUBCELLULAR LOCALIZATION	736	0	DEVELOPMENT (Systemic)	707	1
mc7001761	PROTEIN WITH BINDING FUNCTION OR COFACTOR REQUIREMENT (structural or catalytic);SUBCELLULAR LOCALIZATION	PROTEIN FATE (folding modification destination)	732	0	PROTEIN WITH BINDING FUNCTION OR COFACTOR REQUIREMENT (structural or catalytic)	732	1
mc7002019	PROTEIN WITH BINDING FUNCTION OR COFACTOR REQUIREMENT (structural or catalytic);CELLULAR TRANSPORT TRANSPORT FACILITIES AND TRANSPORT ROUTES;SUBCELLULAR LOCALIZATION	PROTEIN FATE (folding modification destination)	727	0	SUBCELLULAR LOCALIZATION	727	1
mc7002285	TRANSCRIPTION;PROTEIN FATE (folding modification destination);PROTEIN WITH BINDING FUNCTION OR COFACTOR REQUIREMENT (structural or catalytic);REGULATION OF METABOLISM AND PROTEIN FUNCTION	METABOLISM	720	0	PROTEIN FATE (folding modification destination)	720	1
mc1000375	METABOLISM;CELLULAR COMMUNICATION/SIGNAL TRANSDUCTION MECHANISM	REGULATION OF METABOLISM AND PROTEIN FUNCTION	713	0	CELLULAR COMMUNICATION/SIGNAL TRANSDUCTION MECHANISM	713	1
mc1001087	CELLULAR TRANSPORT TRANSPORT FACILITIES AND TRANSPORT ROUTES;SUBCELLULAR LOCALIZATION	PROTEIN WITH BINDING FUNCTION OR COFACTOR REQUIREMENT (structural or catalytic)	707	0	CELLULAR TRANSPORT TRANSPORT FACILITIES AND TRANSPORT ROUTES	707	1
mc1001238	METABOLISM;PROTEIN WITH BINDING FUNCTION OR COFACTOR REQUIREMENT (structural or catalytic);CELLULAR COMMUNICATION/SIGNAL TRANSDUCTION MECHANISM;INTERACTION WITH THE ENVIRONMENT	PROTEIN FATE (folding modification destination)	699	0	PROTEIN WITH BINDING FUNCTION OR COFACTOR REQUIREMENT (structural or catalytic)	690	1
mc14001211	PROTEIN WITH BINDING FUNCTION OR COFACTOR REQUIREMENT (structural or catalytic)	ENERGY	686	0	PROTEIN WITH BINDING FUNCTION OR COFACTOR REQUIREMENT (structural or catalytic)	686	1
mc11000117	TRANSCRIPTION;PROTEIN WITH BINDING FUNCTION OR COFACTOR REQUIREMENT (structural or catalytic);SUBCELLULAR LOCALIZATION	CELL CYCLE AND DNA PROCESSING	683	0	TRANSCRIPTION	683	1
mc7000932	REGULATION OF METABOLISM AND PROTEIN FUNCTION	SUBCELLULAR LOCALIZATION	676	0	REGULATION OF METABOLISM AND PROTEIN FUNCTION	345	1
mc18001147	ENERGY;PROTEIN WITH BINDING FUNCTION OR COFACTOR REQUIREMENT (structural or catalytic);SUBCELLULAR LOCALIZATION	METABOLISM	667	0	ENERGY	667	1
mc1002704	CELLULAR COMMUNICATION/SIGNAL TRANSDUCTION MECHANISM;SYSTEMIC INTERACTION WITH THE ENVIRONMENT	SUBCELLULAR LOCALIZATION	665	0	SYSTEMIC INTERACTION WITH THE ENVIRONMENT	431	1
mc11001509	PROTEIN WITH BINDING FUNCTION OR COFACTOR REQUIREMENT (structural or catalytic)	TRANSCRIPTION	662	0	PROTEIN WITH BINDING FUNCTION OR COFACTOR REQUIREMENT (structural or catalytic)	620	1
mc1002231	TRANSCRIPTION;PROTEIN FATE (folding modification destination);SUBCELLULAR LOCALIZATION	PROTEIN WITH BINDING FUNCTION OR COFACTOR REQUIREMENT (structural or catalytic)	660	0	SUBCELLULAR LOCALIZATION	660	1
mc12001624	CELL CYCLE AND DNA PROCESSING;CELLULAR TRANSPORT TRANSPORT FACILITIES AND TRANSPORT ROUTES;SUBCELLULAR LOCALIZATION;ORGAN LOCALIZATION	PROTEIN WITH BINDING FUNCTION OR COFACTOR REQUIREMENT (structural or catalytic)	657	0	SUBCELLULAR LOCALIZATION	657	1
mc2003026	REGULATION OF METABOLISM AND PROTEIN FUNCTION;ORGAN LOCALIZATION	SUBCELLULAR LOCALIZATION	657	0	REGULATION OF METABOLISM AND PROTEIN FUNCTION	553	1
mc3001449	CELL CYCLE AND DNA PROCESSING;PROTEIN WITH BINDING FUNCTION OR COFACTOR REQUIREMENT (structural or catalytic);REGULATION OF METABOLISM AND PROTEIN FUNCTION;CELL TYPE DIFFERENTIATION	SUBCELLULAR LOCALIZATION	656	0	PROTEIN WITH BINDING FUNCTION OR COFACTOR REQUIREMENT (structural or catalytic)	69	1
mc11001322	TRANSCRIPTION;PROTEIN WITH BINDING FUNCTION OR COFACTOR REQUIREMENT (structural or catalytic)	SUBCELLULAR LOCALIZATION	642	0	PROTEIN WITH BINDING FUNCTION OR COFACTOR REQUIREMENT (structural or catalytic)	539	1
mc5001976	PROTEIN WITH BINDING FUNCTION OR COFACTOR REQUIREMENT (structural or catalytic)	SUBCELLULAR LOCALIZATION	639	0	PROTEIN WITH BINDING FUNCTION OR COFACTOR REQUIREMENT (structural or catalytic)	596	1
mc1001093	SYSTEMIC INTERACTION WITH THE ENVIRONMENT;CELL FATE;SUBCELLULAR LOCALIZATION;TISSUE LOCALIZATION	CELLULAR COMMUNICATION/SIGNAL TRANSDUCTION MECHANISM	634	0	SYSTEMIC INTERACTION WITH THE ENVIRONMENT	634	1
mc3001643	CELL CYCLE AND DNA PROCESSING;PROTEIN FATE (folding modification destination);PROTEIN WITH BINDING FUNCTION OR COFACTOR REQUIREMENT (structural or catalytic);SUBCELLULAR LOCALIZATION;TISSUE LOCALIZATION;ORGAN LOCALIZATION	METABOLISM	624	0	PROTEIN FATE (folding modification destination)	624	1
mc11000456	PROTEIN WITH BINDING FUNCTION OR COFACTOR REQUIREMENT (structural or catalytic);SYSTEMIC INTERACTION WITH THE ENVIRONMENT;DEVELOPMENT (Systemic);SUBCELLULAR LOCALIZATION;CELL TYPE LOCALIZATION;TISSUE LOCALIZATION	CELLULAR TRANSPORT TRANSPORT FACILITIES AND TRANSPORT ROUTES	622	0	PROTEIN WITH BINDING FUNCTION OR COFACTOR REQUIREMENT (structural or catalytic)	528	1
mc3002148	SUBCELLULAR LOCALIZATION	PROTEIN WITH BINDING FUNCTION OR COFACTOR REQUIREMENT (structural or catalytic)	613	0	SUBCELLULAR LOCALIZATION	87	1
mc6001204	PROTEIN WITH BINDING FUNCTION OR COFACTOR REQUIREMENT (structural or catalytic);CELLULAR TRANSPORT TRANSPORT FACILITIES AND TRANSPORT ROUTES;CELLULAR COMMUNICATION/SIGNAL TRANSDUCTION MECHANISM	PROTEIN FATE (folding modification destination)	613	0	PROTEIN WITH BINDING FUNCTION OR COFACTOR REQUIREMENT (structural or catalytic)	613	1
mc1002437	ENERGY;PROTEIN FATE (folding modification destination);SUBCELLULAR LOCALIZATION	METABOLISM	611	0	PROTEIN FATE (folding modification destination)	78	1
mc13000725	ENERGY;CELLULAR TRANSPORT TRANSPORT FACILITIES AND TRANSPORT ROUTES	SUBCELLULAR LOCALIZATION	605	0	ENERGY	576	1
mc7001157	CELLULAR COMMUNICATION/SIGNAL TRANSDUCTION MECHANISM	CELLULAR TRANSPORT TRANSPORT FACILITIES AND TRANSPORT ROUTES	598	0	CELLULAR COMMUNICATION/SIGNAL TRANSDUCTION MECHANISM	598	1
mc1001463	TRANSCRIPTION;PROTEIN WITH BINDING FUNCTION OR COFACTOR REQUIREMENT (structural or catalytic);SUBCELLULAR LOCALIZATION	ORGAN DIFFERENTIATION	597	0	TRANSCRIPTION	165	1
mc9002152	PROTEIN WITH BINDING FUNCTION OR COFACTOR REQUIREMENT (structural or catalytic);CELLULAR TRANSPORT TRANSPORT FACILITIES AND TRANSPORT ROUTES;CELLULAR COMMUNICATION/SIGNAL TRANSDUCTION MECHANISM	SUBCELLULAR LOCALIZATION	596	0	CELLULAR TRANSPORT TRANSPORT FACILITIES AND TRANSPORT ROUTES	524	1
mc14000754	CELLULAR COMMUNICATION/SIGNAL TRANSDUCTION MECHANISM;INTERACTION WITH THE ENVIRONMENT;SUBCELLULAR LOCALIZATION	PROTEIN WITH BINDING FUNCTION OR COFACTOR REQUIREMENT (structural or catalytic)	583	0	SUBCELLULAR LOCALIZATION	448	1
mc5002032	PROTEIN WITH BINDING FUNCTION OR COFACTOR REQUIREMENT (structural or catalytic);REGULATION OF METABOLISM AND PROTEIN FUNCTION;CELLULAR COMMUNICATION/SIGNAL TRANSDUCTION MECHANISM;SUBCELLULAR LOCALIZATION;ORGAN LOCALIZATION	CELL CYCLE AND DNA PROCESSING	582	0	PROTEIN WITH BINDING FUNCTION OR COFACTOR REQUIREMENT (structural or catalytic)	582	1
mc7001514	CELL CYCLE AND DNA PROCESSING;CELL FATE;SUBCELLULAR LOCALIZATION	PROTEIN WITH BINDING FUNCTION OR COFACTOR REQUIREMENT (structural or catalytic)	564	0	SUBCELLULAR LOCALIZATION	564	1
mc4000694	CELLULAR TRANSPORT TRANSPORT FACILITIES AND TRANSPORT ROUTES	SUBCELLULAR LOCALIZATION	563	0	CELLULAR TRANSPORT TRANSPORT FACILITIES AND TRANSPORT ROUTES	510	1
mc3001408	PROTEIN WITH BINDING FUNCTION OR COFACTOR REQUIREMENT (structural or catalytic);SYSTEMIC INTERACTION WITH THE ENVIRONMENT	SUBCELLULAR LOCALIZATION	561	0	PROTEIN WITH BINDING FUNCTION OR COFACTOR REQUIREMENT (structural or catalytic)	177	1
mc17001090	SUBCELLULAR LOCALIZATION	PROTEIN WITH BINDING FUNCTION OR COFACTOR REQUIREMENT (structural or catalytic)	546	0	SUBCELLULAR LOCALIZATION	493	1
mc2001796	ENERGY;PROTEIN FATE (folding modification destination);PROTEIN WITH BINDING FUNCTION OR COFACTOR REQUIREMENT (structural or catalytic);SUBCELLULAR LOCALIZATION	METABOLISM	542	0	SUBCELLULAR LOCALIZATION	542	1
mc5000250	METABOLISM;PROTEIN WITH BINDING FUNCTION OR COFACTOR REQUIREMENT (structural or catalytic);ORGAN LOCALIZATION	SUBCELLULAR LOCALIZATION	542	0	METABOLISM	437	1
mc4002054	REGULATION OF METABOLISM AND PROTEIN FUNCTION	PROTEIN WITH BINDING FUNCTION OR COFACTOR REQUIREMENT (structural or catalytic)	541	0	REGULATION OF METABOLISM AND PROTEIN FUNCTION	541	1
mc2000391	TRANSCRIPTION;PROTEIN WITH BINDING FUNCTION OR COFACTOR REQUIREMENT (structural or catalytic);REGULATION OF METABOLISM AND PROTEIN FUNCTION;SUBCELLULAR LOCALIZATION	CELL CYCLE AND DNA PROCESSING	537	0	TRANSCRIPTION	537	1
mc2000532	PROTEIN WITH BINDING FUNCTION OR COFACTOR REQUIREMENT (structural or catalytic);CELLULAR TRANSPORT TRANSPORT FACILITIES AND TRANSPORT ROUTES	SUBCELLULAR LOCALIZATION	535	0	PROTEIN WITH BINDING FUNCTION OR COFACTOR REQUIREMENT (structural or catalytic)	481	1
mc11001264	PROTEIN WITH BINDING FUNCTION OR COFACTOR REQUIREMENT (structural or catalytic);INTERACTION WITH THE ENVIRONMENT	SUBCELLULAR LOCALIZATION	531	0	INTERACTION WITH THE ENVIRONMENT	362	1
mc1001044	REGULATION OF METABOLISM AND PROTEIN FUNCTION	PROTEIN WITH BINDING FUNCTION OR COFACTOR REQUIREMENT (structural or catalytic)	528	0	REGULATION OF METABOLISM AND PROTEIN FUNCTION	528	1
mc6001166	PROTEIN FATE (folding modification destination);PROTEIN WITH BINDING FUNCTION OR COFACTOR REQUIREMENT (structural or catalytic);CELL TYPE DIFFERENTIATION	SUBCELLULAR LOCALIZATION	523	0	PROTEIN WITH BINDING FUNCTION OR COFACTOR REQUIREMENT (structural or catalytic)	433	1
mc10000673	SUBCELLULAR LOCALIZATION	CELL FATE	520	0	SUBCELLULAR LOCALIZATION	520	1
mc2000627	CELLULAR TRANSPORT TRANSPORT FACILITIES AND TRANSPORT ROUTES;SUBCELLULAR LOCALIZATION	PROTEIN WITH BINDING FUNCTION OR COFACTOR REQUIREMENT (structural or catalytic)	518	0	SUBCELLULAR LOCALIZATION	416	1
mc11000150	CELLULAR COMMUNICATION/SIGNAL TRANSDUCTION MECHANISM;SUBCELLULAR LOCALIZATION;ORGAN LOCALIZATION	PROTEIN WITH BINDING FUNCTION OR COFACTOR REQUIREMENT (structural or catalytic)	514	0	SUBCELLULAR LOCALIZATION	486	1
mc17001154	CELLULAR COMMUNICATION/SIGNAL TRANSDUCTION MECHANISM	PROTEIN WITH BINDING FUNCTION OR COFACTOR REQUIREMENT (structural or catalytic)	509	0	CELLULAR COMMUNICATION/SIGNAL TRANSDUCTION MECHANISM	444	1
mc19000720	METABOLISM;CELL CYCLE AND DNA PROCESSING;PROTEIN FATE (folding modification destination);PROTEIN WITH BINDING FUNCTION OR COFACTOR REQUIREMENT (structural or catalytic);CELLULAR COMMUNICATION/SIGNAL TRANSDUCTION MECHANISM;CELL FATE	SUBCELLULAR LOCALIZATION	509	0	PROTEIN FATE (folding modification destination)	325	1
mc1002438	PROTEIN WITH BINDING FUNCTION OR COFACTOR REQUIREMENT (structural or catalytic);INTERACTION WITH THE ENVIRONMENT;CELL FATE;SUBCELLULAR LOCALIZATION	PROTEIN FATE (folding modification destination)	508	0	PROTEIN WITH BINDING FUNCTION OR COFACTOR REQUIREMENT (structural or catalytic)	508	1
mc9002180	SUBCELLULAR LOCALIZATION	METABOLISM	507	0	SUBCELLULAR LOCALIZATION	507	1
mc4000185	ENERGY;CELLULAR TRANSPORT TRANSPORT FACILITIES AND TRANSPORT ROUTES	METABOLISM	506	0	ENERGY	506	1
mc18001223	SUBCELLULAR LOCALIZATION	PROTEIN WITH BINDING FUNCTION OR COFACTOR REQUIREMENT (structural or catalytic)	504	0	SUBCELLULAR LOCALIZATION	452	1
mc7000931	ENERGY;CELLULAR TRANSPORT TRANSPORT FACILITIES AND TRANSPORT ROUTES	SUBCELLULAR LOCALIZATION	498	0	ENERGY	497	1
mc1002273	CELLULAR COMMUNICATION/SIGNAL TRANSDUCTION MECHANISM	SUBCELLULAR LOCALIZATION	497	0	CELLULAR COMMUNICATION/SIGNAL TRANSDUCTION MECHANISM	226	1
mc7002209	CELLULAR TRANSPORT TRANSPORT FACILITIES AND TRANSPORT ROUTES	PROTEIN WITH BINDING FUNCTION OR COFACTOR REQUIREMENT (structural or catalytic)	494	0	CELLULAR TRANSPORT TRANSPORT FACILITIES AND TRANSPORT ROUTES	494	1
mc7002599	PROTEIN WITH BINDING FUNCTION OR COFACTOR REQUIREMENT (structural or catalytic);SUBCELLULAR LOCALIZATION	CELL CYCLE AND DNA PROCESSING	491	0	PROTEIN WITH BINDING FUNCTION OR COFACTOR REQUIREMENT (structural or catalytic)	491	1
mc18000357	CELL CYCLE AND DNA PROCESSING;PROTEIN WITH BINDING FUNCTION OR COFACTOR REQUIREMENT (structural or catalytic);CELLULAR TRANSPORT TRANSPORT FACILITIES AND TRANSPORT ROUTES;CELL FATE;DEVELOPMENT (Systemic);SUBCELLULAR LOCALIZATION	SYSTEMIC INTERACTION WITH THE ENVIRONMENT	490	0	PROTEIN WITH BINDING FUNCTION OR COFACTOR REQUIREMENT (structural or catalytic)	439	1
mc13000116	PROTEIN FATE (folding modification destination);PROTEIN WITH BINDING FUNCTION OR COFACTOR REQUIREMENT (structural or catalytic);CELL RESCUE DEFENSE AND VIRULENCE;DEVELOPMENT (Systemic);BIOGENESIS OF CELLULAR COMPONENTS	SUBCELLULAR LOCALIZATION	488	0	PROTEIN WITH BINDING FUNCTION OR COFACTOR REQUIREMENT (structural or catalytic)	444	1
mc17000486	REGULATION OF METABOLISM AND PROTEIN FUNCTION;SUBCELLULAR LOCALIZATION	PROTEIN WITH BINDING FUNCTION OR COFACTOR REQUIREMENT (structural or catalytic)	487	0	REGULATION OF METABOLISM AND PROTEIN FUNCTION	487	1
mcx000458	SUBCELLULAR LOCALIZATION	PROTEIN FATE (folding modification destination)	481	0	SUBCELLULAR LOCALIZATION	481	1
mc6001914	TRANSCRIPTION;PROTEIN WITH BINDING FUNCTION OR COFACTOR REQUIREMENT (structural or catalytic);INTERACTION WITH THE ENVIRONMENT;CELL FATE;DEVELOPMENT (Systemic);CELL TYPE DIFFERENTIATION;TISSUE DIFFERENTIATION;ORGAN DIFFERENTIATION;SUBCELLULAR LOCALIZATION	SYSTEMIC INTERACTION WITH THE ENVIRONMENT	480	0	CELL FATE	480	1
mc8001674	PROTEIN WITH BINDING FUNCTION OR COFACTOR REQUIREMENT (structural or catalytic);CELLULAR TRANSPORT TRANSPORT FACILITIES AND TRANSPORT ROUTES;SUBCELLULAR LOCALIZATION	METABOLISM	480	0	SUBCELLULAR LOCALIZATION	293	1
mc4002366	PROTEIN WITH BINDING FUNCTION OR COFACTOR REQUIREMENT (structural or catalytic);SYSTEMIC INTERACTION WITH THE ENVIRONMENT;CELL TYPE DIFFERENTIATION;SUBCELLULAR LOCALIZATION;CELL TYPE LOCALIZATION	CELLULAR COMMUNICATION/SIGNAL TRANSDUCTION MECHANISM	479	0	SUBCELLULAR LOCALIZATION	373	1
mc4001767	PROTEIN WITH BINDING FUNCTION OR COFACTOR REQUIREMENT (structural or catalytic);SUBCELLULAR LOCALIZATION	TRANSCRIPTION	477	0	SUBCELLULAR LOCALIZATION	477	1
mc1000597	CELL CYCLE AND DNA PROCESSING;CELL RESCUE DEFENSE AND VIRULENCE	PROTEIN WITH BINDING FUNCTION OR COFACTOR REQUIREMENT (structural or catalytic)	474	0	CELL CYCLE AND DNA PROCESSING	401	1
mc12000187	ENERGY;PROTEIN WITH BINDING FUNCTION OR COFACTOR REQUIREMENT (structural or catalytic);CELLULAR TRANSPORT TRANSPORT FACILITIES AND TRANSPORT ROUTES	METABOLISM	473	0	ENERGY	473	1
mcx000615	TRANSCRIPTION;SYSTEMIC INTERACTION WITH THE ENVIRONMENT	SUBCELLULAR LOCALIZATION	473	0	TRANSCRIPTION	456	1
mc2003246	PROTEIN FATE (folding modification destination);CELLULAR TRANSPORT TRANSPORT FACILITIES AND TRANSPORT ROUTES;SUBCELLULAR LOCALIZATION	PROTEIN WITH BINDING FUNCTION OR COFACTOR REQUIREMENT (structural or catalytic)	469	0	CELLULAR TRANSPORT TRANSPORT FACILITIES AND TRANSPORT ROUTES	469	1
mc18001110	PROTEIN WITH BINDING FUNCTION OR COFACTOR REQUIREMENT (structural or catalytic);CELLULAR TRANSPORT TRANSPORT FACILITIES AND TRANSPORT ROUTES;ORGAN LOCALIZATION	METABOLISM	458	0	CELLULAR TRANSPORT TRANSPORT FACILITIES AND TRANSPORT ROUTES	408	1
mc9000125	PROTEIN WITH BINDING FUNCTION OR COFACTOR REQUIREMENT (structural or catalytic);CELLULAR TRANSPORT TRANSPORT FACILITIES AND TRANSPORT ROUTES;CELLULAR COMMUNICATION/SIGNAL TRANSDUCTION MECHANISM	PROTEIN FATE (folding modification destination)	454	0	PROTEIN WITH BINDING FUNCTION OR COFACTOR REQUIREMENT (structural or catalytic)	454	1
mc16001287	TRANSCRIPTION;CELLULAR COMMUNICATION/SIGNAL TRANSDUCTION MECHANISM;CELL RESCUE DEFENSE AND VIRULENCE;SYSTEMIC INTERACTION WITH THE ENVIRONMENT;DEVELOPMENT (Systemic);SUBCELLULAR LOCALIZATION	PROTEIN WITH BINDING FUNCTION OR COFACTOR REQUIREMENT (structural or catalytic)	453	0	CELLULAR COMMUNICATION/SIGNAL TRANSDUCTION MECHANISM	453	1
mc5002123	TRANSCRIPTION;CELL FATE	CELL CYCLE AND DNA PROCESSING	453	0	TRANSCRIPTION	453	1
mc15001011	SUBCELLULAR LOCALIZATION	PROTEIN WITH BINDING FUNCTION OR COFACTOR REQUIREMENT (structural or catalytic)	452	0	SUBCELLULAR LOCALIZATION	452	1
mc19000891	PROTEIN WITH BINDING FUNCTION OR COFACTOR REQUIREMENT (structural or catalytic);INTERACTION WITH THE ENVIRONMENT	SUBCELLULAR LOCALIZATION	452	0	PROTEIN WITH BINDING FUNCTION OR COFACTOR REQUIREMENT (structural or catalytic)	399	1
mc2000271	CELLULAR COMMUNICATION/SIGNAL TRANSDUCTION MECHANISM;SUBCELLULAR LOCALIZATION	PROTEIN WITH BINDING FUNCTION OR COFACTOR REQUIREMENT (structural or catalytic)	450	0	CELLULAR COMMUNICATION/SIGNAL TRANSDUCTION MECHANISM	450	1
mc7002320	METABOLISM;PROTEIN WITH BINDING FUNCTION OR COFACTOR REQUIREMENT (structural or catalytic)	SUBCELLULAR LOCALIZATION	447	0	METABOLISM	350	1
mc11000650	CELLULAR COMMUNICATION/SIGNAL TRANSDUCTION MECHANISM;SUBCELLULAR LOCALIZATION	PROTEIN WITH BINDING FUNCTION OR COFACTOR REQUIREMENT (structural or catalytic)	442	0	CELLULAR COMMUNICATION/SIGNAL TRANSDUCTION MECHANISM	442	1
mc3001439	CELLULAR COMMUNICATION/SIGNAL TRANSDUCTION MECHANISM;SYSTEMIC INTERACTION WITH THE ENVIRONMENT;CELL FATE;DEVELOPMENT (Systemic);ORGAN DIFFERENTIATION;SUBCELLULAR LOCALIZATION	PROTEIN WITH BINDING FUNCTION OR COFACTOR REQUIREMENT (structural or catalytic)	440	0	CELL FATE	440	1
mc9000898	CELL RESCUE DEFENSE AND VIRULENCE;INTERACTION WITH THE ENVIRONMENT;TISSUE DIFFERENTIATION;ORGAN DIFFERENTIATION;SUBCELLULAR LOCALIZATION;TISSUE LOCALIZATION;ORGAN LOCALIZATION	PROTEIN FATE (folding modification destination)	440	0	CELL RESCUE DEFENSE AND VIRULENCE	440	1
mc5000384	PROTEIN WITH BINDING FUNCTION OR COFACTOR REQUIREMENT (structural or catalytic);CELLULAR TRANSPORT TRANSPORT FACILITIES AND TRANSPORT ROUTES;SUBCELLULAR LOCALIZATION	CELLULAR COMMUNICATION/SIGNAL TRANSDUCTION MECHANISM	438	0	CELLULAR TRANSPORT TRANSPORT FACILITIES AND TRANSPORT ROUTES	132	1
mc19000326	SUBCELLULAR LOCALIZATION	CELLULAR COMMUNICATION/SIGNAL TRANSDUCTION MECHANISM	435	0	SUBCELLULAR LOCALIZATION	159	1
mc9001813	PROTEIN WITH BINDING FUNCTION OR COFACTOR REQUIREMENT (structural or catalytic);REGULATION OF METABOLISM AND PROTEIN FUNCTION	PROTEIN FATE (folding modification destination)	428	0	PROTEIN WITH BINDING FUNCTION OR COFACTOR REQUIREMENT (structural or catalytic)	380	1
mc11001678	PROTEIN WITH BINDING FUNCTION OR COFACTOR REQUIREMENT (structural or catalytic)	TRANSCRIPTION	425	0	PROTEIN WITH BINDING FUNCTION OR COFACTOR REQUIREMENT (structural or catalytic)	425	1
mc4001675	ENERGY;CELLULAR TRANSPORT TRANSPORT FACILITIES AND TRANSPORT ROUTES;SUBCELLULAR LOCALIZATION	PROTEIN WITH BINDING FUNCTION OR COFACTOR REQUIREMENT (structural or catalytic)	423	0	ENERGY	297	1
mc14000726	METABOLISM;PROTEIN FATE (folding modification destination)	SUBCELLULAR LOCALIZATION	420	0	METABOLISM	370	1
mc16000585	INTERACTION WITH THE ENVIRONMENT	SUBCELLULAR LOCALIZATION	413	0	INTERACTION WITH THE ENVIRONMENT	223	1
mc15000623	SYSTEMIC INTERACTION WITH THE ENVIRONMENT;SUBCELLULAR LOCALIZATION	CELLULAR COMMUNICATION/SIGNAL TRANSDUCTION MECHANISM	411	0	SYSTEMIC INTERACTION WITH THE ENVIRONMENT	125	1
mc18001043	CELL FATE;SUBCELLULAR LOCALIZATION	PROTEIN WITH BINDING FUNCTION OR COFACTOR REQUIREMENT (structural or catalytic)	409	0	CELL FATE	409	1
mc3001646	METABOLISM;SUBCELLULAR LOCALIZATION	ENERGY	408	0	SUBCELLULAR LOCALIZATION	408	1
mc2003323	PROTEIN WITH BINDING FUNCTION OR COFACTOR REQUIREMENT (structural or catalytic);REGULATION OF METABOLISM AND PROTEIN FUNCTION;CELL FATE	CELL CYCLE AND DNA PROCESSING	406	0	PROTEIN WITH BINDING FUNCTION OR COFACTOR REQUIREMENT (structural or catalytic)	406	1
mc8000325	METABOLISM;PROTEIN FATE (folding modification destination);CELLULAR TRANSPORT TRANSPORT FACILITIES AND TRANSPORT ROUTES;SUBCELLULAR LOCALIZATION	CELLULAR COMMUNICATION/SIGNAL TRANSDUCTION MECHANISM	404	0	SUBCELLULAR LOCALIZATION	349	1
mc1002143	PROTEIN FATE (folding modification destination);CELLULAR COMMUNICATION/SIGNAL TRANSDUCTION MECHANISM;SUBCELLULAR LOCALIZATION	PROTEIN WITH BINDING FUNCTION OR COFACTOR REQUIREMENT (structural or catalytic)	403	0	SUBCELLULAR LOCALIZATION	387	1
mc2003131	METABOLISM;PROTEIN WITH BINDING FUNCTION OR COFACTOR REQUIREMENT (structural or catalytic)	PROTEIN FATE (folding modification destination)	401	0	PROTEIN WITH BINDING FUNCTION OR COFACTOR REQUIREMENT (structural or catalytic)	342	1
mc5001612	CELL CYCLE AND DNA PROCESSING;TRANSCRIPTION;PROTEIN FATE (folding modification destination);SUBCELLULAR LOCALIZATION	PROTEIN WITH BINDING FUNCTION OR COFACTOR REQUIREMENT (structural or catalytic)	395	0	SUBCELLULAR LOCALIZATION	395	1
mc12001023	PROTEIN FATE (folding modification destination);PROTEIN WITH BINDING FUNCTION OR COFACTOR REQUIREMENT (structural or catalytic);SUBCELLULAR LOCALIZATION	TRANSCRIPTION	394	0	PROTEIN WITH BINDING FUNCTION OR COFACTOR REQUIREMENT (structural or catalytic)	394	1
mc3000071	PROTEIN WITH BINDING FUNCTION OR COFACTOR REQUIREMENT (structural or catalytic);CELLULAR COMMUNICATION/SIGNAL TRANSDUCTION MECHANISM;SUBCELLULAR LOCALIZATION	METABOLISM	391	0	PROTEIN WITH BINDING FUNCTION OR COFACTOR REQUIREMENT (structural or catalytic)	391	1
mc7000317	TRANSCRIPTION;PROTEIN WITH BINDING FUNCTION OR COFACTOR REQUIREMENT (structural or catalytic);REGULATION OF METABOLISM AND PROTEIN FUNCTION;SUBCELLULAR LOCALIZATION	PROTEIN FATE (folding modification destination)	384	0	PROTEIN WITH BINDING FUNCTION OR COFACTOR REQUIREMENT (structural or catalytic)	384	1
mc14001396	REGULATION OF METABOLISM AND PROTEIN FUNCTION;CELLULAR COMMUNICATION/SIGNAL TRANSDUCTION MECHANISM	SUBCELLULAR LOCALIZATION	378	0	REGULATION OF METABOLISM AND PROTEIN FUNCTION	326	1
mc9001005	INTERACTION WITH THE ENVIRONMENT;SUBCELLULAR LOCALIZATION	PROTEIN WITH BINDING FUNCTION OR COFACTOR REQUIREMENT (structural or catalytic)	377	0	INTERACTION WITH THE ENVIRONMENT	377	1
mc1001972	SUBCELLULAR LOCALIZATION	PROTEIN WITH BINDING FUNCTION OR COFACTOR REQUIREMENT (structural or catalytic)	371	0	SUBCELLULAR LOCALIZATION	356	1
mc2003029	SUBCELLULAR LOCALIZATION	REGULATION OF METABOLISM AND PROTEIN FUNCTION	368	0	SUBCELLULAR LOCALIZATION	321	1
mc4001292	CELLULAR TRANSPORT TRANSPORT FACILITIES AND TRANSPORT ROUTES	PROTEIN WITH BINDING FUNCTION OR COFACTOR REQUIREMENT (structural or catalytic)	365	0	CELLULAR TRANSPORT TRANSPORT FACILITIES AND TRANSPORT ROUTES	365	1
mc4001944	PROTEIN WITH BINDING FUNCTION OR COFACTOR REQUIREMENT (structural or catalytic);REGULATION OF METABOLISM AND PROTEIN FUNCTION;CELLULAR COMMUNICATION/SIGNAL TRANSDUCTION MECHANISM;SUBCELLULAR LOCALIZATION	METABOLISM	362	0	PROTEIN WITH BINDING FUNCTION OR COFACTOR REQUIREMENT (structural or catalytic)	190	1
mc11000645	METABOLISM;PROTEIN FATE (folding modification destination);PROTEIN WITH BINDING FUNCTION OR COFACTOR REQUIREMENT (structural or catalytic);CELLULAR COMMUNICATION/SIGNAL TRANSDUCTION MECHANISM	SUBCELLULAR LOCALIZATION	358	0	CELLULAR COMMUNICATION/SIGNAL TRANSDUCTION MECHANISM	314	1
mc7002639	SUBCELLULAR LOCALIZATION	PROTEIN WITH BINDING FUNCTION OR COFACTOR REQUIREMENT (structural or catalytic)	358	0	SUBCELLULAR LOCALIZATION	358	1
mc13001818	PROTEIN WITH BINDING FUNCTION OR COFACTOR REQUIREMENT (structural or catalytic);CELL RESCUE DEFENSE AND VIRULENCE;CELL FATE;SUBCELLULAR LOCALIZATION	PROTEIN FATE (folding modification destination)	357	0	PROTEIN WITH BINDING FUNCTION OR COFACTOR REQUIREMENT (structural or catalytic)	357	1
mc1002627	METABOLISM	SUBCELLULAR LOCALIZATION	354	0	METABOLISM	200	1
mc17001102	PROTEIN WITH BINDING FUNCTION OR COFACTOR REQUIREMENT (structural or catalytic);INTERACTION WITH THE ENVIRONMENT;SYSTEMIC INTERACTION WITH THE ENVIRONMENT	SUBCELLULAR LOCALIZATION	354	0	PROTEIN WITH BINDING FUNCTION OR COFACTOR REQUIREMENT (structural or catalytic)	265	1
mc4000687	CELL FATE	SUBCELLULAR LOCALIZATION	353	0	CELL FATE	227	1
mc1001268	PROTEIN WITH BINDING FUNCTION OR COFACTOR REQUIREMENT (structural or catalytic);ORGAN LOCALIZATION	SUBCELLULAR LOCALIZATION	352	0	PROTEIN WITH BINDING FUNCTION OR COFACTOR REQUIREMENT (structural or catalytic)	338	1
mc4000563	REGULATION OF METABOLISM AND PROTEIN FUNCTION;CELL FATE	SUBCELLULAR LOCALIZATION	349	0	CELL FATE	316	1
mc9001280	CELL FATE;SUBCELLULAR LOCALIZATION	CELLULAR TRANSPORT TRANSPORT FACILITIES AND TRANSPORT ROUTES	348	0	CELL FATE	296	1
mc16000567	PROTEIN FATE (folding modification destination);SUBCELLULAR LOCALIZATION	CELLULAR COMMUNICATION/SIGNAL TRANSDUCTION MECHANISM	347	0	PROTEIN FATE (folding modification destination)	145	1
mc15000123	METABOLISM;INTERACTION WITH THE ENVIRONMENT;SYSTEMIC INTERACTION WITH THE ENVIRONMENT	CELLULAR TRANSPORT TRANSPORT FACILITIES AND TRANSPORT ROUTES	343	0	METABOLISM	0	1
mc12000482	CELLULAR TRANSPORT TRANSPORT FACILITIES AND TRANSPORT ROUTES;SUBCELLULAR LOCALIZATION	PROTEIN WITH BINDING FUNCTION OR COFACTOR REQUIREMENT (structural or catalytic)	337	0	CELLULAR TRANSPORT TRANSPORT FACILITIES AND TRANSPORT ROUTES	337	1
mc19000664	PROTEIN WITH BINDING FUNCTION OR COFACTOR REQUIREMENT (structural or catalytic);CELLULAR COMMUNICATION/SIGNAL TRANSDUCTION MECHANISM	SUBCELLULAR LOCALIZATION	328	0	CELLULAR COMMUNICATION/SIGNAL TRANSDUCTION MECHANISM	158	1
mc11001895	PROTEIN WITH BINDING FUNCTION OR COFACTOR REQUIREMENT (structural or catalytic);SYSTEMIC INTERACTION WITH THE ENVIRONMENT;BIOGENESIS OF CELLULAR COMPONENTS;TISSUE DIFFERENTIATION;SUBCELLULAR LOCALIZATION;TISSUE LOCALIZATION	INTERACTION WITH THE ENVIRONMENT	325	0	SYSTEMIC INTERACTION WITH THE ENVIRONMENT	325	1
mc8001962	CELL FATE;TISSUE DIFFERENTIATION	SYSTEMIC INTERACTION WITH THE ENVIRONMENT	318	0	CELL FATE	318	1
mc7002319	METABOLISM;CELL CYCLE AND DNA PROCESSING;SUBCELLULAR LOCALIZATION	PROTEIN WITH BINDING FUNCTION OR COFACTOR REQUIREMENT (structural or catalytic)	317	0	METABOLISM	274	1
mc5002350	SUBCELLULAR LOCALIZATION	CELLULAR TRANSPORT TRANSPORT FACILITIES AND TRANSPORT ROUTES	315	0	SUBCELLULAR LOCALIZATION	143	1
mc15000757	PROTEIN FATE (folding modification destination);ORGAN DIFFERENTIATION;ORGAN LOCALIZATION	METABOLISM	314	0	PROTEIN FATE (folding modification destination)	314	1
mc19000082	CELLULAR COMMUNICATION/SIGNAL TRANSDUCTION MECHANISM;CELL FATE;SUBCELLULAR LOCALIZATION	PROTEIN WITH BINDING FUNCTION OR COFACTOR REQUIREMENT (structural or catalytic)	313	0	CELL FATE	313	1
mcx000716	PROTEIN FATE (folding modification destination)	SUBCELLULAR LOCALIZATION	310	0	PROTEIN FATE (folding modification destination)	254	1
mc18001241	PROTEIN WITH BINDING FUNCTION OR COFACTOR REQUIREMENT (structural or catalytic)	TRANSCRIPTION	309	0	PROTEIN WITH BINDING FUNCTION OR COFACTOR REQUIREMENT (structural or catalytic)	309	1
mc14000173	PROTEIN WITH BINDING FUNCTION OR COFACTOR REQUIREMENT (structural or catalytic);INTERACTION WITH THE ENVIRONMENT;SUBCELLULAR LOCALIZATION	METABOLISM	308	0	PROTEIN WITH BINDING FUNCTION OR COFACTOR REQUIREMENT (structural or catalytic)	308	1
mc2001262	PROTEIN WITH BINDING FUNCTION OR COFACTOR REQUIREMENT (structural or catalytic)	SUBCELLULAR LOCALIZATION	306	0	PROTEIN WITH BINDING FUNCTION OR COFACTOR REQUIREMENT (structural or catalytic)	258	1
mc9000276	SUBCELLULAR LOCALIZATION	METABOLISM	306	0	SUBCELLULAR LOCALIZATION	306	1
mc11001565	CELLULAR TRANSPORT TRANSPORT FACILITIES AND TRANSPORT ROUTES	SUBCELLULAR LOCALIZATION	300	0	CELLULAR TRANSPORT TRANSPORT FACILITIES AND TRANSPORT ROUTES	105	1
mc6000021	INTERACTION WITH THE ENVIRONMENT;SYSTEMIC INTERACTION WITH THE ENVIRONMENT;TISSUE DIFFERENTIATION;SUBCELLULAR LOCALIZATION	PROTEIN WITH BINDING FUNCTION OR COFACTOR REQUIREMENT (structural or catalytic)	298	0	SYSTEMIC INTERACTION WITH THE ENVIRONMENT	298	1
mc19000293	CELL CYCLE AND DNA PROCESSING;PROTEIN WITH BINDING FUNCTION OR COFACTOR REQUIREMENT (structural or catalytic);CELL RESCUE DEFENSE AND VIRULENCE;SUBCELLULAR LOCALIZATION	TRANSCRIPTION	297	0	SUBCELLULAR LOCALIZATION	297	1
mc7000366	PROTEIN FATE (folding modification destination);PROTEIN WITH BINDING FUNCTION OR COFACTOR REQUIREMENT (structural or catalytic);CELLULAR TRANSPORT TRANSPORT FACILITIES AND TRANSPORT ROUTES;SUBCELLULAR LOCALIZATION	CELLULAR COMMUNICATION/SIGNAL TRANSDUCTION MECHANISM	292	0	SUBCELLULAR LOCALIZATION	292	1
mc17001616	PROTEIN WITH BINDING FUNCTION OR COFACTOR REQUIREMENT (structural or catalytic);CELL FATE;SUBCELLULAR LOCALIZATION	CELLULAR COMMUNICATION/SIGNAL TRANSDUCTION MECHANISM	291	0	CELL FATE	291	1
mc11002621	SUBCELLULAR LOCALIZATION	SYSTEMIC INTERACTION WITH THE ENVIRONMENT	290	0	SUBCELLULAR LOCALIZATION	287	1
mc12000964	PROTEIN WITH BINDING FUNCTION OR COFACTOR REQUIREMENT (structural or catalytic)	METABOLISM	289	0	PROTEIN WITH BINDING FUNCTION OR COFACTOR REQUIREMENT (structural or catalytic)	289	1
mc3000280	CELL FATE;SUBCELLULAR LOCALIZATION	PROTEIN WITH BINDING FUNCTION OR COFACTOR REQUIREMENT (structural or catalytic)	288	0	SUBCELLULAR LOCALIZATION	239	1
mc14001088	CELL CYCLE AND DNA PROCESSING;PROTEIN FATE (folding modification destination);PROTEIN WITH BINDING FUNCTION OR COFACTOR REQUIREMENT (structural or catalytic);CELLULAR TRANSPORT TRANSPORT FACILITIES AND TRANSPORT ROUTES;CELL FATE;BIOGENESIS OF CELLULAR COMPONENTS;SUBCELLULAR LOCALIZATION	CELLULAR COMMUNICATION/SIGNAL TRANSDUCTION MECHANISM	281	0	CELL CYCLE AND DNA PROCESSING	235	1
mc8001442	PROTEIN WITH BINDING FUNCTION OR COFACTOR REQUIREMENT (structural or catalytic);CELLULAR COMMUNICATION/SIGNAL TRANSDUCTION MECHANISM	SUBCELLULAR LOCALIZATION	281	0	PROTEIN WITH BINDING FUNCTION OR COFACTOR REQUIREMENT (structural or catalytic)	254	1
mc2002459	PROTEIN WITH BINDING FUNCTION OR COFACTOR REQUIREMENT (structural or catalytic);DEVELOPMENT (Systemic)	PROTEIN FATE (folding modification destination)	279	0	PROTEIN WITH BINDING FUNCTION OR COFACTOR REQUIREMENT (structural or catalytic)	279	1
mc8001746	TRANSCRIPTION;PROTEIN FATE (folding modification destination);SUBCELLULAR LOCALIZATION	PROTEIN WITH BINDING FUNCTION OR COFACTOR REQUIREMENT (structural or catalytic)	279	0	SUBCELLULAR LOCALIZATION	279	1
mc19000526	PROTEIN WITH BINDING FUNCTION OR COFACTOR REQUIREMENT (structural or catalytic)	CELLULAR COMMUNICATION/SIGNAL TRANSDUCTION MECHANISM	275	0	PROTEIN WITH BINDING FUNCTION OR COFACTOR REQUIREMENT (structural or catalytic)	231	1
mc2003274	PROTEIN FATE (folding modification destination)	METABOLISM	274	0	PROTEIN FATE (folding modification destination)	274	1
mc5001270	METABOLISM;PROTEIN WITH BINDING FUNCTION OR COFACTOR REQUIREMENT (structural or catalytic);SUBCELLULAR LOCALIZATION	PROTEIN FATE (folding modification destination)	270	0	SUBCELLULAR LOCALIZATION	270	1
mc5001792	PROTEIN WITH BINDING FUNCTION OR COFACTOR REQUIREMENT (structural or catalytic);CELLULAR TRANSPORT TRANSPORT FACILITIES AND TRANSPORT ROUTES;SUBCELLULAR LOCALIZATION	TRANSCRIPTION	270	0	PROTEIN WITH BINDING FUNCTION OR COFACTOR REQUIREMENT (structural or catalytic)	270	1
mc12001084	CELLULAR COMMUNICATION/SIGNAL TRANSDUCTION MECHANISM;SUBCELLULAR LOCALIZATION	PROTEIN WITH BINDING FUNCTION OR COFACTOR REQUIREMENT (structural or catalytic)	267	0	SUBCELLULAR LOCALIZATION	53	1
mc9001792	PROTEIN FATE (folding modification destination)	PROTEIN WITH BINDING FUNCTION OR COFACTOR REQUIREMENT (structural or catalytic)	265	0	PROTEIN FATE (folding modification destination)	210	1
mc18000968	PROTEIN FATE (folding modification destination)	REGULATION OF METABOLISM AND PROTEIN FUNCTION	264	0	PROTEIN FATE (folding modification destination)	232	1
mc10000734	PROTEIN WITH BINDING FUNCTION OR COFACTOR REQUIREMENT (structural or catalytic);CELL FATE;SUBCELLULAR LOCALIZATION	SYSTEMIC INTERACTION WITH THE ENVIRONMENT	262	0	SUBCELLULAR LOCALIZATION	262	1
mc7002936	PROTEIN WITH BINDING FUNCTION OR COFACTOR REQUIREMENT (structural or catalytic);CELLULAR COMMUNICATION/SIGNAL TRANSDUCTION MECHANISM;CELL FATE	SUBCELLULAR LOCALIZATION	259	0	PROTEIN WITH BINDING FUNCTION OR COFACTOR REQUIREMENT (structural or catalytic)	228	1
mc1001786	ENERGY;CELLULAR TRANSPORT TRANSPORT FACILITIES AND TRANSPORT ROUTES	METABOLISM	256	0	ENERGY	256	1
mc17000377	PROTEIN WITH BINDING FUNCTION OR COFACTOR REQUIREMENT (structural or catalytic)	METABOLISM	254	0	PROTEIN WITH BINDING FUNCTION OR COFACTOR REQUIREMENT (structural or catalytic)	254	1
mc11002237	REGULATION OF METABOLISM AND PROTEIN FUNCTION;CELLULAR COMMUNICATION/SIGNAL TRANSDUCTION MECHANISM	PROTEIN WITH BINDING FUNCTION OR COFACTOR REQUIREMENT (structural or catalytic)	250	0	CELLULAR COMMUNICATION/SIGNAL TRANSDUCTION MECHANISM	205	1
mc14000860	PROTEIN FATE (folding modification destination);PROTEIN WITH BINDING FUNCTION OR COFACTOR REQUIREMENT (structural or catalytic);CELLULAR COMMUNICATION/SIGNAL TRANSDUCTION MECHANISM;CELL FATE;DEVELOPMENT (Systemic);ORGAN DIFFERENTIATION	SUBCELLULAR LOCALIZATION	250	0	PROTEIN FATE (folding modification destination)	196	1
mc10001169	CELLULAR TRANSPORT TRANSPORT FACILITIES AND TRANSPORT ROUTES;SUBCELLULAR LOCALIZATION	PROTEIN WITH BINDING FUNCTION OR COFACTOR REQUIREMENT (structural or catalytic)	249	0	CELLULAR TRANSPORT TRANSPORT FACILITIES AND TRANSPORT ROUTES	249	1
mcx000699	TRANSCRIPTION;PROTEIN WITH BINDING FUNCTION OR COFACTOR REQUIREMENT (structural or catalytic);DEVELOPMENT (Systemic);SUBCELLULAR LOCALIZATION	CELL CYCLE AND DNA PROCESSING	248	0	PROTEIN WITH BINDING FUNCTION OR COFACTOR REQUIREMENT (structural or catalytic)	248	1
mc6002126	SUBCELLULAR LOCALIZATION	PROTEIN FATE (folding modification destination)	244	0	SUBCELLULAR LOCALIZATION	244	1
mc10001023	PROTEIN WITH BINDING FUNCTION OR COFACTOR REQUIREMENT (structural or catalytic)	SUBCELLULAR LOCALIZATION	243	0	PROTEIN WITH BINDING FUNCTION OR COFACTOR REQUIREMENT (structural or catalytic)	201	1
mc14000258	METABOLISM	SUBCELLULAR LOCALIZATION	241	0	METABOLISM	237	1
mc17001283	CELL FATE;SUBCELLULAR LOCALIZATION	PROTEIN WITH BINDING FUNCTION OR COFACTOR REQUIREMENT (structural or catalytic)	239	0	CELL FATE	239	1
mc8001614	PROTEIN WITH BINDING FUNCTION OR COFACTOR REQUIREMENT (structural or catalytic)	ENERGY	236	0	PROTEIN WITH BINDING FUNCTION OR COFACTOR REQUIREMENT (structural or catalytic)	236	1
mc16001073	PROTEIN WITH BINDING FUNCTION OR COFACTOR REQUIREMENT (structural or catalytic);SUBCELLULAR LOCALIZATION	CELL CYCLE AND DNA PROCESSING	231	0	PROTEIN WITH BINDING FUNCTION OR COFACTOR REQUIREMENT (structural or catalytic)	140	1
mc11001740	METABOLISM;CELL CYCLE AND DNA PROCESSING;TRANSCRIPTION;PROTEIN WITH BINDING FUNCTION OR COFACTOR REQUIREMENT (structural or catalytic);CELL RESCUE DEFENSE AND VIRULENCE;SUBCELLULAR LOCALIZATION	CELL FATE	230	0	CELL CYCLE AND DNA PROCESSING	117	1
mc13000883	CELL CYCLE AND DNA PROCESSING;PROTEIN WITH BINDING FUNCTION OR COFACTOR REQUIREMENT (structural or catalytic);DEVELOPMENT (Systemic);BIOGENESIS OF CELLULAR COMPONENTS;ORGAN LOCALIZATION	PROTEIN FATE (folding modification destination)	229	0	PROTEIN WITH BINDING FUNCTION OR COFACTOR REQUIREMENT (structural or catalytic)	229	1
mc15000806	SUBCELLULAR LOCALIZATION	CELL RESCUE DEFENSE AND VIRULENCE	225	0	SUBCELLULAR LOCALIZATION	225	1
mc4000400	REGULATION OF METABOLISM AND PROTEIN FUNCTION;SUBCELLULAR LOCALIZATION	PROTEIN FATE (folding modification destination)	222	0	REGULATION OF METABOLISM AND PROTEIN FUNCTION	175	1
mc1001864	ENERGY;REGULATION OF METABOLISM AND PROTEIN FUNCTION;CELLULAR TRANSPORT TRANSPORT FACILITIES AND TRANSPORT ROUTES;CELLULAR COMMUNICATION/SIGNAL TRANSDUCTION MECHANISM;INTERACTION WITH THE ENVIRONMENT;SYSTEMIC INTERACTION WITH THE ENVIRONMENT;SUBCELLULAR LOCALIZATION	PROTEIN WITH BINDING FUNCTION OR COFACTOR REQUIREMENT (structural or catalytic)	219	0	REGULATION OF METABOLISM AND PROTEIN FUNCTION	219	1
mc11001106	PROTEIN WITH BINDING FUNCTION OR COFACTOR REQUIREMENT (structural or catalytic);INTERACTION WITH THE ENVIRONMENT;ORGAN DIFFERENTIATION;SUBCELLULAR LOCALIZATION;CELL TYPE LOCALIZATION;TISSUE LOCALIZATION;ORGAN LOCALIZATION	CELL FATE	218	0	PROTEIN WITH BINDING FUNCTION OR COFACTOR REQUIREMENT (structural or catalytic)	217	1
mc5001159	SUBCELLULAR LOCALIZATION	METABOLISM	214	0	SUBCELLULAR LOCALIZATION	214	1
mc16000616	PROTEIN FATE (folding modification destination);PROTEIN WITH BINDING FUNCTION OR COFACTOR REQUIREMENT (structural or catalytic);TISSUE LOCALIZATION	METABOLISM	213	0	PROTEIN FATE (folding modification destination)	42	1
mc6000037	ENERGY;PROTEIN FATE (folding modification destination);PROTEIN WITH BINDING FUNCTION OR COFACTOR REQUIREMENT (structural or catalytic);INTERACTION WITH THE ENVIRONMENT;BIOGENESIS OF CELLULAR COMPONENTS;SUBCELLULAR LOCALIZATION	CELLULAR TRANSPORT TRANSPORT FACILITIES AND TRANSPORT ROUTES	212	0	SUBCELLULAR LOCALIZATION	200	1
mc3000549	SUBCELLULAR LOCALIZATION	PROTEIN WITH BINDING FUNCTION OR COFACTOR REQUIREMENT (structural or catalytic)	211	0	SUBCELLULAR LOCALIZATION	211	1
mc11001927	SUBCELLULAR LOCALIZATION	PROTEIN WITH BINDING FUNCTION OR COFACTOR REQUIREMENT (structural or catalytic)	209	0	SUBCELLULAR LOCALIZATION	209	1
mc7002201	PROTEIN FATE (folding modification destination);PROTEIN WITH BINDING FUNCTION OR COFACTOR REQUIREMENT (structural or catalytic);SUBCELLULAR LOCALIZATION	METABOLISM	209	0	PROTEIN WITH BINDING FUNCTION OR COFACTOR REQUIREMENT (structural or catalytic)	209	1
mc1000567	PROTEIN WITH BINDING FUNCTION OR COFACTOR REQUIREMENT (structural or catalytic);BIOGENESIS OF CELLULAR COMPONENTS;SUBCELLULAR LOCALIZATION	TRANSCRIPTION	207	0	SUBCELLULAR LOCALIZATION	207	1
mc5002216	ENERGY;PROTEIN WITH BINDING FUNCTION OR COFACTOR REQUIREMENT (structural or catalytic);CELLULAR TRANSPORT TRANSPORT FACILITIES AND TRANSPORT ROUTES;CELLULAR COMMUNICATION/SIGNAL TRANSDUCTION MECHANISM;SUBCELLULAR LOCALIZATION	BIOGENESIS OF CELLULAR COMPONENTS	205	0	PROTEIN WITH BINDING FUNCTION OR COFACTOR REQUIREMENT (structural or catalytic)	193	1
mc6000428	PROTEIN FATE (folding modification destination);PROTEIN WITH BINDING FUNCTION OR COFACTOR REQUIREMENT (structural or catalytic);SUBCELLULAR LOCALIZATION	INTERACTION WITH THE ENVIRONMENT	204	0	PROTEIN FATE (folding modification destination)	196	1
mc10001521	METABOLISM;PROTEIN WITH BINDING FUNCTION OR COFACTOR REQUIREMENT (structural or catalytic);CELLULAR COMMUNICATION/SIGNAL TRANSDUCTION MECHANISM	PROTEIN FATE (folding modification destination)	203	0	PROTEIN WITH BINDING FUNCTION OR COFACTOR REQUIREMENT (structural or catalytic)	203	1
mc1001991	ORGAN DIFFERENTIATION;SUBCELLULAR LOCALIZATION;ORGAN LOCALIZATION	CELL FATE	199	0	ORGAN DIFFERENTIATION	199	1
mc17001099	TRANSCRIPTION;PROTEIN SYNTHESIS;PROTEIN WITH BINDING FUNCTION OR COFACTOR REQUIREMENT (structural or catalytic);SUBCELLULAR LOCALIZATION	CELL CYCLE AND DNA PROCESSING	199	0	PROTEIN SYNTHESIS	199	1
mc5001009	CELL CYCLE AND DNA PROCESSING;PROTEIN SYNTHESIS;PROTEIN FATE (folding modification destination);PROTEIN WITH BINDING FUNCTION OR COFACTOR REQUIREMENT (structural or catalytic);REGULATION OF METABOLISM AND PROTEIN FUNCTION;CELL RESCUE DEFENSE AND VIRULENCE;INTERACTION WITH THE ENVIRONMENT;SYSTEMIC INTERACTION WITH THE ENVIRONMENT;CELL FATE;BIOGENESIS OF CELLULAR COMPONENTS;SUBCELLULAR LOCALIZATION	TRANSCRIPTION	199	0	PROTEIN SYNTHESIS	199	1
mc7001451	METABOLISM;PROTEIN WITH BINDING FUNCTION OR COFACTOR REQUIREMENT (structural or catalytic)	CELLULAR TRANSPORT TRANSPORT FACILITIES AND TRANSPORT ROUTES	198	0	PROTEIN WITH BINDING FUNCTION OR COFACTOR REQUIREMENT (structural or catalytic)	102	1
mc9002035	CELLULAR TRANSPORT TRANSPORT FACILITIES AND TRANSPORT ROUTES;CELLULAR COMMUNICATION/SIGNAL TRANSDUCTION MECHANISM;CELL FATE;SUBCELLULAR LOCALIZATION	PROTEIN WITH BINDING FUNCTION OR COFACTOR REQUIREMENT (structural or catalytic)	197	0	CELLULAR COMMUNICATION/SIGNAL TRANSDUCTION MECHANISM	197	1
mc1001660	PROTEIN FATE (folding modification destination);PROTEIN WITH BINDING FUNCTION OR COFACTOR REQUIREMENT (structural or catalytic);SUBCELLULAR LOCALIZATION	CELL CYCLE AND DNA PROCESSING	196	0	PROTEIN FATE (folding modification destination)	196	1
mc15001026	PROTEIN WITH BINDING FUNCTION OR COFACTOR REQUIREMENT (structural or catalytic);REGULATION OF METABOLISM AND PROTEIN FUNCTION;CELLULAR COMMUNICATION/SIGNAL TRANSDUCTION MECHANISM	METABOLISM	195	0	PROTEIN WITH BINDING FUNCTION OR COFACTOR REQUIREMENT (structural or catalytic)	195	1
mc5002089	SUBCELLULAR LOCALIZATION	PROTEIN WITH BINDING FUNCTION OR COFACTOR REQUIREMENT (structural or catalytic)	195	0	SUBCELLULAR LOCALIZATION	195	1
mc17000908	PROTEIN FATE (folding modification destination)	SUBCELLULAR LOCALIZATION	194	0	PROTEIN FATE (folding modification destination)	150	1
mc2000224	CELL RESCUE DEFENSE AND VIRULENCE;SUBCELLULAR LOCALIZATION	PROTEIN WITH BINDING FUNCTION OR COFACTOR REQUIREMENT (structural or catalytic)	193	0	CELL RESCUE DEFENSE AND VIRULENCE	193	1
mc3001773	PROTEIN FATE (folding modification destination);PROTEIN WITH BINDING FUNCTION OR COFACTOR REQUIREMENT (structural or catalytic)	METABOLISM	192	0	PROTEIN FATE (folding modification destination)	192	1
mc8000732	PROTEIN FATE (folding modification destination);PROTEIN WITH BINDING FUNCTION OR COFACTOR REQUIREMENT (structural or catalytic);BIOGENESIS OF CELLULAR COMPONENTS;SUBCELLULAR LOCALIZATION	METABOLISM	192	0	PROTEIN FATE (folding modification destination)	192	1
mc9000174	TRANSCRIPTION;SUBCELLULAR LOCALIZATION	CELL CYCLE AND DNA PROCESSING	190	0	TRANSCRIPTION	190	1
mc7002224	PROTEIN WITH BINDING FUNCTION OR COFACTOR REQUIREMENT (structural or catalytic);CELLULAR TRANSPORT TRANSPORT FACILITIES AND TRANSPORT ROUTES;BIOGENESIS OF CELLULAR COMPONENTS;SUBCELLULAR LOCALIZATION	PROTEIN FATE (folding modification destination)	187	0	CELLULAR TRANSPORT TRANSPORT FACILITIES AND TRANSPORT ROUTES	187	1
mc8000395	TRANSCRIPTION;PROTEIN WITH BINDING FUNCTION OR COFACTOR REQUIREMENT (structural or catalytic)	SUBCELLULAR LOCALIZATION	186	0	PROTEIN WITH BINDING FUNCTION OR COFACTOR REQUIREMENT (structural or catalytic)	138	1
mc9000716	PROTEIN WITH BINDING FUNCTION OR COFACTOR REQUIREMENT (structural or catalytic);SUBCELLULAR LOCALIZATION	PROTEIN FATE (folding modification destination)	186	0	PROTEIN WITH BINDING FUNCTION OR COFACTOR REQUIREMENT (structural or catalytic)	186	1
mc15000977	PROTEIN WITH BINDING FUNCTION OR COFACTOR REQUIREMENT (structural or catalytic);SUBCELLULAR LOCALIZATION	REGULATION OF METABOLISM AND PROTEIN FUNCTION	185	0	SUBCELLULAR LOCALIZATION	44	1
mc6001687	METABOLISM;CELL CYCLE AND DNA PROCESSING;PROTEIN WITH BINDING FUNCTION OR COFACTOR REQUIREMENT (structural or catalytic);CELL RESCUE DEFENSE AND VIRULENCE;CELL FATE;SUBCELLULAR LOCALIZATION	TRANSCRIPTION	179	0	PROTEIN WITH BINDING FUNCTION OR COFACTOR REQUIREMENT (structural or catalytic)	179	1
mc11001207	PROTEIN WITH BINDING FUNCTION OR COFACTOR REQUIREMENT (structural or catalytic);CELLULAR TRANSPORT TRANSPORT FACILITIES AND TRANSPORT ROUTES;CELL FATE;SUBCELLULAR LOCALIZATION;CELL TYPE LOCALIZATION;ORGAN LOCALIZATION	CELL CYCLE AND DNA PROCESSING	178	0	PROTEIN WITH BINDING FUNCTION OR COFACTOR REQUIREMENT (structural or catalytic)	178	1
mc19001156	METABOLISM	TRANSCRIPTION	174	0	METABOLISM	106	1
mc14000351	PROTEIN WITH BINDING FUNCTION OR COFACTOR REQUIREMENT (structural or catalytic);SUBCELLULAR LOCALIZATION	PROTEIN SYNTHESIS	173	0	PROTEIN WITH BINDING FUNCTION OR COFACTOR REQUIREMENT (structural or catalytic)	173	1
mc2000175	SUBCELLULAR LOCALIZATION	PROTEIN SYNTHESIS	173	0	SUBCELLULAR LOCALIZATION	173	1
mc19000975	TRANSCRIPTION;PROTEIN FATE (folding modification destination);PROTEIN WITH BINDING FUNCTION OR COFACTOR REQUIREMENT (structural or catalytic);CELL RESCUE DEFENSE AND VIRULENCE;SUBCELLULAR LOCALIZATION	CELL CYCLE AND DNA PROCESSING	170	0	PROTEIN WITH BINDING FUNCTION OR COFACTOR REQUIREMENT (structural or catalytic)	170	1
mcx000346	METABOLISM	SUBCELLULAR LOCALIZATION	168	0	METABOLISM	114	1
mc18000919	BIOGENESIS OF CELLULAR COMPONENTS;SUBCELLULAR LOCALIZATION	PROTEIN WITH BINDING FUNCTION OR COFACTOR REQUIREMENT (structural or catalytic)	166	0	SUBCELLULAR LOCALIZATION	166	1
mc6000924	PROTEIN WITH BINDING FUNCTION OR COFACTOR REQUIREMENT (structural or catalytic);SUBCELLULAR LOCALIZATION	METABOLISM	166	0	PROTEIN WITH BINDING FUNCTION OR COFACTOR REQUIREMENT (structural or catalytic)	166	1
mc16000146	ENERGY;CELLULAR TRANSPORT TRANSPORT FACILITIES AND TRANSPORT ROUTES;SUBCELLULAR LOCALIZATION	PROTEIN FATE (folding modification destination)	163	0	SUBCELLULAR LOCALIZATION	163	1
mc8001766	METABOLISM	SUBCELLULAR LOCALIZATION	163	0	METABOLISM	142	1
mc7002172	PROTEIN WITH BINDING FUNCTION OR COFACTOR REQUIREMENT (structural or catalytic);SUBCELLULAR LOCALIZATION	PROTEIN FATE (folding modification destination)	161	0	PROTEIN WITH BINDING FUNCTION OR COFACTOR REQUIREMENT (structural or catalytic)	142	1
mc1001603	SYSTEMIC INTERACTION WITH THE ENVIRONMENT;CELL FATE;SUBCELLULAR LOCALIZATION	CELLULAR COMMUNICATION/SIGNAL TRANSDUCTION MECHANISM	160	0	SYSTEMIC INTERACTION WITH THE ENVIRONMENT	160	1
mc16000124	PROTEIN WITH BINDING FUNCTION OR COFACTOR REQUIREMENT (structural or catalytic);REGULATION OF METABOLISM AND PROTEIN FUNCTION;SUBCELLULAR LOCALIZATION;TISSUE LOCALIZATION;ORGAN LOCALIZATION	CELL FATE	160	0	PROTEIN WITH BINDING FUNCTION OR COFACTOR REQUIREMENT (structural or catalytic)	137	1
mc17000407	CELLULAR COMMUNICATION/SIGNAL TRANSDUCTION MECHANISM	PROTEIN FATE (folding modification destination)	158	0	CELLULAR COMMUNICATION/SIGNAL TRANSDUCTION MECHANISM	116	1
mc13001238	METABOLISM;ENERGY;CELLULAR TRANSPORT TRANSPORT FACILITIES AND TRANSPORT ROUTES;CELL RESCUE DEFENSE AND VIRULENCE;INTERACTION WITH THE ENVIRONMENT	SUBCELLULAR LOCALIZATION	155	0	ENERGY	106	1
mc4000069	PROTEIN WITH BINDING FUNCTION OR COFACTOR REQUIREMENT (structural or catalytic);SUBCELLULAR LOCALIZATION;TISSUE LOCALIZATION	PROTEIN FATE (folding modification destination)	155	0	SUBCELLULAR LOCALIZATION	155	1
mc8001681	PROTEIN FATE (folding modification destination);PROTEIN WITH BINDING FUNCTION OR COFACTOR REQUIREMENT (structural or catalytic);REGULATION OF METABOLISM AND PROTEIN FUNCTION;CELL RESCUE DEFENSE AND VIRULENCE;SUBCELLULAR LOCALIZATION	PROTEIN SYNTHESIS	152	0	PROTEIN FATE (folding modification destination)	147	1
mc4001991	CELLULAR COMMUNICATION/SIGNAL TRANSDUCTION MECHANISM	PROTEIN WITH BINDING FUNCTION OR COFACTOR REQUIREMENT (structural or catalytic)	149	0	CELLULAR COMMUNICATION/SIGNAL TRANSDUCTION MECHANISM	149	1
mc14001111	CELL CYCLE AND DNA PROCESSING;PROTEIN WITH BINDING FUNCTION OR COFACTOR REQUIREMENT (structural or catalytic);SUBCELLULAR LOCALIZATION	TRANSCRIPTION	148	0	PROTEIN WITH BINDING FUNCTION OR COFACTOR REQUIREMENT (structural or catalytic)	148	1
mc2002279	SUBCELLULAR LOCALIZATION	METABOLISM	148	0	SUBCELLULAR LOCALIZATION	148	1
mc14000381	ENERGY;CELLULAR TRANSPORT TRANSPORT FACILITIES AND TRANSPORT ROUTES	PROTEIN WITH BINDING FUNCTION OR COFACTOR REQUIREMENT (structural or catalytic)	146	0	CELLULAR TRANSPORT TRANSPORT FACILITIES AND TRANSPORT ROUTES	146	1
mc14000864	PROTEIN WITH BINDING FUNCTION OR COFACTOR REQUIREMENT (structural or catalytic);CELLULAR TRANSPORT TRANSPORT FACILITIES AND TRANSPORT ROUTES;SUBCELLULAR LOCALIZATION	PROTEIN FATE (folding modification destination)	146	0	PROTEIN WITH BINDING FUNCTION OR COFACTOR REQUIREMENT (structural or catalytic)	146	1
mc14000988	PROTEIN WITH BINDING FUNCTION OR COFACTOR REQUIREMENT (structural or catalytic)	TRANSCRIPTION	146	0	PROTEIN WITH BINDING FUNCTION OR COFACTOR REQUIREMENT (structural or catalytic)	146	1
mc15000820	CELL RESCUE DEFENSE AND VIRULENCE;CELL TYPE DIFFERENTIATION;CELL TYPE LOCALIZATION	SUBCELLULAR LOCALIZATION	146	0	CELL RESCUE DEFENSE AND VIRULENCE	86	1
mc16001263	CELLULAR COMMUNICATION/SIGNAL TRANSDUCTION MECHANISM;SUBCELLULAR LOCALIZATION	PROTEIN WITH BINDING FUNCTION OR COFACTOR REQUIREMENT (structural or catalytic)	146	0	CELLULAR COMMUNICATION/SIGNAL TRANSDUCTION MECHANISM	146	1
mc14001015	CELL RESCUE DEFENSE AND VIRULENCE;SUBCELLULAR LOCALIZATION	METABOLISM	145	0	SUBCELLULAR LOCALIZATION	130	1
mc1002145	TRANSCRIPTION;PROTEIN WITH BINDING FUNCTION OR COFACTOR REQUIREMENT (structural or catalytic);REGULATION OF METABOLISM AND PROTEIN FUNCTION;CELL FATE;CELL TYPE DIFFERENTIATION;SUBCELLULAR LOCALIZATION	PROTEIN SYNTHESIS	144	0	PROTEIN WITH BINDING FUNCTION OR COFACTOR REQUIREMENT (structural or catalytic)	144	1
mc19000086	SUBCELLULAR LOCALIZATION	PROTEIN WITH BINDING FUNCTION OR COFACTOR REQUIREMENT (structural or catalytic)	144	0	SUBCELLULAR LOCALIZATION	144	1
mc1000423	PROTEIN SYNTHESIS;PROTEIN WITH BINDING FUNCTION OR COFACTOR REQUIREMENT (structural or catalytic);SUBCELLULAR LOCALIZATION	TRANSCRIPTION	143	0	PROTEIN WITH BINDING FUNCTION OR COFACTOR REQUIREMENT (structural or catalytic)	143	1
mc19000288	PROTEIN WITH BINDING FUNCTION OR COFACTOR REQUIREMENT (structural or catalytic)	TRANSCRIPTION	143	0	PROTEIN WITH BINDING FUNCTION OR COFACTOR REQUIREMENT (structural or catalytic)	143	1
mc19000020	SUBCELLULAR LOCALIZATION	PROTEIN WITH BINDING FUNCTION OR COFACTOR REQUIREMENT (structural or catalytic)	142	0	SUBCELLULAR LOCALIZATION	142	1
mc2001819	SUBCELLULAR LOCALIZATION	SYSTEMIC INTERACTION WITH THE ENVIRONMENT	142	0	SUBCELLULAR LOCALIZATION	142	1
mc4000599	TRANSCRIPTION;SUBCELLULAR LOCALIZATION	METABOLISM	142	0	TRANSCRIPTION	142	1
mc7000929	TRANSCRIPTION;PROTEIN WITH BINDING FUNCTION OR COFACTOR REQUIREMENT (structural or catalytic);CELL FATE;SUBCELLULAR LOCALIZATION	ENERGY	142	0	TRANSCRIPTION	142	1
mc17000202	TRANSCRIPTION;PROTEIN WITH BINDING FUNCTION OR COFACTOR REQUIREMENT (structural or catalytic);SUBCELLULAR LOCALIZATION	METABOLISM	140	0	TRANSCRIPTION	140	1
mc12001081	PROTEIN WITH BINDING FUNCTION OR COFACTOR REQUIREMENT (structural or catalytic);CELLULAR TRANSPORT TRANSPORT FACILITIES AND TRANSPORT ROUTES;SUBCELLULAR LOCALIZATION	PROTEIN FATE (folding modification destination)	138	0	PROTEIN WITH BINDING FUNCTION OR COFACTOR REQUIREMENT (structural or catalytic)	138	1
mc5000082	METABOLISM;PROTEIN WITH BINDING FUNCTION OR COFACTOR REQUIREMENT (structural or catalytic);SUBCELLULAR LOCALIZATION	CELL CYCLE AND DNA PROCESSING	138	0	SUBCELLULAR LOCALIZATION	138	1
mc9000525	REGULATION OF METABOLISM AND PROTEIN FUNCTION;CELLULAR COMMUNICATION/SIGNAL TRANSDUCTION MECHANISM;DEVELOPMENT (Systemic)	PROTEIN WITH BINDING FUNCTION OR COFACTOR REQUIREMENT (structural or catalytic)	136	0	REGULATION OF METABOLISM AND PROTEIN FUNCTION	136	1
mc10000360	PROTEIN FATE (folding modification destination);PROTEIN WITH BINDING FUNCTION OR COFACTOR REQUIREMENT (structural or catalytic);SUBCELLULAR LOCALIZATION	TRANSCRIPTION	133	0	PROTEIN WITH BINDING FUNCTION OR COFACTOR REQUIREMENT (structural or catalytic)	133	1
mc10000071	SUBCELLULAR LOCALIZATION	METABOLISM	132	0	SUBCELLULAR LOCALIZATION	132	1
mc19000067	CELL CYCLE AND DNA PROCESSING;BIOGENESIS OF CELLULAR COMPONENTS;SUBCELLULAR LOCALIZATION	PROTEIN WITH BINDING FUNCTION OR COFACTOR REQUIREMENT (structural or catalytic)	130	0	SUBCELLULAR LOCALIZATION	130	1
mc4002089	CELL CYCLE AND DNA PROCESSING;SUBCELLULAR LOCALIZATION	CELL FATE	130	0	SUBCELLULAR LOCALIZATION	130	1
mc9000762	PROTEIN WITH BINDING FUNCTION OR COFACTOR REQUIREMENT (structural or catalytic);CELLULAR COMMUNICATION/SIGNAL TRANSDUCTION MECHANISM	PROTEIN FATE (folding modification destination)	129	0	PROTEIN WITH BINDING FUNCTION OR COFACTOR REQUIREMENT (structural or catalytic)	129	1
mc4000757	METABOLISM;CELL CYCLE AND DNA PROCESSING;PROTEIN WITH BINDING FUNCTION OR COFACTOR REQUIREMENT (structural or catalytic);SUBCELLULAR LOCALIZATION	TRANSCRIPTION	128	0	PROTEIN WITH BINDING FUNCTION OR COFACTOR REQUIREMENT (structural or catalytic)	128	1
mc11001333	SUBCELLULAR LOCALIZATION	CELLULAR TRANSPORT TRANSPORT FACILITIES AND TRANSPORT ROUTES	127	0	SUBCELLULAR LOCALIZATION	127	1
mc11002215	CELLULAR COMMUNICATION/SIGNAL TRANSDUCTION MECHANISM;ORGAN DIFFERENTIATION;SUBCELLULAR LOCALIZATION	PROTEIN WITH BINDING FUNCTION OR COFACTOR REQUIREMENT (structural or catalytic)	126	0	CELLULAR COMMUNICATION/SIGNAL TRANSDUCTION MECHANISM	126	1
mc17000058	TRANSCRIPTION;SUBCELLULAR LOCALIZATION	PROTEIN WITH BINDING FUNCTION OR COFACTOR REQUIREMENT (structural or catalytic)	125	0	SUBCELLULAR LOCALIZATION	125	1
mc8000347	METABOLISM	PROTEIN WITH BINDING FUNCTION OR COFACTOR REQUIREMENT (structural or catalytic)	124	0	METABOLISM	62	1
mc17000584	CELL CYCLE AND DNA PROCESSING;REGULATION OF METABOLISM AND PROTEIN FUNCTION;CELL FATE;SUBCELLULAR LOCALIZATION	METABOLISM	121	0	CELL CYCLE AND DNA PROCESSING	121	1
mc9001831	METABOLISM;PROTEIN WITH BINDING FUNCTION OR COFACTOR REQUIREMENT (structural or catalytic);SUBCELLULAR LOCALIZATION	PROTEIN FATE (folding modification destination)	121	0	SUBCELLULAR LOCALIZATION	121	1
mc7000420	BIOGENESIS OF CELLULAR COMPONENTS;SUBCELLULAR LOCALIZATION	METABOLISM	119	0	SUBCELLULAR LOCALIZATION	119	1
mc12001458	CELL CYCLE AND DNA PROCESSING	TRANSCRIPTION	116	0	CELL CYCLE AND DNA PROCESSING	70	1
mc15000593	PROTEIN WITH BINDING FUNCTION OR COFACTOR REQUIREMENT (structural or catalytic);BIOGENESIS OF CELLULAR COMPONENTS;SUBCELLULAR LOCALIZATION	CELLULAR COMMUNICATION/SIGNAL TRANSDUCTION MECHANISM	116	0	PROTEIN WITH BINDING FUNCTION OR COFACTOR REQUIREMENT (structural or catalytic)	67	1
mc1000348	PROTEIN WITH BINDING FUNCTION OR COFACTOR REQUIREMENT (structural or catalytic)	TRANSCRIPTION	115	0	PROTEIN WITH BINDING FUNCTION OR COFACTOR REQUIREMENT (structural or catalytic)	115	1
mc1001832	ENERGY;CELLULAR TRANSPORT TRANSPORT FACILITIES AND TRANSPORT ROUTES;SUBCELLULAR LOCALIZATION	METABOLISM	113	0	ENERGY	113	1
mc18000451	SYSTEMIC INTERACTION WITH THE ENVIRONMENT;CELL FATE;SUBCELLULAR LOCALIZATION;CELL TYPE LOCALIZATION	CELLULAR COMMUNICATION/SIGNAL TRANSDUCTION MECHANISM	113	0	SYSTEMIC INTERACTION WITH THE ENVIRONMENT	113	1
mc12000150	CELL CYCLE AND DNA PROCESSING;PROTEIN WITH BINDING FUNCTION OR COFACTOR REQUIREMENT (structural or catalytic);SUBCELLULAR LOCALIZATION	CELL FATE	110	0	SUBCELLULAR LOCALIZATION	110	1
mc1001272	CELLULAR TRANSPORT TRANSPORT FACILITIES AND TRANSPORT ROUTES	PROTEIN FATE (folding modification destination)	108	0	CELLULAR TRANSPORT TRANSPORT FACILITIES AND TRANSPORT ROUTES	108	1
mc11001617	PROTEIN FATE (folding modification destination);PROTEIN WITH BINDING FUNCTION OR COFACTOR REQUIREMENT (structural or catalytic);REGULATION OF METABOLISM AND PROTEIN FUNCTION;CELL RESCUE DEFENSE AND VIRULENCE;SUBCELLULAR LOCALIZATION	TRANSCRIPTION	108	0	PROTEIN FATE (folding modification destination)	108	1
mc7000519	TRANSCRIPTION	CELL CYCLE AND DNA PROCESSING	108	0	TRANSCRIPTION	107	1
mc3001314	PROTEIN WITH BINDING FUNCTION OR COFACTOR REQUIREMENT (structural or catalytic);SUBCELLULAR LOCALIZATION	CELL CYCLE AND DNA PROCESSING	107	0	PROTEIN WITH BINDING FUNCTION OR COFACTOR REQUIREMENT (structural or catalytic)	107	1
mc6002334	CELLULAR TRANSPORT TRANSPORT FACILITIES AND TRANSPORT ROUTES;CELL FATE;DEVELOPMENT (Systemic);TISSUE DIFFERENTIATION;SUBCELLULAR LOCALIZATION	PROTEIN WITH BINDING FUNCTION OR COFACTOR REQUIREMENT (structural or catalytic)	106	0	CELLULAR TRANSPORT TRANSPORT FACILITIES AND TRANSPORT ROUTES	106	1
mc9000678	PROTEIN WITH BINDING FUNCTION OR COFACTOR REQUIREMENT (structural or catalytic);SUBCELLULAR LOCALIZATION	PROTEIN FATE (folding modification destination)	106	0	PROTEIN WITH BINDING FUNCTION OR COFACTOR REQUIREMENT (structural or catalytic)	106	1
mc17001101	PROTEIN FATE (folding modification destination);BIOGENESIS OF CELLULAR COMPONENTS;SUBCELLULAR LOCALIZATION	METABOLISM	105	0	PROTEIN FATE (folding modification destination)	105	1
mcx000219	PROTEIN WITH BINDING FUNCTION OR COFACTOR REQUIREMENT (structural or catalytic);SUBCELLULAR LOCALIZATION	PROTEIN FATE (folding modification destination)	105	0	SUBCELLULAR LOCALIZATION	105	1
mcx000711	METABOLISM;ENERGY;PROTEIN WITH BINDING FUNCTION OR COFACTOR REQUIREMENT (structural or catalytic);CELLULAR TRANSPORT TRANSPORT FACILITIES AND TRANSPORT ROUTES;SUBCELLULAR LOCALIZATION	PROTEIN FATE (folding modification destination)	105	0	PROTEIN WITH BINDING FUNCTION OR COFACTOR REQUIREMENT (structural or catalytic)	105	1
mc18000630	PROTEIN WITH BINDING FUNCTION OR COFACTOR REQUIREMENT (structural or catalytic)	SUBCELLULAR LOCALIZATION	104	0	PROTEIN WITH BINDING FUNCTION OR COFACTOR REQUIREMENT (structural or catalytic)	90	1
mc19001119	CELLULAR TRANSPORT TRANSPORT FACILITIES AND TRANSPORT ROUTES	PROTEIN WITH BINDING FUNCTION OR COFACTOR REQUIREMENT (structural or catalytic)	104	0	CELLULAR TRANSPORT TRANSPORT FACILITIES AND TRANSPORT ROUTES	104	1
mc6001263	PROTEIN WITH BINDING FUNCTION OR COFACTOR REQUIREMENT (structural or catalytic);CELLULAR COMMUNICATION/SIGNAL TRANSDUCTION MECHANISM;SUBCELLULAR LOCALIZATION	INTERACTION WITH THE ENVIRONMENT	103	0	SUBCELLULAR LOCALIZATION	103	1
mc12001137	PROTEIN WITH BINDING FUNCTION OR COFACTOR REQUIREMENT (structural or catalytic)	SUBCELLULAR LOCALIZATION	102	0	PROTEIN WITH BINDING FUNCTION OR COFACTOR REQUIREMENT (structural or catalytic)	87	1
mc3001080	PROTEIN WITH BINDING FUNCTION OR COFACTOR REQUIREMENT (structural or catalytic);CELLULAR TRANSPORT TRANSPORT FACILITIES AND TRANSPORT ROUTES;DEVELOPMENT (Systemic);SUBCELLULAR LOCALIZATION	PROTEIN FATE (folding modification destination)	102	0	PROTEIN WITH BINDING FUNCTION OR COFACTOR REQUIREMENT (structural or catalytic)	102	1
mc4000068	METABOLISM;PROTEIN FATE (folding modification destination);SUBCELLULAR LOCALIZATION	PROTEIN WITH BINDING FUNCTION OR COFACTOR REQUIREMENT (structural or catalytic)	102	0	SUBCELLULAR LOCALIZATION	102	1
mc10000578	PROTEIN FATE (folding modification destination);SUBCELLULAR LOCALIZATION	CELLULAR TRANSPORT TRANSPORT FACILITIES AND TRANSPORT ROUTES	100	0	SUBCELLULAR LOCALIZATION	100	1
mc10001405	PROTEIN FATE (folding modification destination);PROTEIN WITH BINDING FUNCTION OR COFACTOR REQUIREMENT (structural or catalytic)	TRANSCRIPTION	100	0	PROTEIN FATE (folding modification destination)	100	1
mc17001701	CELLULAR TRANSPORT TRANSPORT FACILITIES AND TRANSPORT ROUTES;SUBCELLULAR LOCALIZATION	PROTEIN FATE (folding modification destination)	100	0	SUBCELLULAR LOCALIZATION	100	1
mc8001453	TRANSCRIPTION;PROTEIN WITH BINDING FUNCTION OR COFACTOR REQUIREMENT (structural or catalytic);SUBCELLULAR LOCALIZATION	METABOLISM	100	0	TRANSCRIPTION	100	1
mc9002054	INTERACTION WITH THE ENVIRONMENT;SYSTEMIC INTERACTION WITH THE ENVIRONMENT;CELL FATE;SUBCELLULAR LOCALIZATION	CELLULAR TRANSPORT TRANSPORT FACILITIES AND TRANSPORT ROUTES	99	0	INTERACTION WITH THE ENVIRONMENT	53	1
mc11002345	METABOLISM;TRANSCRIPTION;SUBCELLULAR LOCALIZATION	CELL CYCLE AND DNA PROCESSING	96	0	METABOLISM	0	1
mc7000506	INTERACTION WITH THE ENVIRONMENT;CELL FATE;BIOGENESIS OF CELLULAR COMPONENTS;SUBCELLULAR LOCALIZATION	ORGAN DIFFERENTIATION	96	0	SUBCELLULAR LOCALIZATION	96	1
mc13001522	TRANSCRIPTION;SUBCELLULAR LOCALIZATION	PROTEIN WITH BINDING FUNCTION OR COFACTOR REQUIREMENT (structural or catalytic)	95	0	TRANSCRIPTION	49	1
mc16000687	CELLULAR COMMUNICATION/SIGNAL TRANSDUCTION MECHANISM;INTERACTION WITH THE ENVIRONMENT;SUBCELLULAR LOCALIZATION	PROTEIN WITH BINDING FUNCTION OR COFACTOR REQUIREMENT (structural or catalytic)	95	0	CELLULAR COMMUNICATION/SIGNAL TRANSDUCTION MECHANISM	95	1
mc5001111	SUBCELLULAR LOCALIZATION	PROTEIN WITH BINDING FUNCTION OR COFACTOR REQUIREMENT (structural or catalytic)	95	0	SUBCELLULAR LOCALIZATION	95	1
mc6001286	PROTEIN WITH BINDING FUNCTION OR COFACTOR REQUIREMENT (structural or catalytic);CELLULAR TRANSPORT TRANSPORT FACILITIES AND TRANSPORT ROUTES;BIOGENESIS OF CELLULAR COMPONENTS;SUBCELLULAR LOCALIZATION	PROTEIN FATE (folding modification destination)	95	0	CELLULAR TRANSPORT TRANSPORT FACILITIES AND TRANSPORT ROUTES	95	1
mc7002386	PROTEIN WITH BINDING FUNCTION OR COFACTOR REQUIREMENT (structural or catalytic)	PROTEIN FATE (folding modification destination)	94	0	PROTEIN WITH BINDING FUNCTION OR COFACTOR REQUIREMENT (structural or catalytic)	94	1
mc19000548	PROTEIN WITH BINDING FUNCTION OR COFACTOR REQUIREMENT (structural or catalytic);BIOGENESIS OF CELLULAR COMPONENTS;SUBCELLULAR LOCALIZATION	CELL CYCLE AND DNA PROCESSING	93	0	PROTEIN WITH BINDING FUNCTION OR COFACTOR REQUIREMENT (structural or catalytic)	93	1
mc2000525	METABOLISM;SUBCELLULAR LOCALIZATION	CELL RESCUE DEFENSE AND VIRULENCE	93	0	SUBCELLULAR LOCALIZATION	93	1
mc3000515	METABOLISM;CELL CYCLE AND DNA PROCESSING;SUBCELLULAR LOCALIZATION	PROTEIN WITH BINDING FUNCTION OR COFACTOR REQUIREMENT (structural or catalytic)	93	0	CELL CYCLE AND DNA PROCESSING	54	1
mc6002145	CELL RESCUE DEFENSE AND VIRULENCE;SUBCELLULAR LOCALIZATION;ORGAN LOCALIZATION	METABOLISM	93	0	SUBCELLULAR LOCALIZATION	93	1
mc2000488	BIOGENESIS OF CELLULAR COMPONENTS	PROTEIN FATE (folding modification destination)	91	0	BIOGENESIS OF CELLULAR COMPONENTS	91	1
mc5002106	TRANSCRIPTION;PROTEIN FATE (folding modification destination);PROTEIN WITH BINDING FUNCTION OR COFACTOR REQUIREMENT (structural or catalytic);REGULATION OF METABOLISM AND PROTEIN FUNCTION;SUBCELLULAR LOCALIZATION	PROTEIN SYNTHESIS	91	0	PROTEIN FATE (folding modification destination)	87	1
mc5001760	PROTEIN WITH BINDING FUNCTION OR COFACTOR REQUIREMENT (structural or catalytic)	CELL CYCLE AND DNA PROCESSING	88	0	PROTEIN WITH BINDING FUNCTION OR COFACTOR REQUIREMENT (structural or catalytic)	88	1
mc12001200	CELL CYCLE AND DNA PROCESSING;PROTEIN FATE (folding modification destination);PROTEIN WITH BINDING FUNCTION OR COFACTOR REQUIREMENT (structural or catalytic)	TRANSCRIPTION	84	0	PROTEIN WITH BINDING FUNCTION OR COFACTOR REQUIREMENT (structural or catalytic)	84	1
mc8001635	CELLULAR TRANSPORT TRANSPORT FACILITIES AND TRANSPORT ROUTES;SUBCELLULAR LOCALIZATION	PROTEIN WITH BINDING FUNCTION OR COFACTOR REQUIREMENT (structural or catalytic)	84	0	CELLULAR TRANSPORT TRANSPORT FACILITIES AND TRANSPORT ROUTES	84	1
mc10002046	PROTEIN WITH BINDING FUNCTION OR COFACTOR REQUIREMENT (structural or catalytic);CELLULAR COMMUNICATION/SIGNAL TRANSDUCTION MECHANISM;CELL FATE;DEVELOPMENT (Systemic);CELL TYPE DIFFERENTIATION;SUBCELLULAR LOCALIZATION	CELL CYCLE AND DNA PROCESSING	83	0	PROTEIN WITH BINDING FUNCTION OR COFACTOR REQUIREMENT (structural or catalytic)	83	1
mc4002133	SUBCELLULAR LOCALIZATION	PROTEIN WITH BINDING FUNCTION OR COFACTOR REQUIREMENT (structural or catalytic)	81	0	SUBCELLULAR LOCALIZATION	81	1
mc4001997	TRANSCRIPTION;SUBCELLULAR LOCALIZATION	PROTEIN WITH BINDING FUNCTION OR COFACTOR REQUIREMENT (structural or catalytic)	80	0	SUBCELLULAR LOCALIZATION	80	1
mc4000307	PROTEIN WITH BINDING FUNCTION OR COFACTOR REQUIREMENT (structural or catalytic);SUBCELLULAR LOCALIZATION	TRANSCRIPTION	79	0	SUBCELLULAR LOCALIZATION	79	1
mc17000404	METABOLISM;PROTEIN WITH BINDING FUNCTION OR COFACTOR REQUIREMENT (structural or catalytic);SUBCELLULAR LOCALIZATION	BIOGENESIS OF CELLULAR COMPONENTS	75	0	SUBCELLULAR LOCALIZATION	75	1
mc17001264	CELLULAR COMMUNICATION/SIGNAL TRANSDUCTION MECHANISM	PROTEIN WITH BINDING FUNCTION OR COFACTOR REQUIREMENT (structural or catalytic)	74	0	CELLULAR COMMUNICATION/SIGNAL TRANSDUCTION MECHANISM	74	1
mcx000821	SUBCELLULAR LOCALIZATION;TISSUE LOCALIZATION;ORGAN LOCALIZATION	CELL FATE	73	0	SUBCELLULAR LOCALIZATION	73	1
mc18001183	PROTEIN WITH BINDING FUNCTION OR COFACTOR REQUIREMENT (structural or catalytic)	PROTEIN SYNTHESIS	72	0	PROTEIN WITH BINDING FUNCTION OR COFACTOR REQUIREMENT (structural or catalytic)	72	1
mc8001235	SUBCELLULAR LOCALIZATION	CELL CYCLE AND DNA PROCESSING	71	0	SUBCELLULAR LOCALIZATION	71	1
mc10000474	CELLULAR TRANSPORT TRANSPORT FACILITIES AND TRANSPORT ROUTES	PROTEIN FATE (folding modification destination)	69	0	CELLULAR TRANSPORT TRANSPORT FACILITIES AND TRANSPORT ROUTES	69	1
mc17000850	PROTEIN WITH BINDING FUNCTION OR COFACTOR REQUIREMENT (structural or catalytic)	PROTEIN FATE (folding modification destination)	69	0	PROTEIN WITH BINDING FUNCTION OR COFACTOR REQUIREMENT (structural or catalytic)	69	1
mc5000381	SUBCELLULAR LOCALIZATION	BIOGENESIS OF CELLULAR COMPONENTS	68	0	SUBCELLULAR LOCALIZATION	68	1
mc6000011	CELLULAR TRANSPORT TRANSPORT FACILITIES AND TRANSPORT ROUTES;SUBCELLULAR LOCALIZATION	PROTEIN FATE (folding modification destination)	68	0	CELLULAR TRANSPORT TRANSPORT FACILITIES AND TRANSPORT ROUTES	68	1
mc7001252	CELL FATE	PROTEIN WITH BINDING FUNCTION OR COFACTOR REQUIREMENT (structural or catalytic)	67	0	CELL FATE	67	1
mc17001064	PROTEIN FATE (folding modification destination);PROTEIN WITH BINDING FUNCTION OR COFACTOR REQUIREMENT (structural or catalytic);CELLULAR TRANSPORT TRANSPORT FACILITIES AND TRANSPORT ROUTES	TRANSCRIPTION	66	0	PROTEIN FATE (folding modification destination)	66	1
mc5002040	TRANSCRIPTION;PROTEIN WITH BINDING FUNCTION OR COFACTOR REQUIREMENT (structural or catalytic);SUBCELLULAR LOCALIZATION	METABOLISM	65	0	TRANSCRIPTION	65	1
mcx001363	PROTEIN SYNTHESIS	PROTEIN WITH BINDING FUNCTION OR COFACTOR REQUIREMENT (structural or catalytic)	65	0	PROTEIN SYNTHESIS	57	1
mc1000504	PROTEIN FATE (folding modification destination)	METABOLISM	64	0	PROTEIN FATE (folding modification destination)	64	1
mc11001785	PROTEIN WITH BINDING FUNCTION OR COFACTOR REQUIREMENT (structural or catalytic);CELLULAR TRANSPORT TRANSPORT FACILITIES AND TRANSPORT ROUTES;INTERACTION WITH THE ENVIRONMENT;BIOGENESIS OF CELLULAR COMPONENTS;SUBCELLULAR LOCALIZATION	ENERGY	64	0	PROTEIN WITH BINDING FUNCTION OR COFACTOR REQUIREMENT (structural or catalytic)	64	1
mc11002059	PROTEIN WITH BINDING FUNCTION OR COFACTOR REQUIREMENT (structural or catalytic)	PROTEIN FATE (folding modification destination)	64	0	PROTEIN WITH BINDING FUNCTION OR COFACTOR REQUIREMENT (structural or catalytic)	64	1
mc3000544	PROTEIN WITH BINDING FUNCTION OR COFACTOR REQUIREMENT (structural or catalytic);SUBCELLULAR LOCALIZATION	METABOLISM	64	0	PROTEIN WITH BINDING FUNCTION OR COFACTOR REQUIREMENT (structural or catalytic)	64	1
mc19000625	PROTEIN WITH BINDING FUNCTION OR COFACTOR REQUIREMENT (structural or catalytic);SUBCELLULAR LOCALIZATION	PROTEIN SYNTHESIS	62	0	PROTEIN WITH BINDING FUNCTION OR COFACTOR REQUIREMENT (structural or catalytic)	62	1
mc4000749	CELLULAR TRANSPORT TRANSPORT FACILITIES AND TRANSPORT ROUTES;SUBCELLULAR LOCALIZATION	PROTEIN WITH BINDING FUNCTION OR COFACTOR REQUIREMENT (structural or catalytic)	62	0	CELLULAR TRANSPORT TRANSPORT FACILITIES AND TRANSPORT ROUTES	62	1
mc8002051	PROTEIN WITH BINDING FUNCTION OR COFACTOR REQUIREMENT (structural or catalytic);CELLULAR TRANSPORT TRANSPORT FACILITIES AND TRANSPORT ROUTES;SUBCELLULAR LOCALIZATION	CELL CYCLE AND DNA PROCESSING	62	0	PROTEIN WITH BINDING FUNCTION OR COFACTOR REQUIREMENT (structural or catalytic)	62	1
mc7002800	SUBCELLULAR LOCALIZATION	SYSTEMIC INTERACTION WITH THE ENVIRONMENT	61	0	SUBCELLULAR LOCALIZATION	61	1
mc12001647	SUBCELLULAR LOCALIZATION	CELLULAR COMMUNICATION/SIGNAL TRANSDUCTION MECHANISM	60	0	SUBCELLULAR LOCALIZATION	60	1
mc14001224	PROTEIN FATE (folding modification destination);PROTEIN WITH BINDING FUNCTION OR COFACTOR REQUIREMENT (structural or catalytic);REGULATION OF METABOLISM AND PROTEIN FUNCTION;CELLULAR COMMUNICATION/SIGNAL TRANSDUCTION MECHANISM;SUBCELLULAR LOCALIZATION	METABOLISM	60	0	PROTEIN FATE (folding modification destination)	55	1
mc2002725	PROTEIN WITH BINDING FUNCTION OR COFACTOR REQUIREMENT (structural or catalytic)	PROTEIN SYNTHESIS	60	0	PROTEIN WITH BINDING FUNCTION OR COFACTOR REQUIREMENT (structural or catalytic)	60	1
mc7002625	PROTEIN FATE (folding modification destination)	METABOLISM	60	0	PROTEIN FATE (folding modification destination)	60	1
mc9000357	PROTEIN WITH BINDING FUNCTION OR COFACTOR REQUIREMENT (structural or catalytic)	CELL CYCLE AND DNA PROCESSING	60	0	PROTEIN WITH BINDING FUNCTION OR COFACTOR REQUIREMENT (structural or catalytic)	60	1
mc17001414	METABOLISM;PROTEIN FATE (folding modification destination);PROTEIN WITH BINDING FUNCTION OR COFACTOR REQUIREMENT (structural or catalytic)	CELL CYCLE AND DNA PROCESSING	59	0	PROTEIN FATE (folding modification destination)	59	1
mc9002112	SUBCELLULAR LOCALIZATION	PROTEIN WITH BINDING FUNCTION OR COFACTOR REQUIREMENT (structural or catalytic)	59	0	SUBCELLULAR LOCALIZATION	59	1
mc12000070	METABOLISM;CELLULAR TRANSPORT TRANSPORT FACILITIES AND TRANSPORT ROUTES;SUBCELLULAR LOCALIZATION	PROTEIN WITH BINDING FUNCTION OR COFACTOR REQUIREMENT (structural or catalytic)	57	0	SUBCELLULAR LOCALIZATION	57	1
mc4001830	PROTEIN SYNTHESIS;PROTEIN WITH BINDING FUNCTION OR COFACTOR REQUIREMENT (structural or catalytic);SUBCELLULAR LOCALIZATION	TRANSCRIPTION	57	0	PROTEIN WITH BINDING FUNCTION OR COFACTOR REQUIREMENT (structural or catalytic)	57	1
mc1001663	METABOLISM;PROTEIN SYNTHESIS;PROTEIN FATE (folding modification destination);PROTEIN WITH BINDING FUNCTION OR COFACTOR REQUIREMENT (structural or catalytic);CELLULAR COMMUNICATION/SIGNAL TRANSDUCTION MECHANISM;CELL RESCUE DEFENSE AND VIRULENCE	CELL CYCLE AND DNA PROCESSING	56	0	PROTEIN WITH BINDING FUNCTION OR COFACTOR REQUIREMENT (structural or catalytic)	56	1
mc19000257	CELLULAR COMMUNICATION/SIGNAL TRANSDUCTION MECHANISM;SUBCELLULAR LOCALIZATION	PROTEIN WITH BINDING FUNCTION OR COFACTOR REQUIREMENT (structural or catalytic)	55	0	SUBCELLULAR LOCALIZATION	55	1
mc13000704	PROTEIN WITH BINDING FUNCTION OR COFACTOR REQUIREMENT (structural or catalytic);CELLULAR TRANSPORT TRANSPORT FACILITIES AND TRANSPORT ROUTES;SUBCELLULAR LOCALIZATION	TRANSCRIPTION	54	0	PROTEIN WITH BINDING FUNCTION OR COFACTOR REQUIREMENT (structural or catalytic)	54	1
mc2000359	PROTEIN WITH BINDING FUNCTION OR COFACTOR REQUIREMENT (structural or catalytic);CELLULAR TRANSPORT TRANSPORT FACILITIES AND TRANSPORT ROUTES;SUBCELLULAR LOCALIZATION	METABOLISM	54	0	PROTEIN WITH BINDING FUNCTION OR COFACTOR REQUIREMENT (structural or catalytic)	54	1
mc1001252	ENERGY;PROTEIN WITH BINDING FUNCTION OR COFACTOR REQUIREMENT (structural or catalytic);CELLULAR TRANSPORT TRANSPORT FACILITIES AND TRANSPORT ROUTES;SUBCELLULAR LOCALIZATION	METABOLISM	53	0	PROTEIN WITH BINDING FUNCTION OR COFACTOR REQUIREMENT (structural or catalytic)	53	1
mc6001053	METABOLISM;SUBCELLULAR LOCALIZATION	PROTEIN WITH BINDING FUNCTION OR COFACTOR REQUIREMENT (structural or catalytic)	53	0	METABOLISM	0	1
mc6002188	CELLULAR COMMUNICATION/SIGNAL TRANSDUCTION MECHANISM;SUBCELLULAR LOCALIZATION	PROTEIN WITH BINDING FUNCTION OR COFACTOR REQUIREMENT (structural or catalytic)	53	0	CELLULAR COMMUNICATION/SIGNAL TRANSDUCTION MECHANISM	53	1
mc8000655	PROTEIN WITH BINDING FUNCTION OR COFACTOR REQUIREMENT (structural or catalytic);SUBCELLULAR LOCALIZATION	CELLULAR COMMUNICATION/SIGNAL TRANSDUCTION MECHANISM	53	0	SUBCELLULAR LOCALIZATION	53	1
mc10000437	PROTEIN WITH BINDING FUNCTION OR COFACTOR REQUIREMENT (structural or catalytic)	METABOLISM	52	0	PROTEIN WITH BINDING FUNCTION OR COFACTOR REQUIREMENT (structural or catalytic)	52	1
mc11001974	PROTEIN WITH BINDING FUNCTION OR COFACTOR REQUIREMENT (structural or catalytic);CELLULAR TRANSPORT TRANSPORT FACILITIES AND TRANSPORT ROUTES;BIOGENESIS OF CELLULAR COMPONENTS;SUBCELLULAR LOCALIZATION	PROTEIN FATE (folding modification destination)	52	0	CELLULAR TRANSPORT TRANSPORT FACILITIES AND TRANSPORT ROUTES	52	1
mc3001020	PROTEIN WITH BINDING FUNCTION OR COFACTOR REQUIREMENT (structural or catalytic)	CELL CYCLE AND DNA PROCESSING	52	0	PROTEIN WITH BINDING FUNCTION OR COFACTOR REQUIREMENT (structural or catalytic)	52	1
mc5000597	TRANSCRIPTION;PROTEIN WITH BINDING FUNCTION OR COFACTOR REQUIREMENT (structural or catalytic);SUBCELLULAR LOCALIZATION	SYSTEMIC INTERACTION WITH THE ENVIRONMENT	52	0	SUBCELLULAR LOCALIZATION	52	1
mc7000625	TRANSCRIPTION;PROTEIN WITH BINDING FUNCTION OR COFACTOR REQUIREMENT (structural or catalytic);SUBCELLULAR LOCALIZATION	METABOLISM	52	0	TRANSCRIPTION	52	1
mc7000413	CELLULAR COMMUNICATION/SIGNAL TRANSDUCTION MECHANISM;INTERACTION WITH THE ENVIRONMENT;SYSTEMIC INTERACTION WITH THE ENVIRONMENT;BIOGENESIS OF CELLULAR COMPONENTS;SUBCELLULAR LOCALIZATION	PROTEIN WITH BINDING FUNCTION OR COFACTOR REQUIREMENT (structural or catalytic)	51	0	INTERACTION WITH THE ENVIRONMENT	51	1
mc7000422	PROTEIN WITH BINDING FUNCTION OR COFACTOR REQUIREMENT (structural or catalytic);INTERACTION WITH THE ENVIRONMENT	CELLULAR COMMUNICATION/SIGNAL TRANSDUCTION MECHANISM	51	0	INTERACTION WITH THE ENVIRONMENT	51	1
mc9001960	CELL RESCUE DEFENSE AND VIRULENCE;SYSTEMIC INTERACTION WITH THE ENVIRONMENT;SUBCELLULAR LOCALIZATION	REGULATION OF METABOLISM AND PROTEIN FUNCTION	51	0	CELL RESCUE DEFENSE AND VIRULENCE	51	1
mc15001502	CELLULAR COMMUNICATION/SIGNAL TRANSDUCTION MECHANISM;SUBCELLULAR LOCALIZATION	PROTEIN WITH BINDING FUNCTION OR COFACTOR REQUIREMENT (structural or catalytic)	50	0	CELLULAR COMMUNICATION/SIGNAL TRANSDUCTION MECHANISM	50	1
mc15001629	METABOLISM;ENERGY;REGULATION OF METABOLISM AND PROTEIN FUNCTION;CELLULAR COMMUNICATION/SIGNAL TRANSDUCTION MECHANISM	TRANSCRIPTION	50	0	REGULATION OF METABOLISM AND PROTEIN FUNCTION	50	1
mc16000303	TRANSCRIPTION;PROTEIN WITH BINDING FUNCTION OR COFACTOR REQUIREMENT (structural or catalytic);SUBCELLULAR LOCALIZATION	METABOLISM	49	0	TRANSCRIPTION	49	1
mc7002437	CELLULAR TRANSPORT TRANSPORT FACILITIES AND TRANSPORT ROUTES	PROTEIN WITH BINDING FUNCTION OR COFACTOR REQUIREMENT (structural or catalytic)	49	0	CELLULAR TRANSPORT TRANSPORT FACILITIES AND TRANSPORT ROUTES	49	1
mc8001226	PROTEIN WITH BINDING FUNCTION OR COFACTOR REQUIREMENT (structural or catalytic)	METABOLISM	49	0	PROTEIN WITH BINDING FUNCTION OR COFACTOR REQUIREMENT (structural or catalytic)	49	1
mc9002106	CELLULAR COMMUNICATION/SIGNAL TRANSDUCTION MECHANISM;SUBCELLULAR LOCALIZATION	PROTEIN WITH BINDING FUNCTION OR COFACTOR REQUIREMENT (structural or catalytic)	49	0	CELLULAR COMMUNICATION/SIGNAL TRANSDUCTION MECHANISM	49	1
mc4000622	DEVELOPMENT (Systemic);SUBCELLULAR LOCALIZATION	PROTEIN FATE (folding modification destination)	48	0	SUBCELLULAR LOCALIZATION	48	1
mc7000271	PROTEIN FATE (folding modification destination);SUBCELLULAR LOCALIZATION	DEVELOPMENT (Systemic)	48	0	SUBCELLULAR LOCALIZATION	48	1
mc7000548	TRANSCRIPTION;SUBCELLULAR LOCALIZATION	PROTEIN WITH BINDING FUNCTION OR COFACTOR REQUIREMENT (structural or catalytic)	48	0	SUBCELLULAR LOCALIZATION	48	1
mc11000715	CELL FATE;SUBCELLULAR LOCALIZATION	PROTEIN WITH BINDING FUNCTION OR COFACTOR REQUIREMENT (structural or catalytic)	47	0	SUBCELLULAR LOCALIZATION	47	1
mc2003223	TRANSCRIPTION;PROTEIN WITH BINDING FUNCTION OR COFACTOR REQUIREMENT (structural or catalytic)	METABOLISM	47	0	TRANSCRIPTION	47	1
mc7000930	PROTEIN WITH BINDING FUNCTION OR COFACTOR REQUIREMENT (structural or catalytic);CELLULAR TRANSPORT TRANSPORT FACILITIES AND TRANSPORT ROUTES;SUBCELLULAR LOCALIZATION	PROTEIN FATE (folding modification destination)	47	0	PROTEIN WITH BINDING FUNCTION OR COFACTOR REQUIREMENT (structural or catalytic)	47	1
mc3001962	PROTEIN WITH BINDING FUNCTION OR COFACTOR REQUIREMENT (structural or catalytic);REGULATION OF METABOLISM AND PROTEIN FUNCTION;CELLULAR COMMUNICATION/SIGNAL TRANSDUCTION MECHANISM	PROTEIN FATE (folding modification destination)	46	0	PROTEIN WITH BINDING FUNCTION OR COFACTOR REQUIREMENT (structural or catalytic)	46	1
mc8001363	PROTEIN FATE (folding modification destination);CELL FATE	CELL CYCLE AND DNA PROCESSING	46	0	PROTEIN FATE (folding modification destination)	46	1
mcx001445	CELLULAR TRANSPORT TRANSPORT FACILITIES AND TRANSPORT ROUTES	PROTEIN WITH BINDING FUNCTION OR COFACTOR REQUIREMENT (structural or catalytic)	46	0	CELLULAR TRANSPORT TRANSPORT FACILITIES AND TRANSPORT ROUTES	46	1
mc19000081	CELL CYCLE AND DNA PROCESSING;PROTEIN WITH BINDING FUNCTION OR COFACTOR REQUIREMENT (structural or catalytic);SUBCELLULAR LOCALIZATION	METABOLISM	45	0	CELL CYCLE AND DNA PROCESSING	45	1
mc7002422	CELLULAR COMMUNICATION/SIGNAL TRANSDUCTION MECHANISM;SYSTEMIC INTERACTION WITH THE ENVIRONMENT;SUBCELLULAR LOCALIZATION	METABOLISM	45	0	CELLULAR COMMUNICATION/SIGNAL TRANSDUCTION MECHANISM	45	1
mc1000115	METABOLISM;SUBCELLULAR LOCALIZATION	BIOGENESIS OF CELLULAR COMPONENTS	44	0	SUBCELLULAR LOCALIZATION	44	1
mc1001567	SUBCELLULAR LOCALIZATION	CELL FATE	44	0	SUBCELLULAR LOCALIZATION	44	1
mc19000269	CELL CYCLE AND DNA PROCESSING;PROTEIN WITH BINDING FUNCTION OR COFACTOR REQUIREMENT (structural or catalytic);SUBCELLULAR LOCALIZATION	BIOGENESIS OF CELLULAR COMPONENTS	44	0	SUBCELLULAR LOCALIZATION	44	1
mc2002187	PROTEIN SYNTHESIS;PROTEIN WITH BINDING FUNCTION OR COFACTOR REQUIREMENT (structural or catalytic);SUBCELLULAR LOCALIZATION	CELL CYCLE AND DNA PROCESSING	44	0	PROTEIN WITH BINDING FUNCTION OR COFACTOR REQUIREMENT (structural or catalytic)	44	1
mc4001558	REGULATION OF METABOLISM AND PROTEIN FUNCTION;SUBCELLULAR LOCALIZATION	METABOLISM	44	0	REGULATION OF METABOLISM AND PROTEIN FUNCTION	44	1
mc8001619	CELLULAR COMMUNICATION/SIGNAL TRANSDUCTION MECHANISM;SYSTEMIC INTERACTION WITH THE ENVIRONMENT;SUBCELLULAR LOCALIZATION;ORGAN LOCALIZATION	PROTEIN WITH BINDING FUNCTION OR COFACTOR REQUIREMENT (structural or catalytic)	44	0	CELLULAR COMMUNICATION/SIGNAL TRANSDUCTION MECHANISM	44	1
mc8001665	SUBCELLULAR LOCALIZATION	CELL CYCLE AND DNA PROCESSING	44	0	SUBCELLULAR LOCALIZATION	44	1
mc11001271	CELL CYCLE AND DNA PROCESSING;PROTEIN WITH BINDING FUNCTION OR COFACTOR REQUIREMENT (structural or catalytic);REGULATION OF METABOLISM AND PROTEIN FUNCTION;CELLULAR COMMUNICATION/SIGNAL TRANSDUCTION MECHANISM;SUBCELLULAR LOCALIZATION	PROTEIN FATE (folding modification destination)	43	0	PROTEIN WITH BINDING FUNCTION OR COFACTOR REQUIREMENT (structural or catalytic)	43	1
mc11001938	CELLULAR COMMUNICATION/SIGNAL TRANSDUCTION MECHANISM;SUBCELLULAR LOCALIZATION	CELLULAR TRANSPORT TRANSPORT FACILITIES AND TRANSPORT ROUTES	43	0	CELLULAR COMMUNICATION/SIGNAL TRANSDUCTION MECHANISM	43	1
mc18000700	PROTEIN WITH BINDING FUNCTION OR COFACTOR REQUIREMENT (structural or catalytic);SUBCELLULAR LOCALIZATION	CELL FATE	43	0	SUBCELLULAR LOCALIZATION	43	1
mc2002400	SUBCELLULAR LOCALIZATION	PROTEIN WITH BINDING FUNCTION OR COFACTOR REQUIREMENT (structural or catalytic)	43	0	SUBCELLULAR LOCALIZATION	43	1
mc9000753	CELLULAR TRANSPORT TRANSPORT FACILITIES AND TRANSPORT ROUTES;BIOGENESIS OF CELLULAR COMPONENTS;SUBCELLULAR LOCALIZATION	PROTEIN FATE (folding modification destination)	43	0	CELLULAR TRANSPORT TRANSPORT FACILITIES AND TRANSPORT ROUTES	43	1
mc4002248	CELLULAR COMMUNICATION/SIGNAL TRANSDUCTION MECHANISM;CELL FATE;SUBCELLULAR LOCALIZATION	PROTEIN WITH BINDING FUNCTION OR COFACTOR REQUIREMENT (structural or catalytic)	42	0	CELLULAR COMMUNICATION/SIGNAL TRANSDUCTION MECHANISM	42	1
mc8001427	PROTEIN WITH BINDING FUNCTION OR COFACTOR REQUIREMENT (structural or catalytic);CELLULAR TRANSPORT TRANSPORT FACILITIES AND TRANSPORT ROUTES;INTERACTION WITH THE ENVIRONMENT;SUBCELLULAR LOCALIZATION;ORGAN LOCALIZATION	ENERGY	42	0	PROTEIN WITH BINDING FUNCTION OR COFACTOR REQUIREMENT (structural or catalytic)	42	1
mc9001323	SUBCELLULAR LOCALIZATION	BIOGENESIS OF CELLULAR COMPONENTS	42	0	SUBCELLULAR LOCALIZATION	42	1
mc1000158	TRANSCRIPTION;PROTEIN WITH BINDING FUNCTION OR COFACTOR REQUIREMENT (structural or catalytic);SUBCELLULAR LOCALIZATION	PROTEIN FATE (folding modification destination)	41	0	PROTEIN WITH BINDING FUNCTION OR COFACTOR REQUIREMENT (structural or catalytic)	41	1
mc10001425	PROTEIN WITH BINDING FUNCTION OR COFACTOR REQUIREMENT (structural or catalytic);CELLULAR COMMUNICATION/SIGNAL TRANSDUCTION MECHANISM;CELL FATE	PROTEIN FATE (folding modification destination)	40	0	PROTEIN WITH BINDING FUNCTION OR COFACTOR REQUIREMENT (structural or catalytic)	40	1
mc14001001	CELLULAR COMMUNICATION/SIGNAL TRANSDUCTION MECHANISM;INTERACTION WITH THE ENVIRONMENT;SUBCELLULAR LOCALIZATION	CELLULAR TRANSPORT TRANSPORT FACILITIES AND TRANSPORT ROUTES	40	0	CELLULAR COMMUNICATION/SIGNAL TRANSDUCTION MECHANISM	40	1
mc2003003	REGULATION OF METABOLISM AND PROTEIN FUNCTION;SYSTEMIC INTERACTION WITH THE ENVIRONMENT;SUBCELLULAR LOCALIZATION	PROTEIN FATE (folding modification destination)	38	0	REGULATION OF METABOLISM AND PROTEIN FUNCTION	38	1

## Sheet: interaction-based approach
mc	functions	1st prediction	1st score	1st flag	2nd prediction	2nd score	2nd flag
mc9001805	PROTEIN WITH BINDING FUNCTION OR COFACTOR REQUIREMENT (structural or catalytic)	METABOLISM	260947	0	PROTEIN WITH BINDING FUNCTION OR COFACTOR REQUIREMENT (structural or catalytic)	235870	1
mc9000968	METABOLISM	SUBCELLULAR LOCALIZATION	238612	0	METABOLISM	225250	1
mc8001599	PROTEIN FATE (folding modification destination)	PROTEIN WITH BINDING FUNCTION OR COFACTOR REQUIREMENT (structural or catalytic)	227614	0	PROTEIN FATE (folding modification destination)	223517	1
mc4002323	METABOLISM;ENERGY;PROTEIN WITH BINDING FUNCTION OR COFACTOR REQUIREMENT (structural or catalytic)	SUBCELLULAR LOCALIZATION	203247	0	PROTEIN WITH BINDING FUNCTION OR COFACTOR REQUIREMENT (structural or catalytic)	171355	1
mc2003333	CELLULAR COMMUNICATION/SIGNAL TRANSDUCTION MECHANISM;CELL FATE;SUBCELLULAR LOCALIZATION	PROTEIN WITH BINDING FUNCTION OR COFACTOR REQUIREMENT (structural or catalytic)	196652	0	SUBCELLULAR LOCALIZATION	183935	1
mc7000746	PROTEIN FATE (folding modification destination);PROTEIN WITH BINDING FUNCTION OR COFACTOR REQUIREMENT (structural or catalytic);REGULATION OF METABOLISM AND PROTEIN FUNCTION;INTERACTION WITH THE ENVIRONMENT;SYSTEMIC INTERACTION WITH THE ENVIRONMENT;SUBCELLULAR LOCALIZATION	CELLULAR COMMUNICATION/SIGNAL TRANSDUCTION MECHANISM	190991	0	PROTEIN WITH BINDING FUNCTION OR COFACTOR REQUIREMENT (structural or catalytic)	166559	1
mc14000386	CELL RESCUE DEFENSE AND VIRULENCE;INTERACTION WITH THE ENVIRONMENT;SUBCELLULAR LOCALIZATION	PROTEIN WITH BINDING FUNCTION OR COFACTOR REQUIREMENT (structural or catalytic)	188261	0	SUBCELLULAR LOCALIZATION	156393	1
mc5000521	DEVELOPMENT (Systemic);SUBCELLULAR LOCALIZATION	PROTEIN WITH BINDING FUNCTION OR COFACTOR REQUIREMENT (structural or catalytic)	179547	0	SUBCELLULAR LOCALIZATION	114927	1
mc11000946	SUBCELLULAR LOCALIZATION	PROTEIN WITH BINDING FUNCTION OR COFACTOR REQUIREMENT (structural or catalytic)	178562	0	SUBCELLULAR LOCALIZATION	170696	1
mc6001229	PROTEIN WITH BINDING FUNCTION OR COFACTOR REQUIREMENT (structural or catalytic)	SUBCELLULAR LOCALIZATION	171075	0	PROTEIN WITH BINDING FUNCTION OR COFACTOR REQUIREMENT (structural or catalytic)	149292	1
mc2002203	PROTEIN WITH BINDING FUNCTION OR COFACTOR REQUIREMENT (structural or catalytic);CELLULAR TRANSPORT TRANSPORT FACILITIES AND TRANSPORT ROUTES;CELL TYPE DIFFERENTIATION	SUBCELLULAR LOCALIZATION	165408	0	PROTEIN WITH BINDING FUNCTION OR COFACTOR REQUIREMENT (structural or catalytic)	131258	1
mc14000029	METABOLISM;CELL CYCLE AND DNA PROCESSING;PROTEIN WITH BINDING FUNCTION OR COFACTOR REQUIREMENT (structural or catalytic)	SUBCELLULAR LOCALIZATION	162329	0	PROTEIN WITH BINDING FUNCTION OR COFACTOR REQUIREMENT (structural or catalytic)	135063	1
mc4000403	TRANSCRIPTION;PROTEIN SYNTHESIS;PROTEIN WITH BINDING FUNCTION OR COFACTOR REQUIREMENT (structural or catalytic)	SUBCELLULAR LOCALIZATION	158748	0	PROTEIN WITH BINDING FUNCTION OR COFACTOR REQUIREMENT (structural or catalytic)	154736	1
mc18000454	SYSTEMIC INTERACTION WITH THE ENVIRONMENT;CELL FATE;CELL TYPE DIFFERENTIATION;SUBCELLULAR LOCALIZATION	PROTEIN WITH BINDING FUNCTION OR COFACTOR REQUIREMENT (structural or catalytic)	158135	0	SUBCELLULAR LOCALIZATION	144871	1
mc16000794	SUBCELLULAR LOCALIZATION	PROTEIN WITH BINDING FUNCTION OR COFACTOR REQUIREMENT (structural or catalytic)	157795	0	SUBCELLULAR LOCALIZATION	138352	1
mc5002094	METABOLISM;SUBCELLULAR LOCALIZATION	PROTEIN WITH BINDING FUNCTION OR COFACTOR REQUIREMENT (structural or catalytic)	155847	0	SUBCELLULAR LOCALIZATION	127087	1
mc4002507	PROTEIN FATE (folding modification destination);PROTEIN WITH BINDING FUNCTION OR COFACTOR REQUIREMENT (structural or catalytic);REGULATION OF METABOLISM AND PROTEIN FUNCTION;CELLULAR COMMUNICATION/SIGNAL TRANSDUCTION MECHANISM	SUBCELLULAR LOCALIZATION	155305	0	PROTEIN WITH BINDING FUNCTION OR COFACTOR REQUIREMENT (structural or catalytic)	145593	1
mc11000916	TRANSCRIPTION;SUBCELLULAR LOCALIZATION	PROTEIN WITH BINDING FUNCTION OR COFACTOR REQUIREMENT (structural or catalytic)	153912	0	SUBCELLULAR LOCALIZATION	135080	1
mc6000075	SUBCELLULAR LOCALIZATION	PROTEIN WITH BINDING FUNCTION OR COFACTOR REQUIREMENT (structural or catalytic)	149930	0	SUBCELLULAR LOCALIZATION	120580	1
mc11002035	PROTEIN WITH BINDING FUNCTION OR COFACTOR REQUIREMENT (structural or catalytic);DEVELOPMENT (Systemic);TISSUE DIFFERENTIATION;TISSUE LOCALIZATION	SUBCELLULAR LOCALIZATION	144878	0	PROTEIN WITH BINDING FUNCTION OR COFACTOR REQUIREMENT (structural or catalytic)	123831	1
mc1000034	CELL CYCLE AND DNA PROCESSING;TRANSCRIPTION;SUBCELLULAR LOCALIZATION	PROTEIN WITH BINDING FUNCTION OR COFACTOR REQUIREMENT (structural or catalytic)	143184	0	SUBCELLULAR LOCALIZATION	138816	1
mc6001134	PROTEIN WITH BINDING FUNCTION OR COFACTOR REQUIREMENT (structural or catalytic)	SUBCELLULAR LOCALIZATION	141760	0	PROTEIN WITH BINDING FUNCTION OR COFACTOR REQUIREMENT (structural or catalytic)	116400	1
mc16000831	CELLULAR COMMUNICATION/SIGNAL TRANSDUCTION MECHANISM;SUBCELLULAR LOCALIZATION	PROTEIN WITH BINDING FUNCTION OR COFACTOR REQUIREMENT (structural or catalytic)	140682	0	CELLULAR COMMUNICATION/SIGNAL TRANSDUCTION MECHANISM	110621	1
mc5001482	PROTEIN FATE (folding modification destination);SUBCELLULAR LOCALIZATION	PROTEIN WITH BINDING FUNCTION OR COFACTOR REQUIREMENT (structural or catalytic)	139986	0	SUBCELLULAR LOCALIZATION	132802	1
mc9001701	PROTEIN WITH BINDING FUNCTION OR COFACTOR REQUIREMENT (structural or catalytic)	SUBCELLULAR LOCALIZATION	139755	0	PROTEIN WITH BINDING FUNCTION OR COFACTOR REQUIREMENT (structural or catalytic)	119172	1
mc11002534	SUBCELLULAR LOCALIZATION	PROTEIN WITH BINDING FUNCTION OR COFACTOR REQUIREMENT (structural or catalytic)	138665	0	SUBCELLULAR LOCALIZATION	122559	1
mcx000694	METABOLISM;PROTEIN WITH BINDING FUNCTION OR COFACTOR REQUIREMENT (structural or catalytic)	SUBCELLULAR LOCALIZATION	137811	0	PROTEIN WITH BINDING FUNCTION OR COFACTOR REQUIREMENT (structural or catalytic)	110191	1
mc2000290	METABOLISM;INTERACTION WITH THE ENVIRONMENT	SUBCELLULAR LOCALIZATION	131694	0	METABOLISM	123743	1
mc11002343	SUBCELLULAR LOCALIZATION	PROTEIN WITH BINDING FUNCTION OR COFACTOR REQUIREMENT (structural or catalytic)	127874	0	SUBCELLULAR LOCALIZATION	105048	1
mc11001496	METABOLISM;TRANSCRIPTION;PROTEIN WITH BINDING FUNCTION OR COFACTOR REQUIREMENT (structural or catalytic)	SUBCELLULAR LOCALIZATION	123758	0	PROTEIN WITH BINDING FUNCTION OR COFACTOR REQUIREMENT (structural or catalytic)	122761	1
mc8000144	METABOLISM	SUBCELLULAR LOCALIZATION	123606	0	METABOLISM	120090	1
mc15001589	INTERACTION WITH THE ENVIRONMENT;SYSTEMIC INTERACTION WITH THE ENVIRONMENT;SUBCELLULAR LOCALIZATION;ORGAN LOCALIZATION	CELLULAR COMMUNICATION/SIGNAL TRANSDUCTION MECHANISM	122946	0	SUBCELLULAR LOCALIZATION	119453	1
mc7001471	CELL CYCLE AND DNA PROCESSING;SUBCELLULAR LOCALIZATION	PROTEIN WITH BINDING FUNCTION OR COFACTOR REQUIREMENT (structural or catalytic)	122528	0	SUBCELLULAR LOCALIZATION	113463	1
mc5001551	PROTEIN WITH BINDING FUNCTION OR COFACTOR REQUIREMENT (structural or catalytic);INTERACTION WITH THE ENVIRONMENT	SUBCELLULAR LOCALIZATION	121094	0	PROTEIN WITH BINDING FUNCTION OR COFACTOR REQUIREMENT (structural or catalytic)	118364	1
mc16000597	PROTEIN FATE (folding modification destination);PROTEIN WITH BINDING FUNCTION OR COFACTOR REQUIREMENT (structural or catalytic);INTERACTION WITH THE ENVIRONMENT	SUBCELLULAR LOCALIZATION	120651	0	PROTEIN WITH BINDING FUNCTION OR COFACTOR REQUIREMENT (structural or catalytic)	107069	1
mc4001794	METABOLISM;PROTEIN WITH BINDING FUNCTION OR COFACTOR REQUIREMENT (structural or catalytic)	SUBCELLULAR LOCALIZATION	115722	0	PROTEIN WITH BINDING FUNCTION OR COFACTOR REQUIREMENT (structural or catalytic)	106907	1
mc2002056	PROTEIN WITH BINDING FUNCTION OR COFACTOR REQUIREMENT (structural or catalytic)	SUBCELLULAR LOCALIZATION	114643	0	PROTEIN WITH BINDING FUNCTION OR COFACTOR REQUIREMENT (structural or catalytic)	81477	1
mc4001314	CELL CYCLE AND DNA PROCESSING;PROTEIN WITH BINDING FUNCTION OR COFACTOR REQUIREMENT (structural or catalytic);CELLULAR TRANSPORT TRANSPORT FACILITIES AND TRANSPORT ROUTES;DEVELOPMENT (Systemic)	SUBCELLULAR LOCALIZATION	113456	0	PROTEIN WITH BINDING FUNCTION OR COFACTOR REQUIREMENT (structural or catalytic)	109938	1
mc2001972	PROTEIN WITH BINDING FUNCTION OR COFACTOR REQUIREMENT (structural or catalytic);CELLULAR TRANSPORT TRANSPORT FACILITIES AND TRANSPORT ROUTES;CELL FATE	SUBCELLULAR LOCALIZATION	113112	0	PROTEIN WITH BINDING FUNCTION OR COFACTOR REQUIREMENT (structural or catalytic)	106279	1
mc10001432	METABOLISM;PROTEIN WITH BINDING FUNCTION OR COFACTOR REQUIREMENT (structural or catalytic)	SUBCELLULAR LOCALIZATION	112761	0	PROTEIN WITH BINDING FUNCTION OR COFACTOR REQUIREMENT (structural or catalytic)	82332	1
mc9000304	SUBCELLULAR LOCALIZATION	PROTEIN WITH BINDING FUNCTION OR COFACTOR REQUIREMENT (structural or catalytic)	112105	0	SUBCELLULAR LOCALIZATION	103623	1
mc2002827	PROTEIN WITH BINDING FUNCTION OR COFACTOR REQUIREMENT (structural or catalytic)	SUBCELLULAR LOCALIZATION	110638	0	PROTEIN WITH BINDING FUNCTION OR COFACTOR REQUIREMENT (structural or catalytic)	109608	1
mc2000107	PROTEIN SYNTHESIS;PROTEIN WITH BINDING FUNCTION OR COFACTOR REQUIREMENT (structural or catalytic)	SUBCELLULAR LOCALIZATION	110267	0	PROTEIN WITH BINDING FUNCTION OR COFACTOR REQUIREMENT (structural or catalytic)	106141	1
mc2002162	PROTEIN WITH BINDING FUNCTION OR COFACTOR REQUIREMENT (structural or catalytic)	SUBCELLULAR LOCALIZATION	109556	0	PROTEIN WITH BINDING FUNCTION OR COFACTOR REQUIREMENT (structural or catalytic)	97354	1
mc3001933	PROTEIN FATE (folding modification destination);PROTEIN WITH BINDING FUNCTION OR COFACTOR REQUIREMENT (structural or catalytic);REGULATION OF METABOLISM AND PROTEIN FUNCTION;CELLULAR COMMUNICATION/SIGNAL TRANSDUCTION MECHANISM	SUBCELLULAR LOCALIZATION	109172	0	PROTEIN WITH BINDING FUNCTION OR COFACTOR REQUIREMENT (structural or catalytic)	79862	1
mc5001403	PROTEIN WITH BINDING FUNCTION OR COFACTOR REQUIREMENT (structural or catalytic);CELLULAR COMMUNICATION/SIGNAL TRANSDUCTION MECHANISM;CELL FATE	SUBCELLULAR LOCALIZATION	108056	0	PROTEIN WITH BINDING FUNCTION OR COFACTOR REQUIREMENT (structural or catalytic)	83488	1
mc13000846	PROTEIN WITH BINDING FUNCTION OR COFACTOR REQUIREMENT (structural or catalytic);CELLULAR TRANSPORT TRANSPORT FACILITIES AND TRANSPORT ROUTES;BIOGENESIS OF CELLULAR COMPONENTS	SUBCELLULAR LOCALIZATION	107690	0	PROTEIN WITH BINDING FUNCTION OR COFACTOR REQUIREMENT (structural or catalytic)	85511	1
mc3000584	PROTEIN WITH BINDING FUNCTION OR COFACTOR REQUIREMENT (structural or catalytic)	SUBCELLULAR LOCALIZATION	105009	0	PROTEIN WITH BINDING FUNCTION OR COFACTOR REQUIREMENT (structural or catalytic)	89745	1
mc15001249	SYSTEMIC INTERACTION WITH THE ENVIRONMENT;SUBCELLULAR LOCALIZATION	CELLULAR COMMUNICATION/SIGNAL TRANSDUCTION MECHANISM	103929	0	SUBCELLULAR LOCALIZATION	97980	1
mc19001002	SUBCELLULAR LOCALIZATION	PROTEIN WITH BINDING FUNCTION OR COFACTOR REQUIREMENT (structural or catalytic)	103028	0	SUBCELLULAR LOCALIZATION	94086	1
mc13001351	PROTEIN FATE (folding modification destination);PROTEIN WITH BINDING FUNCTION OR COFACTOR REQUIREMENT (structural or catalytic);CELLULAR TRANSPORT TRANSPORT FACILITIES AND TRANSPORT ROUTES	SUBCELLULAR LOCALIZATION	100112	0	PROTEIN FATE (folding modification destination)	98065	1
mc10000142	ORGAN DIFFERENTIATION;SUBCELLULAR LOCALIZATION	PROTEIN WITH BINDING FUNCTION OR COFACTOR REQUIREMENT (structural or catalytic)	96121	0	SUBCELLULAR LOCALIZATION	92983	1
mc10000767	PROTEIN WITH BINDING FUNCTION OR COFACTOR REQUIREMENT (structural or catalytic)	SUBCELLULAR LOCALIZATION	95956	0	PROTEIN WITH BINDING FUNCTION OR COFACTOR REQUIREMENT (structural or catalytic)	64122	1
mc15001179	PROTEIN WITH BINDING FUNCTION OR COFACTOR REQUIREMENT (structural or catalytic)	SUBCELLULAR LOCALIZATION	94755	0	PROTEIN WITH BINDING FUNCTION OR COFACTOR REQUIREMENT (structural or catalytic)	84385	1
mc3000073	PROTEIN WITH BINDING FUNCTION OR COFACTOR REQUIREMENT (structural or catalytic)	SUBCELLULAR LOCALIZATION	93661	0	PROTEIN WITH BINDING FUNCTION OR COFACTOR REQUIREMENT (structural or catalytic)	74612	1
mc4000674	METABOLISM;PROTEIN WITH BINDING FUNCTION OR COFACTOR REQUIREMENT (structural or catalytic)	SUBCELLULAR LOCALIZATION	92649	0	PROTEIN WITH BINDING FUNCTION OR COFACTOR REQUIREMENT (structural or catalytic)	71985	1
mc9001186	TRANSCRIPTION;CELL FATE;SUBCELLULAR LOCALIZATION	PROTEIN WITH BINDING FUNCTION OR COFACTOR REQUIREMENT (structural or catalytic)	92637	0	SUBCELLULAR LOCALIZATION	85285	1
mc12000967	METABOLISM;PROTEIN WITH BINDING FUNCTION OR COFACTOR REQUIREMENT (structural or catalytic);CELLULAR TRANSPORT TRANSPORT FACILITIES AND TRANSPORT ROUTES	SUBCELLULAR LOCALIZATION	90963	0	PROTEIN WITH BINDING FUNCTION OR COFACTOR REQUIREMENT (structural or catalytic)	72997	1
mc7001428	PROTEIN FATE (folding modification destination);SUBCELLULAR LOCALIZATION	PROTEIN WITH BINDING FUNCTION OR COFACTOR REQUIREMENT (structural or catalytic)	87393	0	SUBCELLULAR LOCALIZATION	76111	1
mc15001007	SUBCELLULAR LOCALIZATION	PROTEIN WITH BINDING FUNCTION OR COFACTOR REQUIREMENT (structural or catalytic)	87206	0	SUBCELLULAR LOCALIZATION	85521	1
mc13001422	PROTEIN WITH BINDING FUNCTION OR COFACTOR REQUIREMENT (structural or catalytic);CELLULAR COMMUNICATION/SIGNAL TRANSDUCTION MECHANISM	SUBCELLULAR LOCALIZATION	84952	0	CELLULAR COMMUNICATION/SIGNAL TRANSDUCTION MECHANISM	75129	1
mc3000909	METABOLISM;PROTEIN WITH BINDING FUNCTION OR COFACTOR REQUIREMENT (structural or catalytic)	SUBCELLULAR LOCALIZATION	83830	0	PROTEIN WITH BINDING FUNCTION OR COFACTOR REQUIREMENT (structural or catalytic)	83387	1
mcx001705	CELL CYCLE AND DNA PROCESSING;CELL RESCUE DEFENSE AND VIRULENCE;SUBCELLULAR LOCALIZATION	PROTEIN WITH BINDING FUNCTION OR COFACTOR REQUIREMENT (structural or catalytic)	83099	0	SUBCELLULAR LOCALIZATION	66894	1
mc7000351	PROTEIN WITH BINDING FUNCTION OR COFACTOR REQUIREMENT (structural or catalytic);CELLULAR TRANSPORT TRANSPORT FACILITIES AND TRANSPORT ROUTES;BIOGENESIS OF CELLULAR COMPONENTS;CELL TYPE DIFFERENTIATION	SUBCELLULAR LOCALIZATION	81486	0	PROTEIN WITH BINDING FUNCTION OR COFACTOR REQUIREMENT (structural or catalytic)	61499	1
mc13001367	METABOLISM;PROTEIN WITH BINDING FUNCTION OR COFACTOR REQUIREMENT (structural or catalytic)	SUBCELLULAR LOCALIZATION	81027	0	PROTEIN WITH BINDING FUNCTION OR COFACTOR REQUIREMENT (structural or catalytic)	79032	1
mc5001915	METABOLISM;PROTEIN WITH BINDING FUNCTION OR COFACTOR REQUIREMENT (structural or catalytic)	SUBCELLULAR LOCALIZATION	79927	0	PROTEIN WITH BINDING FUNCTION OR COFACTOR REQUIREMENT (structural or catalytic)	72664	1
mc12000563	SUBCELLULAR LOCALIZATION	PROTEIN WITH BINDING FUNCTION OR COFACTOR REQUIREMENT (structural or catalytic)	79541	0	SUBCELLULAR LOCALIZATION	73105	1
mc14000634	PROTEIN WITH BINDING FUNCTION OR COFACTOR REQUIREMENT (structural or catalytic)	SUBCELLULAR LOCALIZATION	79295	0	PROTEIN WITH BINDING FUNCTION OR COFACTOR REQUIREMENT (structural or catalytic)	61372	1
mc13001611	PROTEIN WITH BINDING FUNCTION OR COFACTOR REQUIREMENT (structural or catalytic)	SUBCELLULAR LOCALIZATION	76620	0	PROTEIN WITH BINDING FUNCTION OR COFACTOR REQUIREMENT (structural or catalytic)	60580	1
mc9000883	METABOLISM;PROTEIN WITH BINDING FUNCTION OR COFACTOR REQUIREMENT (structural or catalytic)	SUBCELLULAR LOCALIZATION	75068	0	PROTEIN WITH BINDING FUNCTION OR COFACTOR REQUIREMENT (structural or catalytic)	73989	1
mc12000230	SUBCELLULAR LOCALIZATION	PROTEIN WITH BINDING FUNCTION OR COFACTOR REQUIREMENT (structural or catalytic)	74016	0	SUBCELLULAR LOCALIZATION	64380	1
mc9001523	METABOLISM;ENERGY;PROTEIN WITH BINDING FUNCTION OR COFACTOR REQUIREMENT (structural or catalytic)	SUBCELLULAR LOCALIZATION	73874	0	PROTEIN WITH BINDING FUNCTION OR COFACTOR REQUIREMENT (structural or catalytic)	63694	1
mc4001227	PROTEIN FATE (folding modification destination);PROTEIN WITH BINDING FUNCTION OR COFACTOR REQUIREMENT (structural or catalytic)	SUBCELLULAR LOCALIZATION	72532	0	PROTEIN WITH BINDING FUNCTION OR COFACTOR REQUIREMENT (structural or catalytic)	64987	1
mc8000350	CELLULAR TRANSPORT TRANSPORT FACILITIES AND TRANSPORT ROUTES;SUBCELLULAR LOCALIZATION	PROTEIN WITH BINDING FUNCTION OR COFACTOR REQUIREMENT (structural or catalytic)	71678	0	SUBCELLULAR LOCALIZATION	68154	1
mc10001206	SUBCELLULAR LOCALIZATION	PROTEIN WITH BINDING FUNCTION OR COFACTOR REQUIREMENT (structural or catalytic)	68924	0	SUBCELLULAR LOCALIZATION	60922	1
mc16001038	METABOLISM;ENERGY	SUBCELLULAR LOCALIZATION	68352	0	METABOLISM	52155	1
mc9000110	METABOLISM;CELL CYCLE AND DNA PROCESSING;PROTEIN WITH BINDING FUNCTION OR COFACTOR REQUIREMENT (structural or catalytic)	SUBCELLULAR LOCALIZATION	68025	0	PROTEIN WITH BINDING FUNCTION OR COFACTOR REQUIREMENT (structural or catalytic)	55288	1
mc5001787	METABOLISM;PROTEIN WITH BINDING FUNCTION OR COFACTOR REQUIREMENT (structural or catalytic)	SUBCELLULAR LOCALIZATION	67812	0	PROTEIN WITH BINDING FUNCTION OR COFACTOR REQUIREMENT (structural or catalytic)	63090	1
mc2002374	INTERACTION WITH THE ENVIRONMENT;SYSTEMIC INTERACTION WITH THE ENVIRONMENT;SUBCELLULAR LOCALIZATION	PROTEIN WITH BINDING FUNCTION OR COFACTOR REQUIREMENT (structural or catalytic)	67098	0	SUBCELLULAR LOCALIZATION	62125	1
mc13001360	PROTEIN WITH BINDING FUNCTION OR COFACTOR REQUIREMENT (structural or catalytic)	SUBCELLULAR LOCALIZATION	64619	0	PROTEIN WITH BINDING FUNCTION OR COFACTOR REQUIREMENT (structural or catalytic)	50631	1
mc9000131	TRANSCRIPTION;PROTEIN WITH BINDING FUNCTION OR COFACTOR REQUIREMENT (structural or catalytic)	SUBCELLULAR LOCALIZATION	61231	0	PROTEIN WITH BINDING FUNCTION OR COFACTOR REQUIREMENT (structural or catalytic)	60124	1
mc11000229	PROTEIN WITH BINDING FUNCTION OR COFACTOR REQUIREMENT (structural or catalytic)	SUBCELLULAR LOCALIZATION	60867	0	PROTEIN WITH BINDING FUNCTION OR COFACTOR REQUIREMENT (structural or catalytic)	58549	1
mc12000653	SUBCELLULAR LOCALIZATION	PROTEIN WITH BINDING FUNCTION OR COFACTOR REQUIREMENT (structural or catalytic)	58970	0	SUBCELLULAR LOCALIZATION	57353	1
mc6001316	CELLULAR COMMUNICATION/SIGNAL TRANSDUCTION MECHANISM	PROTEIN WITH BINDING FUNCTION OR COFACTOR REQUIREMENT (structural or catalytic)	58757	0	CELLULAR COMMUNICATION/SIGNAL TRANSDUCTION MECHANISM	56556	1
mc15000457	REGULATION OF METABOLISM AND PROTEIN FUNCTION;CELLULAR COMMUNICATION/SIGNAL TRANSDUCTION MECHANISM;CELL FATE;SUBCELLULAR LOCALIZATION	PROTEIN WITH BINDING FUNCTION OR COFACTOR REQUIREMENT (structural or catalytic)	58539	0	SUBCELLULAR LOCALIZATION	45583	1
mc8001313	PROTEIN WITH BINDING FUNCTION OR COFACTOR REQUIREMENT (structural or catalytic)	SUBCELLULAR LOCALIZATION	57868	0	PROTEIN WITH BINDING FUNCTION OR COFACTOR REQUIREMENT (structural or catalytic)	54596	1
mc6000275	METABOLISM;ENERGY;PROTEIN WITH BINDING FUNCTION OR COFACTOR REQUIREMENT (structural or catalytic);CELLULAR TRANSPORT TRANSPORT FACILITIES AND TRANSPORT ROUTES	SUBCELLULAR LOCALIZATION	57125	0	PROTEIN WITH BINDING FUNCTION OR COFACTOR REQUIREMENT (structural or catalytic)	38422	1
mc17000602	METABOLISM;CELL CYCLE AND DNA PROCESSING;PROTEIN WITH BINDING FUNCTION OR COFACTOR REQUIREMENT (structural or catalytic)	SUBCELLULAR LOCALIZATION	56487	0	PROTEIN WITH BINDING FUNCTION OR COFACTOR REQUIREMENT (structural or catalytic)	54652	1
mc11000819	PROTEIN WITH BINDING FUNCTION OR COFACTOR REQUIREMENT (structural or catalytic)	SUBCELLULAR LOCALIZATION	56055	0	PROTEIN WITH BINDING FUNCTION OR COFACTOR REQUIREMENT (structural or catalytic)	44732	1
mc7000958	METABOLISM;PROTEIN WITH BINDING FUNCTION OR COFACTOR REQUIREMENT (structural or catalytic);SUBCELLULAR LOCALIZATION	CELLULAR COMMUNICATION/SIGNAL TRANSDUCTION MECHANISM	54749	0	SUBCELLULAR LOCALIZATION	53154	1
mc5000131	SUBCELLULAR LOCALIZATION	PROTEIN WITH BINDING FUNCTION OR COFACTOR REQUIREMENT (structural or catalytic)	54684	0	SUBCELLULAR LOCALIZATION	36627	1
mc7000713	METABOLISM;ENERGY;CELL FATE;SUBCELLULAR LOCALIZATION	PROTEIN WITH BINDING FUNCTION OR COFACTOR REQUIREMENT (structural or catalytic)	53047	0	SUBCELLULAR LOCALIZATION	51441	1
mc3001582	CELLULAR TRANSPORT TRANSPORT FACILITIES AND TRANSPORT ROUTES;INTERACTION WITH THE ENVIRONMENT;SUBCELLULAR LOCALIZATION;ORGAN LOCALIZATION	PROTEIN WITH BINDING FUNCTION OR COFACTOR REQUIREMENT (structural or catalytic)	53005	0	SUBCELLULAR LOCALIZATION	51444	1
mc11001697	PROTEIN WITH BINDING FUNCTION OR COFACTOR REQUIREMENT (structural or catalytic)	SUBCELLULAR LOCALIZATION	52973	0	PROTEIN WITH BINDING FUNCTION OR COFACTOR REQUIREMENT (structural or catalytic)	50106	1
mc7000241	CELL CYCLE AND DNA PROCESSING;INTERACTION WITH THE ENVIRONMENT;SYSTEMIC INTERACTION WITH THE ENVIRONMENT;BIOGENESIS OF CELLULAR COMPONENTS;SUBCELLULAR LOCALIZATION;TISSUE LOCALIZATION	PROTEIN WITH BINDING FUNCTION OR COFACTOR REQUIREMENT (structural or catalytic)	52759	0	SUBCELLULAR LOCALIZATION	41425	1
mc12001194	METABOLISM;PROTEIN WITH BINDING FUNCTION OR COFACTOR REQUIREMENT (structural or catalytic)	SUBCELLULAR LOCALIZATION	52597	0	PROTEIN WITH BINDING FUNCTION OR COFACTOR REQUIREMENT (structural or catalytic)	50800	1
mc11000801	PROTEIN FATE (folding modification destination);PROTEIN WITH BINDING FUNCTION OR COFACTOR REQUIREMENT (structural or catalytic)	SUBCELLULAR LOCALIZATION	52503	0	PROTEIN WITH BINDING FUNCTION OR COFACTOR REQUIREMENT (structural or catalytic)	46091	1
mc2002683	PROTEIN WITH BINDING FUNCTION OR COFACTOR REQUIREMENT (structural or catalytic);REGULATION OF METABOLISM AND PROTEIN FUNCTION;INTERACTION WITH THE ENVIRONMENT;CELL TYPE LOCALIZATION	SUBCELLULAR LOCALIZATION	51150	0	PROTEIN WITH BINDING FUNCTION OR COFACTOR REQUIREMENT (structural or catalytic)	41355	1
mc15001464	SUBCELLULAR LOCALIZATION	PROTEIN WITH BINDING FUNCTION OR COFACTOR REQUIREMENT (structural or catalytic)	50978	0	SUBCELLULAR LOCALIZATION	50275	1
mc4002488	METABOLISM;PROTEIN WITH BINDING FUNCTION OR COFACTOR REQUIREMENT (structural or catalytic)	SUBCELLULAR LOCALIZATION	49670	0	METABOLISM	49112	1
mc10001111	SUBCELLULAR LOCALIZATION	PROTEIN WITH BINDING FUNCTION OR COFACTOR REQUIREMENT (structural or catalytic)	49521	0	SUBCELLULAR LOCALIZATION	46875	1
mc13000374	METABOLISM;CELLULAR COMMUNICATION/SIGNAL TRANSDUCTION MECHANISM;SUBCELLULAR LOCALIZATION	PROTEIN WITH BINDING FUNCTION OR COFACTOR REQUIREMENT (structural or catalytic)	49520	0	SUBCELLULAR LOCALIZATION	47877	1
mc2000881	PROTEIN WITH BINDING FUNCTION OR COFACTOR REQUIREMENT (structural or catalytic)	SUBCELLULAR LOCALIZATION	48505	0	PROTEIN WITH BINDING FUNCTION OR COFACTOR REQUIREMENT (structural or catalytic)	42607	1
mc7000516	METABOLISM;ENERGY;PROTEIN WITH BINDING FUNCTION OR COFACTOR REQUIREMENT (structural or catalytic);CELLULAR TRANSPORT TRANSPORT FACILITIES AND TRANSPORT ROUTES	SUBCELLULAR LOCALIZATION	48470	0	PROTEIN WITH BINDING FUNCTION OR COFACTOR REQUIREMENT (structural or catalytic)	40604	1
mc9000012	METABOLISM;PROTEIN WITH BINDING FUNCTION OR COFACTOR REQUIREMENT (structural or catalytic)	SUBCELLULAR LOCALIZATION	47695	0	PROTEIN WITH BINDING FUNCTION OR COFACTOR REQUIREMENT (structural or catalytic)	33115	1
mc14000322	PROTEIN WITH BINDING FUNCTION OR COFACTOR REQUIREMENT (structural or catalytic)	SUBCELLULAR LOCALIZATION	47114	0	PROTEIN WITH BINDING FUNCTION OR COFACTOR REQUIREMENT (structural or catalytic)	30805	1
mc8001942	PROTEIN WITH BINDING FUNCTION OR COFACTOR REQUIREMENT (structural or catalytic)	SUBCELLULAR LOCALIZATION	46575	0	PROTEIN WITH BINDING FUNCTION OR COFACTOR REQUIREMENT (structural or catalytic)	40552	1
mc13000870	TRANSCRIPTION;CELLULAR COMMUNICATION/SIGNAL TRANSDUCTION MECHANISM;SUBCELLULAR LOCALIZATION	PROTEIN WITH BINDING FUNCTION OR COFACTOR REQUIREMENT (structural or catalytic)	46168	0	SUBCELLULAR LOCALIZATION	42114	1
mc8000704	METABOLISM;PROTEIN WITH BINDING FUNCTION OR COFACTOR REQUIREMENT (structural or catalytic)	SUBCELLULAR LOCALIZATION	45035	0	PROTEIN WITH BINDING FUNCTION OR COFACTOR REQUIREMENT (structural or catalytic)	43544	1
mc2002668	METABOLISM	SUBCELLULAR LOCALIZATION	45032	0	METABOLISM	36922	1
mc1001307	SUBCELLULAR LOCALIZATION	PROTEIN WITH BINDING FUNCTION OR COFACTOR REQUIREMENT (structural or catalytic)	45003	0	SUBCELLULAR LOCALIZATION	41097	1
mc1001833	PROTEIN WITH BINDING FUNCTION OR COFACTOR REQUIREMENT (structural or catalytic)	SUBCELLULAR LOCALIZATION	44255	0	PROTEIN WITH BINDING FUNCTION OR COFACTOR REQUIREMENT (structural or catalytic)	33096	1
mc15000861	METABOLISM	SUBCELLULAR LOCALIZATION	43102	0	METABOLISM	32138	1
mc5000090	PROTEIN WITH BINDING FUNCTION OR COFACTOR REQUIREMENT (structural or catalytic)	SUBCELLULAR LOCALIZATION	43031	0	PROTEIN WITH BINDING FUNCTION OR COFACTOR REQUIREMENT (structural or catalytic)	40833	1
mc1002296	METABOLISM	SUBCELLULAR LOCALIZATION	41983	0	METABOLISM	39077	1
mc9001023	METABOLISM	PROTEIN WITH BINDING FUNCTION OR COFACTOR REQUIREMENT (structural or catalytic)	41594	0	METABOLISM	41171	1
mc2000748	BIOGENESIS OF CELLULAR COMPONENTS;SUBCELLULAR LOCALIZATION	PROTEIN WITH BINDING FUNCTION OR COFACTOR REQUIREMENT (structural or catalytic)	40678	0	SUBCELLULAR LOCALIZATION	35710	1
mc7002420	ENERGY;PROTEIN WITH BINDING FUNCTION OR COFACTOR REQUIREMENT (structural or catalytic);CELLULAR TRANSPORT TRANSPORT FACILITIES AND TRANSPORT ROUTES;CELLULAR COMMUNICATION/SIGNAL TRANSDUCTION MECHANISM	SUBCELLULAR LOCALIZATION	40347	0	PROTEIN WITH BINDING FUNCTION OR COFACTOR REQUIREMENT (structural or catalytic)	37467	1
mc5001745	SUBCELLULAR LOCALIZATION;CELL TYPE LOCALIZATION;TISSUE LOCALIZATION;ORGAN LOCALIZATION	PROTEIN WITH BINDING FUNCTION OR COFACTOR REQUIREMENT (structural or catalytic)	39846	0	SUBCELLULAR LOCALIZATION	36506	1
mcx000234	PROTEIN WITH BINDING FUNCTION OR COFACTOR REQUIREMENT (structural or catalytic);REGULATION OF METABOLISM AND PROTEIN FUNCTION;CELL RESCUE DEFENSE AND VIRULENCE;CELL FATE	SUBCELLULAR LOCALIZATION	39352	0	PROTEIN WITH BINDING FUNCTION OR COFACTOR REQUIREMENT (structural or catalytic)	33497	1
mc3001184	CELL TYPE DIFFERENTIATION;TISSUE DIFFERENTIATION;ORGAN DIFFERENTIATION;SUBCELLULAR LOCALIZATION	PROTEIN WITH BINDING FUNCTION OR COFACTOR REQUIREMENT (structural or catalytic)	38909	0	SUBCELLULAR LOCALIZATION	37193	1
mc14000519	METABOLISM;PROTEIN FATE (folding modification destination);SUBCELLULAR LOCALIZATION	PROTEIN WITH BINDING FUNCTION OR COFACTOR REQUIREMENT (structural or catalytic)	38767	0	SUBCELLULAR LOCALIZATION	31978	1
mc2002853	PROTEIN WITH BINDING FUNCTION OR COFACTOR REQUIREMENT (structural or catalytic)	SUBCELLULAR LOCALIZATION	38662	0	PROTEIN WITH BINDING FUNCTION OR COFACTOR REQUIREMENT (structural or catalytic)	35292	1
mc3002170	CELLULAR COMMUNICATION/SIGNAL TRANSDUCTION MECHANISM	PROTEIN WITH BINDING FUNCTION OR COFACTOR REQUIREMENT (structural or catalytic)	37854	0	CELLULAR COMMUNICATION/SIGNAL TRANSDUCTION MECHANISM	36342	1
mc3001283	PROTEIN WITH BINDING FUNCTION OR COFACTOR REQUIREMENT (structural or catalytic);REGULATION OF METABOLISM AND PROTEIN FUNCTION;CELLULAR TRANSPORT TRANSPORT FACILITIES AND TRANSPORT ROUTES	SUBCELLULAR LOCALIZATION	36572	0	PROTEIN WITH BINDING FUNCTION OR COFACTOR REQUIREMENT (structural or catalytic)	30369	1
mc8000559	PROTEIN FATE (folding modification destination);CELLULAR TRANSPORT TRANSPORT FACILITIES AND TRANSPORT ROUTES	SUBCELLULAR LOCALIZATION	36089	0	PROTEIN FATE (folding modification destination)	35425	1
mc2000342	SUBCELLULAR LOCALIZATION	PROTEIN WITH BINDING FUNCTION OR COFACTOR REQUIREMENT (structural or catalytic)	35835	0	SUBCELLULAR LOCALIZATION	29611	1
mc2003417	PROTEIN WITH BINDING FUNCTION OR COFACTOR REQUIREMENT (structural or catalytic)	SUBCELLULAR LOCALIZATION	35419	0	PROTEIN WITH BINDING FUNCTION OR COFACTOR REQUIREMENT (structural or catalytic)	33098	1
mc3000151	PROTEIN FATE (folding modification destination);PROTEIN WITH BINDING FUNCTION OR COFACTOR REQUIREMENT (structural or catalytic);CELLULAR TRANSPORT TRANSPORT FACILITIES AND TRANSPORT ROUTES;BIOGENESIS OF CELLULAR COMPONENTS;CELL TYPE DIFFERENTIATION	SUBCELLULAR LOCALIZATION	35265	0	PROTEIN WITH BINDING FUNCTION OR COFACTOR REQUIREMENT (structural or catalytic)	28840	1
mc1001626	METABOLISM;SUBCELLULAR LOCALIZATION	PROTEIN WITH BINDING FUNCTION OR COFACTOR REQUIREMENT (structural or catalytic)	35218	0	SUBCELLULAR LOCALIZATION	32323	1
mc11001728	SUBCELLULAR LOCALIZATION	PROTEIN WITH BINDING FUNCTION OR COFACTOR REQUIREMENT (structural or catalytic)	35175	0	SUBCELLULAR LOCALIZATION	35140	1
mc16000273	TRANSCRIPTION;SUBCELLULAR LOCALIZATION	PROTEIN WITH BINDING FUNCTION OR COFACTOR REQUIREMENT (structural or catalytic)	33938	0	SUBCELLULAR LOCALIZATION	28171	1
mc8000981	PROTEIN WITH BINDING FUNCTION OR COFACTOR REQUIREMENT (structural or catalytic)	SUBCELLULAR LOCALIZATION	33748	0	PROTEIN WITH BINDING FUNCTION OR COFACTOR REQUIREMENT (structural or catalytic)	32579	1
mc7001721	CELL CYCLE AND DNA PROCESSING;TRANSCRIPTION;CELL RESCUE DEFENSE AND VIRULENCE;SUBCELLULAR LOCALIZATION	PROTEIN WITH BINDING FUNCTION OR COFACTOR REQUIREMENT (structural or catalytic)	33450	0	SUBCELLULAR LOCALIZATION	30609	1
mc1001363	SUBCELLULAR LOCALIZATION	PROTEIN WITH BINDING FUNCTION OR COFACTOR REQUIREMENT (structural or catalytic)	32808	0	SUBCELLULAR LOCALIZATION	32487	1
mc7002452	PROTEIN WITH BINDING FUNCTION OR COFACTOR REQUIREMENT (structural or catalytic);CELLULAR COMMUNICATION/SIGNAL TRANSDUCTION MECHANISM	SUBCELLULAR LOCALIZATION	31214	0	PROTEIN WITH BINDING FUNCTION OR COFACTOR REQUIREMENT (structural or catalytic)	22103	1
mc12000266	PROTEIN WITH BINDING FUNCTION OR COFACTOR REQUIREMENT (structural or catalytic)	SUBCELLULAR LOCALIZATION	30890	0	PROTEIN WITH BINDING FUNCTION OR COFACTOR REQUIREMENT (structural or catalytic)	24779	1
mc13000990	CELL CYCLE AND DNA PROCESSING;PROTEIN WITH BINDING FUNCTION OR COFACTOR REQUIREMENT (structural or catalytic);CELL FATE	SUBCELLULAR LOCALIZATION	30842	0	PROTEIN WITH BINDING FUNCTION OR COFACTOR REQUIREMENT (structural or catalytic)	22186	1
mc19000713	METABOLISM;SUBCELLULAR LOCALIZATION	PROTEIN WITH BINDING FUNCTION OR COFACTOR REQUIREMENT (structural or catalytic)	30803	0	METABOLISM	23550	1
mc19000908	SUBCELLULAR LOCALIZATION	PROTEIN WITH BINDING FUNCTION OR COFACTOR REQUIREMENT (structural or catalytic)	30344	0	SUBCELLULAR LOCALIZATION	29325	1
mc9001861	ENERGY;PROTEIN WITH BINDING FUNCTION OR COFACTOR REQUIREMENT (structural or catalytic);CELLULAR TRANSPORT TRANSPORT FACILITIES AND TRANSPORT ROUTES	SUBCELLULAR LOCALIZATION	30159	0	PROTEIN WITH BINDING FUNCTION OR COFACTOR REQUIREMENT (structural or catalytic)	26811	1
mc7002436	CELLULAR COMMUNICATION/SIGNAL TRANSDUCTION MECHANISM;SYSTEMIC INTERACTION WITH THE ENVIRONMENT;SUBCELLULAR LOCALIZATION	PROTEIN WITH BINDING FUNCTION OR COFACTOR REQUIREMENT (structural or catalytic)	29624	0	SUBCELLULAR LOCALIZATION	29219	1
mc19000119	TRANSCRIPTION;SYSTEMIC INTERACTION WITH THE ENVIRONMENT;CELL TYPE DIFFERENTIATION;SUBCELLULAR LOCALIZATION	PROTEIN WITH BINDING FUNCTION OR COFACTOR REQUIREMENT (structural or catalytic)	29431	0	SUBCELLULAR LOCALIZATION	24982	1
mc9000259	METABOLISM;TRANSCRIPTION;PROTEIN WITH BINDING FUNCTION OR COFACTOR REQUIREMENT (structural or catalytic)	SUBCELLULAR LOCALIZATION	29053	0	PROTEIN WITH BINDING FUNCTION OR COFACTOR REQUIREMENT (structural or catalytic)	26086	1
mc2002554	SUBCELLULAR LOCALIZATION	PROTEIN WITH BINDING FUNCTION OR COFACTOR REQUIREMENT (structural or catalytic)	28640	0	SUBCELLULAR LOCALIZATION	26418	1
mc7000234	PROTEIN WITH BINDING FUNCTION OR COFACTOR REQUIREMENT (structural or catalytic);INTERACTION WITH THE ENVIRONMENT	SUBCELLULAR LOCALIZATION	28557	0	PROTEIN WITH BINDING FUNCTION OR COFACTOR REQUIREMENT (structural or catalytic)	26368	1
mc4001915	CELL CYCLE AND DNA PROCESSING;PROTEIN WITH BINDING FUNCTION OR COFACTOR REQUIREMENT (structural or catalytic)	SUBCELLULAR LOCALIZATION	28336	0	PROTEIN WITH BINDING FUNCTION OR COFACTOR REQUIREMENT (structural or catalytic)	23590	1
mc17001130	PROTEIN WITH BINDING FUNCTION OR COFACTOR REQUIREMENT (structural or catalytic);CELL FATE;DEVELOPMENT (Systemic)	SUBCELLULAR LOCALIZATION	28152	0	PROTEIN WITH BINDING FUNCTION OR COFACTOR REQUIREMENT (structural or catalytic)	24608	1
mc4000822	SUBCELLULAR LOCALIZATION	PROTEIN WITH BINDING FUNCTION OR COFACTOR REQUIREMENT (structural or catalytic)	27984	0	SUBCELLULAR LOCALIZATION	26180	1
mc2002383	PROTEIN WITH BINDING FUNCTION OR COFACTOR REQUIREMENT (structural or catalytic);INTERACTION WITH THE ENVIRONMENT	SUBCELLULAR LOCALIZATION	27524	0	PROTEIN WITH BINDING FUNCTION OR COFACTOR REQUIREMENT (structural or catalytic)	23985	1
mc3001849	METABOLISM;PROTEIN WITH BINDING FUNCTION OR COFACTOR REQUIREMENT (structural or catalytic)	SUBCELLULAR LOCALIZATION	27159	0	METABOLISM	26535	1
mcx000668	PROTEIN WITH BINDING FUNCTION OR COFACTOR REQUIREMENT (structural or catalytic)	SUBCELLULAR LOCALIZATION	27094	0	PROTEIN WITH BINDING FUNCTION OR COFACTOR REQUIREMENT (structural or catalytic)	22866	1
mc17001119	PROTEIN WITH BINDING FUNCTION OR COFACTOR REQUIREMENT (structural or catalytic);INTERACTION WITH THE ENVIRONMENT	SUBCELLULAR LOCALIZATION	26902	0	PROTEIN WITH BINDING FUNCTION OR COFACTOR REQUIREMENT (structural or catalytic)	26202	1
mc6000770	REGULATION OF METABOLISM AND PROTEIN FUNCTION;SUBCELLULAR LOCALIZATION	PROTEIN WITH BINDING FUNCTION OR COFACTOR REQUIREMENT (structural or catalytic)	26411	0	SUBCELLULAR LOCALIZATION	21830	1
mc17000169	SUBCELLULAR LOCALIZATION	PROTEIN WITH BINDING FUNCTION OR COFACTOR REQUIREMENT (structural or catalytic)	26193	0	SUBCELLULAR LOCALIZATION	21711	1
mc4001344	PROTEIN WITH BINDING FUNCTION OR COFACTOR REQUIREMENT (structural or catalytic)	METABOLISM	25751	0	PROTEIN WITH BINDING FUNCTION OR COFACTOR REQUIREMENT (structural or catalytic)	22127	1
mc7002490	METABOLISM;INTERACTION WITH THE ENVIRONMENT	SUBCELLULAR LOCALIZATION	25545	0	METABOLISM	23881	1
mc6001161	PROTEIN WITH BINDING FUNCTION OR COFACTOR REQUIREMENT (structural or catalytic)	SUBCELLULAR LOCALIZATION	25387	0	PROTEIN WITH BINDING FUNCTION OR COFACTOR REQUIREMENT (structural or catalytic)	18960	1
mc9001222	PROTEIN FATE (folding modification destination);CELL RESCUE DEFENSE AND VIRULENCE;SUBCELLULAR LOCALIZATION	PROTEIN WITH BINDING FUNCTION OR COFACTOR REQUIREMENT (structural or catalytic)	25356	0	SUBCELLULAR LOCALIZATION	21455	1
mc10000564	CELL FATE;SUBCELLULAR LOCALIZATION	PROTEIN WITH BINDING FUNCTION OR COFACTOR REQUIREMENT (structural or catalytic)	24959	0	SUBCELLULAR LOCALIZATION	22712	1
mc4000473	METABOLISM;ENERGY;PROTEIN FATE (folding modification destination);PROTEIN WITH BINDING FUNCTION OR COFACTOR REQUIREMENT (structural or catalytic)	SUBCELLULAR LOCALIZATION	24739	0	PROTEIN WITH BINDING FUNCTION OR COFACTOR REQUIREMENT (structural or catalytic)	22877	1
mc8001259	PROTEIN WITH BINDING FUNCTION OR COFACTOR REQUIREMENT (structural or catalytic);CELLULAR TRANSPORT TRANSPORT FACILITIES AND TRANSPORT ROUTES;CELL RESCUE DEFENSE AND VIRULENCE	SUBCELLULAR LOCALIZATION	24022	0	PROTEIN WITH BINDING FUNCTION OR COFACTOR REQUIREMENT (structural or catalytic)	22708	1
mc4001421	PROTEIN WITH BINDING FUNCTION OR COFACTOR REQUIREMENT (structural or catalytic)	SUBCELLULAR LOCALIZATION	23878	0	PROTEIN WITH BINDING FUNCTION OR COFACTOR REQUIREMENT (structural or catalytic)	23609	1
mc16000679	METABOLISM;PROTEIN WITH BINDING FUNCTION OR COFACTOR REQUIREMENT (structural or catalytic)	SUBCELLULAR LOCALIZATION	23565	0	PROTEIN WITH BINDING FUNCTION OR COFACTOR REQUIREMENT (structural or catalytic)	22778	1
mc9001845	SUBCELLULAR LOCALIZATION	PROTEIN WITH BINDING FUNCTION OR COFACTOR REQUIREMENT (structural or catalytic)	23003	0	SUBCELLULAR LOCALIZATION	22647	1
mc13001032	CELL CYCLE AND DNA PROCESSING;SUBCELLULAR LOCALIZATION	PROTEIN WITH BINDING FUNCTION OR COFACTOR REQUIREMENT (structural or catalytic)	22922	0	SUBCELLULAR LOCALIZATION	21857	1
mc6001567	PROTEIN FATE (folding modification destination);PROTEIN WITH BINDING FUNCTION OR COFACTOR REQUIREMENT (structural or catalytic)	SUBCELLULAR LOCALIZATION	22895	0	PROTEIN WITH BINDING FUNCTION OR COFACTOR REQUIREMENT (structural or catalytic)	22446	1
mc12000385	METABOLISM	PROTEIN WITH BINDING FUNCTION OR COFACTOR REQUIREMENT (structural or catalytic)	22671	0	METABOLISM	17645	1
mc5000094	PROTEIN WITH BINDING FUNCTION OR COFACTOR REQUIREMENT (structural or catalytic)	SUBCELLULAR LOCALIZATION	22273	0	PROTEIN WITH BINDING FUNCTION OR COFACTOR REQUIREMENT (structural or catalytic)	20029	1
mc2001785	SUBCELLULAR LOCALIZATION	PROTEIN WITH BINDING FUNCTION OR COFACTOR REQUIREMENT (structural or catalytic)	22132	0	SUBCELLULAR LOCALIZATION	21814	1
mc15001121	PROTEIN WITH BINDING FUNCTION OR COFACTOR REQUIREMENT (structural or catalytic)	SUBCELLULAR LOCALIZATION	21791	0	PROTEIN WITH BINDING FUNCTION OR COFACTOR REQUIREMENT (structural or catalytic)	18163	1
mc15000114	METABOLISM;CELL CYCLE AND DNA PROCESSING;SUBCELLULAR LOCALIZATION	PROTEIN WITH BINDING FUNCTION OR COFACTOR REQUIREMENT (structural or catalytic)	21650	0	SUBCELLULAR LOCALIZATION	19030	1
mc19000976	TRANSCRIPTION;PROTEIN FATE (folding modification destination);SUBCELLULAR LOCALIZATION	PROTEIN WITH BINDING FUNCTION OR COFACTOR REQUIREMENT (structural or catalytic)	21574	0	SUBCELLULAR LOCALIZATION	21523	1
mc1001322	CELL CYCLE AND DNA PROCESSING;PROTEIN WITH BINDING FUNCTION OR COFACTOR REQUIREMENT (structural or catalytic)	SUBCELLULAR LOCALIZATION	21462	0	PROTEIN WITH BINDING FUNCTION OR COFACTOR REQUIREMENT (structural or catalytic)	10219	1
mc19001027	CELL CYCLE AND DNA PROCESSING;PROTEIN WITH BINDING FUNCTION OR COFACTOR REQUIREMENT (structural or catalytic)	SUBCELLULAR LOCALIZATION	20667	0	PROTEIN WITH BINDING FUNCTION OR COFACTOR REQUIREMENT (structural or catalytic)	20333	1
mc14001530	SUBCELLULAR LOCALIZATION	PROTEIN WITH BINDING FUNCTION OR COFACTOR REQUIREMENT (structural or catalytic)	20651	0	SUBCELLULAR LOCALIZATION	16794	1
mc1002020	PROTEIN WITH BINDING FUNCTION OR COFACTOR REQUIREMENT (structural or catalytic);INTERACTION WITH THE ENVIRONMENT;SYSTEMIC INTERACTION WITH THE ENVIRONMENT	SUBCELLULAR LOCALIZATION	20627	0	PROTEIN WITH BINDING FUNCTION OR COFACTOR REQUIREMENT (structural or catalytic)	19314	1
mc9000734	PROTEIN SYNTHESIS;PROTEIN WITH BINDING FUNCTION OR COFACTOR REQUIREMENT (structural or catalytic)	SUBCELLULAR LOCALIZATION	20038	0	PROTEIN WITH BINDING FUNCTION OR COFACTOR REQUIREMENT (structural or catalytic)	18877	1
mc2003399	BIOGENESIS OF CELLULAR COMPONENTS;SUBCELLULAR LOCALIZATION	PROTEIN WITH BINDING FUNCTION OR COFACTOR REQUIREMENT (structural or catalytic)	19898	0	SUBCELLULAR LOCALIZATION	16976	1
mc2003319	PROTEIN WITH BINDING FUNCTION OR COFACTOR REQUIREMENT (structural or catalytic);INTERACTION WITH THE ENVIRONMENT	SUBCELLULAR LOCALIZATION	19852	0	PROTEIN WITH BINDING FUNCTION OR COFACTOR REQUIREMENT (structural or catalytic)	15756	1
mc2003042	SUBCELLULAR LOCALIZATION	PROTEIN WITH BINDING FUNCTION OR COFACTOR REQUIREMENT (structural or catalytic)	19639	0	SUBCELLULAR LOCALIZATION	18781	1
mc5000510	PROTEIN WITH BINDING FUNCTION OR COFACTOR REQUIREMENT (structural or catalytic)	SUBCELLULAR LOCALIZATION	19295	0	PROTEIN WITH BINDING FUNCTION OR COFACTOR REQUIREMENT (structural or catalytic)	15564	1
mc17000890	PROTEIN WITH BINDING FUNCTION OR COFACTOR REQUIREMENT (structural or catalytic);REGULATION OF METABOLISM AND PROTEIN FUNCTION	SUBCELLULAR LOCALIZATION	19103	0	PROTEIN WITH BINDING FUNCTION OR COFACTOR REQUIREMENT (structural or catalytic)	17279	1
mc6001670	TRANSCRIPTION;SUBCELLULAR LOCALIZATION	PROTEIN WITH BINDING FUNCTION OR COFACTOR REQUIREMENT (structural or catalytic)	19068	0	SUBCELLULAR LOCALIZATION	15082	1
mc6001188	METABOLISM;PROTEIN WITH BINDING FUNCTION OR COFACTOR REQUIREMENT (structural or catalytic)	SUBCELLULAR LOCALIZATION	19066	0	METABOLISM	17481	1
mc10000508	METABOLISM;PROTEIN WITH BINDING FUNCTION OR COFACTOR REQUIREMENT (structural or catalytic)	SUBCELLULAR LOCALIZATION	18891	0	PROTEIN WITH BINDING FUNCTION OR COFACTOR REQUIREMENT (structural or catalytic)	16954	1
mc10001735	CELL CYCLE AND DNA PROCESSING;TRANSCRIPTION;PROTEIN WITH BINDING FUNCTION OR COFACTOR REQUIREMENT (structural or catalytic)	SUBCELLULAR LOCALIZATION	18559	0	PROTEIN WITH BINDING FUNCTION OR COFACTOR REQUIREMENT (structural or catalytic)	17162	1
mc3002251	SUBCELLULAR LOCALIZATION	PROTEIN WITH BINDING FUNCTION OR COFACTOR REQUIREMENT (structural or catalytic)	18458	0	SUBCELLULAR LOCALIZATION	12759	1
mc7001756	METABOLISM;PROTEIN FATE (folding modification destination)	SUBCELLULAR LOCALIZATION	18251	0	METABOLISM	17427	1
mc6001065	SYSTEMIC INTERACTION WITH THE ENVIRONMENT;CELL FATE;SUBCELLULAR LOCALIZATION	PROTEIN WITH BINDING FUNCTION OR COFACTOR REQUIREMENT (structural or catalytic)	18249	0	SUBCELLULAR LOCALIZATION	14902	1
mc17001632	METABOLISM	SUBCELLULAR LOCALIZATION	17786	0	METABOLISM	15396	1
mc5000614	METABOLISM;PROTEIN WITH BINDING FUNCTION OR COFACTOR REQUIREMENT (structural or catalytic)	SUBCELLULAR LOCALIZATION	16951	0	PROTEIN WITH BINDING FUNCTION OR COFACTOR REQUIREMENT (structural or catalytic)	15698	1
mc18001395	ENERGY;PROTEIN FATE (folding modification destination);CELLULAR TRANSPORT TRANSPORT FACILITIES AND TRANSPORT ROUTES;SUBCELLULAR LOCALIZATION	PROTEIN WITH BINDING FUNCTION OR COFACTOR REQUIREMENT (structural or catalytic)	16687	0	SUBCELLULAR LOCALIZATION	13269	1
mc9001078	METABOLISM;ENERGY;PROTEIN WITH BINDING FUNCTION OR COFACTOR REQUIREMENT (structural or catalytic)	SUBCELLULAR LOCALIZATION	16623	0	PROTEIN WITH BINDING FUNCTION OR COFACTOR REQUIREMENT (structural or catalytic)	13366	1
mc7002924	METABOLISM	SUBCELLULAR LOCALIZATION	16529	0	METABOLISM	15773	1
mc15001118	CELLULAR COMMUNICATION/SIGNAL TRANSDUCTION MECHANISM;SYSTEMIC INTERACTION WITH THE ENVIRONMENT;CELL TYPE DIFFERENTIATION;SUBCELLULAR LOCALIZATION	PROTEIN WITH BINDING FUNCTION OR COFACTOR REQUIREMENT (structural or catalytic)	16294	0	SUBCELLULAR LOCALIZATION	16163	1
mc6002307	METABOLISM;SUBCELLULAR LOCALIZATION	PROTEIN WITH BINDING FUNCTION OR COFACTOR REQUIREMENT (structural or catalytic)	16250	0	SUBCELLULAR LOCALIZATION	10700	1
mc8000603	SYSTEMIC INTERACTION WITH THE ENVIRONMENT;SUBCELLULAR LOCALIZATION	PROTEIN WITH BINDING FUNCTION OR COFACTOR REQUIREMENT (structural or catalytic)	16060	0	SUBCELLULAR LOCALIZATION	15136	1
mc3001177	PROTEIN WITH BINDING FUNCTION OR COFACTOR REQUIREMENT (structural or catalytic);TISSUE DIFFERENTIATION	SUBCELLULAR LOCALIZATION	15935	0	PROTEIN WITH BINDING FUNCTION OR COFACTOR REQUIREMENT (structural or catalytic)	15347	1
mc7002484	PROTEIN WITH BINDING FUNCTION OR COFACTOR REQUIREMENT (structural or catalytic)	SUBCELLULAR LOCALIZATION	15926	0	PROTEIN WITH BINDING FUNCTION OR COFACTOR REQUIREMENT (structural or catalytic)	12589	1
mc13000016	PROTEIN WITH BINDING FUNCTION OR COFACTOR REQUIREMENT (structural or catalytic);CELLULAR COMMUNICATION/SIGNAL TRANSDUCTION MECHANISM	SUBCELLULAR LOCALIZATION	15907	0	CELLULAR COMMUNICATION/SIGNAL TRANSDUCTION MECHANISM	14702	1
mc17001541	TRANSCRIPTION;SUBCELLULAR LOCALIZATION	PROTEIN WITH BINDING FUNCTION OR COFACTOR REQUIREMENT (structural or catalytic)	15850	0	SUBCELLULAR LOCALIZATION	10621	1
mc11001021	PROTEIN WITH BINDING FUNCTION OR COFACTOR REQUIREMENT (structural or catalytic)	SUBCELLULAR LOCALIZATION	15572	0	PROTEIN WITH BINDING FUNCTION OR COFACTOR REQUIREMENT (structural or catalytic)	13978	1
mc3002060	PROTEIN WITH BINDING FUNCTION OR COFACTOR REQUIREMENT (structural or catalytic);INTERACTION WITH THE ENVIRONMENT	SUBCELLULAR LOCALIZATION	15523	0	PROTEIN WITH BINDING FUNCTION OR COFACTOR REQUIREMENT (structural or catalytic)	12476	1
mc19000928	METABOLISM;PROTEIN WITH BINDING FUNCTION OR COFACTOR REQUIREMENT (structural or catalytic);CELL RESCUE DEFENSE AND VIRULENCE;INTERACTION WITH THE ENVIRONMENT	SUBCELLULAR LOCALIZATION	15166	0	PROTEIN WITH BINDING FUNCTION OR COFACTOR REQUIREMENT (structural or catalytic)	14487	1
mc5002327	PROTEIN SYNTHESIS	SUBCELLULAR LOCALIZATION	14896	0	PROTEIN SYNTHESIS	13272	1
mc11002207	PROTEIN WITH BINDING FUNCTION OR COFACTOR REQUIREMENT (structural or catalytic)	SUBCELLULAR LOCALIZATION	14591	0	PROTEIN WITH BINDING FUNCTION OR COFACTOR REQUIREMENT (structural or catalytic)	14303	1
mc1002142	METABOLISM;CELLULAR COMMUNICATION/SIGNAL TRANSDUCTION MECHANISM;SUBCELLULAR LOCALIZATION	PROTEIN WITH BINDING FUNCTION OR COFACTOR REQUIREMENT (structural or catalytic)	14380	0	SUBCELLULAR LOCALIZATION	12204	1
mc6001057	METABOLISM;PROTEIN FATE (folding modification destination);PROTEIN WITH BINDING FUNCTION OR COFACTOR REQUIREMENT (structural or catalytic)	SUBCELLULAR LOCALIZATION	14030	0	PROTEIN WITH BINDING FUNCTION OR COFACTOR REQUIREMENT (structural or catalytic)	12952	1
mc18000801	SUBCELLULAR LOCALIZATION	PROTEIN WITH BINDING FUNCTION OR COFACTOR REQUIREMENT (structural or catalytic)	13615	0	SUBCELLULAR LOCALIZATION	8770	1
mc1000531	PROTEIN WITH BINDING FUNCTION OR COFACTOR REQUIREMENT (structural or catalytic);CELLULAR TRANSPORT TRANSPORT FACILITIES AND TRANSPORT ROUTES	SUBCELLULAR LOCALIZATION	13602	0	PROTEIN WITH BINDING FUNCTION OR COFACTOR REQUIREMENT (structural or catalytic)	12418	1
mc5000509	PROTEIN WITH BINDING FUNCTION OR COFACTOR REQUIREMENT (structural or catalytic);CELLULAR TRANSPORT TRANSPORT FACILITIES AND TRANSPORT ROUTES;BIOGENESIS OF CELLULAR COMPONENTS;CELL TYPE DIFFERENTIATION	SUBCELLULAR LOCALIZATION	13446	0	PROTEIN WITH BINDING FUNCTION OR COFACTOR REQUIREMENT (structural or catalytic)	8161	1
mc6001891	PROTEIN WITH BINDING FUNCTION OR COFACTOR REQUIREMENT (structural or catalytic);REGULATION OF METABOLISM AND PROTEIN FUNCTION;DEVELOPMENT (Systemic);CELL TYPE DIFFERENTIATION	SUBCELLULAR LOCALIZATION	13440	0	PROTEIN WITH BINDING FUNCTION OR COFACTOR REQUIREMENT (structural or catalytic)	13091	1
mc15001191	TRANSCRIPTION;PROTEIN SYNTHESIS;SUBCELLULAR LOCALIZATION	PROTEIN WITH BINDING FUNCTION OR COFACTOR REQUIREMENT (structural or catalytic)	13337	0	SUBCELLULAR LOCALIZATION	12919	1
mc2002263	CELL CYCLE AND DNA PROCESSING;BIOGENESIS OF CELLULAR COMPONENTS;SUBCELLULAR LOCALIZATION	PROTEIN WITH BINDING FUNCTION OR COFACTOR REQUIREMENT (structural or catalytic)	13319	0	SUBCELLULAR LOCALIZATION	13176	1
mc5000368	METABOLISM	SUBCELLULAR LOCALIZATION	13209	0	METABOLISM	8467	1
mc9000749	METABOLISM;CELL RESCUE DEFENSE AND VIRULENCE;SUBCELLULAR LOCALIZATION	PROTEIN WITH BINDING FUNCTION OR COFACTOR REQUIREMENT (structural or catalytic)	13075	0	SUBCELLULAR LOCALIZATION	10062	1
mc14000791	METABOLISM;PROTEIN FATE (folding modification destination);PROTEIN WITH BINDING FUNCTION OR COFACTOR REQUIREMENT (structural or catalytic);REGULATION OF METABOLISM AND PROTEIN FUNCTION;CELLULAR COMMUNICATION/SIGNAL TRANSDUCTION MECHANISM	SUBCELLULAR LOCALIZATION	13053	0	PROTEIN WITH BINDING FUNCTION OR COFACTOR REQUIREMENT (structural or catalytic)	12544	1
mc2002557	METABOLISM;PROTEIN SYNTHESIS;SUBCELLULAR LOCALIZATION	PROTEIN WITH BINDING FUNCTION OR COFACTOR REQUIREMENT (structural or catalytic)	12726	0	SUBCELLULAR LOCALIZATION	11540	1
mc12000983	SUBCELLULAR LOCALIZATION	PROTEIN WITH BINDING FUNCTION OR COFACTOR REQUIREMENT (structural or catalytic)	12672	0	SUBCELLULAR LOCALIZATION	12047	1
mc19000919	PROTEIN WITH BINDING FUNCTION OR COFACTOR REQUIREMENT (structural or catalytic)	SUBCELLULAR LOCALIZATION	12288	0	PROTEIN WITH BINDING FUNCTION OR COFACTOR REQUIREMENT (structural or catalytic)	12075	1
mc11002764	SUBCELLULAR LOCALIZATION	PROTEIN WITH BINDING FUNCTION OR COFACTOR REQUIREMENT (structural or catalytic)	12271	0	SUBCELLULAR LOCALIZATION	11303	1
mc12001463	METABOLISM;PROTEIN WITH BINDING FUNCTION OR COFACTOR REQUIREMENT (structural or catalytic)	SUBCELLULAR LOCALIZATION	11485	0	PROTEIN WITH BINDING FUNCTION OR COFACTOR REQUIREMENT (structural or catalytic)	10506	1
mc8000054	PROTEIN WITH BINDING FUNCTION OR COFACTOR REQUIREMENT (structural or catalytic)	SUBCELLULAR LOCALIZATION	10163	0	PROTEIN WITH BINDING FUNCTION OR COFACTOR REQUIREMENT (structural or catalytic)	5591	1
mc17000616	METABOLISM;PROTEIN WITH BINDING FUNCTION OR COFACTOR REQUIREMENT (structural or catalytic)	SUBCELLULAR LOCALIZATION	10029	0	PROTEIN WITH BINDING FUNCTION OR COFACTOR REQUIREMENT (structural or catalytic)	9118	1
mc12000077	PROTEIN WITH BINDING FUNCTION OR COFACTOR REQUIREMENT (structural or catalytic);CELLULAR COMMUNICATION/SIGNAL TRANSDUCTION MECHANISM;CELL TYPE DIFFERENTIATION	SUBCELLULAR LOCALIZATION	9943	0	PROTEIN WITH BINDING FUNCTION OR COFACTOR REQUIREMENT (structural or catalytic)	7300	1
mc3001199	PROTEIN WITH BINDING FUNCTION OR COFACTOR REQUIREMENT (structural or catalytic)	SUBCELLULAR LOCALIZATION	9666	0	PROTEIN WITH BINDING FUNCTION OR COFACTOR REQUIREMENT (structural or catalytic)	9204	1
mc16001331	METABOLISM	SUBCELLULAR LOCALIZATION	9178	0	METABOLISM	8422	1
mc9001941	CELL CYCLE AND DNA PROCESSING;CELL RESCUE DEFENSE AND VIRULENCE;SUBCELLULAR LOCALIZATION	PROTEIN WITH BINDING FUNCTION OR COFACTOR REQUIREMENT (structural or catalytic)	9119	0	SUBCELLULAR LOCALIZATION	7627	1
mc9001292	ENERGY;PROTEIN WITH BINDING FUNCTION OR COFACTOR REQUIREMENT (structural or catalytic);CELLULAR TRANSPORT TRANSPORT FACILITIES AND TRANSPORT ROUTES	SUBCELLULAR LOCALIZATION	8747	0	PROTEIN WITH BINDING FUNCTION OR COFACTOR REQUIREMENT (structural or catalytic)	6927	1
mc2000062	METABOLISM;PROTEIN WITH BINDING FUNCTION OR COFACTOR REQUIREMENT (structural or catalytic)	SUBCELLULAR LOCALIZATION	8527	0	PROTEIN WITH BINDING FUNCTION OR COFACTOR REQUIREMENT (structural or catalytic)	7522	1
mc14000863	METABOLISM;CELL CYCLE AND DNA PROCESSING;PROTEIN WITH BINDING FUNCTION OR COFACTOR REQUIREMENT (structural or catalytic);CELLULAR TRANSPORT TRANSPORT FACILITIES AND TRANSPORT ROUTES;SYSTEMIC INTERACTION WITH THE ENVIRONMENT	SUBCELLULAR LOCALIZATION	8509	0	PROTEIN WITH BINDING FUNCTION OR COFACTOR REQUIREMENT (structural or catalytic)	6544	1
mc2000861	CELL CYCLE AND DNA PROCESSING;CELL RESCUE DEFENSE AND VIRULENCE;BIOGENESIS OF CELLULAR COMPONENTS;SUBCELLULAR LOCALIZATION	PROTEIN WITH BINDING FUNCTION OR COFACTOR REQUIREMENT (structural or catalytic)	8351	0	SUBCELLULAR LOCALIZATION	5823	1
mc6000048	PROTEIN FATE (folding modification destination);PROTEIN WITH BINDING FUNCTION OR COFACTOR REQUIREMENT (structural or catalytic)	SUBCELLULAR LOCALIZATION	8172	0	PROTEIN WITH BINDING FUNCTION OR COFACTOR REQUIREMENT (structural or catalytic)	7138	1
mc12000200	TRANSCRIPTION;PROTEIN WITH BINDING FUNCTION OR COFACTOR REQUIREMENT (structural or catalytic)	SUBCELLULAR LOCALIZATION	7610	0	PROTEIN WITH BINDING FUNCTION OR COFACTOR REQUIREMENT (structural or catalytic)	6736	1
mc18000740	PROTEIN SYNTHESIS;PROTEIN WITH BINDING FUNCTION OR COFACTOR REQUIREMENT (structural or catalytic);CELLULAR TRANSPORT TRANSPORT FACILITIES AND TRANSPORT ROUTES	SUBCELLULAR LOCALIZATION	7377	0	PROTEIN WITH BINDING FUNCTION OR COFACTOR REQUIREMENT (structural or catalytic)	2874	1
mc11001295	PROTEIN FATE (folding modification destination);PROTEIN WITH BINDING FUNCTION OR COFACTOR REQUIREMENT (structural or catalytic)	SUBCELLULAR LOCALIZATION	7157	0	PROTEIN WITH BINDING FUNCTION OR COFACTOR REQUIREMENT (structural or catalytic)	5289	1
mc19000981	PROTEIN FATE (folding modification destination);PROTEIN WITH BINDING FUNCTION OR COFACTOR REQUIREMENT (structural or catalytic);CELLULAR TRANSPORT TRANSPORT FACILITIES AND TRANSPORT ROUTES;BIOGENESIS OF CELLULAR COMPONENTS;CELL TYPE DIFFERENTIATION	SUBCELLULAR LOCALIZATION	7005	0	PROTEIN WITH BINDING FUNCTION OR COFACTOR REQUIREMENT (structural or catalytic)	6994	1
mc17000789	SUBCELLULAR LOCALIZATION	PROTEIN WITH BINDING FUNCTION OR COFACTOR REQUIREMENT (structural or catalytic)	6894	0	SUBCELLULAR LOCALIZATION	5941	1
mc4002391	PROTEIN FATE (folding modification destination);PROTEIN WITH BINDING FUNCTION OR COFACTOR REQUIREMENT (structural or catalytic)	SUBCELLULAR LOCALIZATION	6874	0	PROTEIN WITH BINDING FUNCTION OR COFACTOR REQUIREMENT (structural or catalytic)	6586	1
mc14000499	METABOLISM;PROTEIN WITH BINDING FUNCTION OR COFACTOR REQUIREMENT (structural or catalytic)	SUBCELLULAR LOCALIZATION	6849	0	PROTEIN WITH BINDING FUNCTION OR COFACTOR REQUIREMENT (structural or catalytic)	6504	1
mc12000691	SUBCELLULAR LOCALIZATION	PROTEIN WITH BINDING FUNCTION OR COFACTOR REQUIREMENT (structural or catalytic)	6250	0	SUBCELLULAR LOCALIZATION	4514	1
mc18000427	PROTEIN WITH BINDING FUNCTION OR COFACTOR REQUIREMENT (structural or catalytic)	SUBCELLULAR LOCALIZATION	5963	0	PROTEIN WITH BINDING FUNCTION OR COFACTOR REQUIREMENT (structural or catalytic)	4902	1
mc16000142	TRANSCRIPTION;PROTEIN WITH BINDING FUNCTION OR COFACTOR REQUIREMENT (structural or catalytic);CELL FATE	SUBCELLULAR LOCALIZATION	5004	0	PROTEIN WITH BINDING FUNCTION OR COFACTOR REQUIREMENT (structural or catalytic)	4319	1
mc11000067	PROTEIN WITH BINDING FUNCTION OR COFACTOR REQUIREMENT (structural or catalytic);CELL TYPE DIFFERENTIATION	SUBCELLULAR LOCALIZATION	3509	0	PROTEIN WITH BINDING FUNCTION OR COFACTOR REQUIREMENT (structural or catalytic)	3441	1
mc1001293	METABOLISM;PROTEIN WITH BINDING FUNCTION OR COFACTOR REQUIREMENT (structural or catalytic)	SUBCELLULAR LOCALIZATION	3447	0	PROTEIN WITH BINDING FUNCTION OR COFACTOR REQUIREMENT (structural or catalytic)	2477	1
mc5000925	CELLULAR TRANSPORT TRANSPORT FACILITIES AND TRANSPORT ROUTES;SUBCELLULAR LOCALIZATION	PROTEIN WITH BINDING FUNCTION OR COFACTOR REQUIREMENT (structural or catalytic)	3432	0	SUBCELLULAR LOCALIZATION	3294	1
mc15000541	CELL CYCLE AND DNA PROCESSING;PROTEIN WITH BINDING FUNCTION OR COFACTOR REQUIREMENT (structural or catalytic);CELL FATE	SUBCELLULAR LOCALIZATION	3069	0	PROTEIN WITH BINDING FUNCTION OR COFACTOR REQUIREMENT (structural or catalytic)	2476	1
mc17001166	METABOLISM;SUBCELLULAR LOCALIZATION	PROTEIN WITH BINDING FUNCTION OR COFACTOR REQUIREMENT (structural or catalytic)	2802	0	SUBCELLULAR LOCALIZATION	2389	1
mc2002889	METABOLISM;PROTEIN WITH BINDING FUNCTION OR COFACTOR REQUIREMENT (structural or catalytic)	SUBCELLULAR LOCALIZATION	2714	0	PROTEIN WITH BINDING FUNCTION OR COFACTOR REQUIREMENT (structural or catalytic)	2116	1
mc14000799	PROTEIN WITH BINDING FUNCTION OR COFACTOR REQUIREMENT (structural or catalytic)	SUBCELLULAR LOCALIZATION	2252	0	PROTEIN WITH BINDING FUNCTION OR COFACTOR REQUIREMENT (structural or catalytic)	2158	1
mc15000867	TRANSCRIPTION;SUBCELLULAR LOCALIZATION	PROTEIN WITH BINDING FUNCTION OR COFACTOR REQUIREMENT (structural or catalytic)	1880	0	SUBCELLULAR LOCALIZATION	1561	1
mcx000108	CELLULAR TRANSPORT TRANSPORT FACILITIES AND TRANSPORT ROUTES;SUBCELLULAR LOCALIZATION	PROTEIN WITH BINDING FUNCTION OR COFACTOR REQUIREMENT (structural or catalytic)	1849	0	SUBCELLULAR LOCALIZATION	1849	1
mc3001244	PROTEIN WITH BINDING FUNCTION OR COFACTOR REQUIREMENT (structural or catalytic)	SUBCELLULAR LOCALIZATION	1470	0	PROTEIN WITH BINDING FUNCTION OR COFACTOR REQUIREMENT (structural or catalytic)	1377	1
mc19000070	CELL CYCLE AND DNA PROCESSING;SUBCELLULAR LOCALIZATION	PROTEIN WITH BINDING FUNCTION OR COFACTOR REQUIREMENT (structural or catalytic)	1393	0	SUBCELLULAR LOCALIZATION	1372	1
mc5001662	CELL FATE	SUBCELLULAR LOCALIZATION	1105	0	CELL FATE	751	1
mc7000737	PROTEIN WITH BINDING FUNCTION OR COFACTOR REQUIREMENT (structural or catalytic)	SUBCELLULAR LOCALIZATION	964	0	PROTEIN WITH BINDING FUNCTION OR COFACTOR REQUIREMENT (structural or catalytic)	725	1
mc4002280	METABOLISM;PROTEIN WITH BINDING FUNCTION OR COFACTOR REQUIREMENT (structural or catalytic)	SUBCELLULAR LOCALIZATION	470	0	PROTEIN WITH BINDING FUNCTION OR COFACTOR REQUIREMENT (structural or catalytic)	420	1

## Sheet: PseAAC-based approach
mc	functions	1st prediction	1st score	1st flag	2nd prediction	2nd score	2nd flag
mc2000258	METABOLISM;PROTEIN WITH BINDING FUNCTION OR COFACTOR REQUIREMENT (structural or catalytic)	SUBCELLULAR LOCALIZATION	8168.45	0	PROTEIN WITH BINDING FUNCTION OR COFACTOR REQUIREMENT (structural or catalytic)	7075.76	1
mc5000093	PROTEIN WITH BINDING FUNCTION OR COFACTOR REQUIREMENT (structural or catalytic);BIOGENESIS OF CELLULAR COMPONENTS	SUBCELLULAR LOCALIZATION	8166.47	0	PROTEIN WITH BINDING FUNCTION OR COFACTOR REQUIREMENT (structural or catalytic)	7078.19	1
mc17000542	PROTEIN WITH BINDING FUNCTION OR COFACTOR REQUIREMENT (structural or catalytic)	SUBCELLULAR LOCALIZATION	8165.26	0	PROTEIN WITH BINDING FUNCTION OR COFACTOR REQUIREMENT (structural or catalytic)	7074.79	1
mc8001253	METABOLISM;CELL CYCLE AND DNA PROCESSING;PROTEIN WITH BINDING FUNCTION OR COFACTOR REQUIREMENT (structural or catalytic)	SUBCELLULAR LOCALIZATION	8147.52	0	PROTEIN WITH BINDING FUNCTION OR COFACTOR REQUIREMENT (structural or catalytic)	7064.76	1
mc19000274	PROTEIN WITH BINDING FUNCTION OR COFACTOR REQUIREMENT (structural or catalytic)	SUBCELLULAR LOCALIZATION	8144.6	0	PROTEIN WITH BINDING FUNCTION OR COFACTOR REQUIREMENT (structural or catalytic)	7066.83	1
mc5000792	PROTEIN WITH BINDING FUNCTION OR COFACTOR REQUIREMENT (structural or catalytic)	SUBCELLULAR LOCALIZATION	8141.05	0	PROTEIN WITH BINDING FUNCTION OR COFACTOR REQUIREMENT (structural or catalytic)	7066.44	1
mc7001042	PROTEIN FATE (folding modification destination);PROTEIN WITH BINDING FUNCTION OR COFACTOR REQUIREMENT (structural or catalytic);CELLULAR TRANSPORT TRANSPORT FACILITIES AND TRANSPORT ROUTES;BIOGENESIS OF CELLULAR COMPONENTS;CELL TYPE DIFFERENTIATION	SUBCELLULAR LOCALIZATION	8137.37	0	PROTEIN WITH BINDING FUNCTION OR COFACTOR REQUIREMENT (structural or catalytic)	7050.32	1
mc3001821	METABOLISM;PROTEIN WITH BINDING FUNCTION OR COFACTOR REQUIREMENT (structural or catalytic)	SUBCELLULAR LOCALIZATION	8135.74	0	PROTEIN WITH BINDING FUNCTION OR COFACTOR REQUIREMENT (structural or catalytic)	7056.33	1
mc6001686	PROTEIN WITH BINDING FUNCTION OR COFACTOR REQUIREMENT (structural or catalytic)	SUBCELLULAR LOCALIZATION	8108.21	0	PROTEIN WITH BINDING FUNCTION OR COFACTOR REQUIREMENT (structural or catalytic)	7030.94	1
mc2000153	METABOLISM;PROTEIN WITH BINDING FUNCTION OR COFACTOR REQUIREMENT (structural or catalytic)	SUBCELLULAR LOCALIZATION	8105.61	0	PROTEIN WITH BINDING FUNCTION OR COFACTOR REQUIREMENT (structural or catalytic)	7021.56	1
mc16000606	PROTEIN WITH BINDING FUNCTION OR COFACTOR REQUIREMENT (structural or catalytic)	SUBCELLULAR LOCALIZATION	8102.24	0	PROTEIN WITH BINDING FUNCTION OR COFACTOR REQUIREMENT (structural or catalytic)	7019.02	1
mc4001960	PROTEIN WITH BINDING FUNCTION OR COFACTOR REQUIREMENT (structural or catalytic);TISSUE DIFFERENTIATION	SUBCELLULAR LOCALIZATION	8085.68	0	PROTEIN WITH BINDING FUNCTION OR COFACTOR REQUIREMENT (structural or catalytic)	7007.22	1
mc7002722	METABOLISM;PROTEIN FATE (folding modification destination);PROTEIN WITH BINDING FUNCTION OR COFACTOR REQUIREMENT (structural or catalytic);REGULATION OF METABOLISM AND PROTEIN FUNCTION;CELLULAR COMMUNICATION/SIGNAL TRANSDUCTION MECHANISM	SUBCELLULAR LOCALIZATION	8072.71	0	PROTEIN WITH BINDING FUNCTION OR COFACTOR REQUIREMENT (structural or catalytic)	7004.1	1
mc2002103	PROTEIN WITH BINDING FUNCTION OR COFACTOR REQUIREMENT (structural or catalytic)	SUBCELLULAR LOCALIZATION	8067.5	0	PROTEIN WITH BINDING FUNCTION OR COFACTOR REQUIREMENT (structural or catalytic)	6980.46	1
mc6002265	PROTEIN WITH BINDING FUNCTION OR COFACTOR REQUIREMENT (structural or catalytic);REGULATION OF METABOLISM AND PROTEIN FUNCTION	SUBCELLULAR LOCALIZATION	8059.9	0	PROTEIN WITH BINDING FUNCTION OR COFACTOR REQUIREMENT (structural or catalytic)	6964.23	1
mc19000182	METABOLISM;PROTEIN FATE (folding modification destination);PROTEIN WITH BINDING FUNCTION OR COFACTOR REQUIREMENT (structural or catalytic)	SUBCELLULAR LOCALIZATION	8053.43	0	PROTEIN WITH BINDING FUNCTION OR COFACTOR REQUIREMENT (structural or catalytic)	6976.21	1
mc4002564	PROTEIN WITH BINDING FUNCTION OR COFACTOR REQUIREMENT (structural or catalytic)	SUBCELLULAR LOCALIZATION	8053.2	0	PROTEIN WITH BINDING FUNCTION OR COFACTOR REQUIREMENT (structural or catalytic)	6974.96	1
mc3001065	PROTEIN WITH BINDING FUNCTION OR COFACTOR REQUIREMENT (structural or catalytic)	SUBCELLULAR LOCALIZATION	8046.06	0	PROTEIN WITH BINDING FUNCTION OR COFACTOR REQUIREMENT (structural or catalytic)	6983.59	1
mc17000646	TRANSCRIPTION;PROTEIN WITH BINDING FUNCTION OR COFACTOR REQUIREMENT (structural or catalytic);REGULATION OF METABOLISM AND PROTEIN FUNCTION;CELL RESCUE DEFENSE AND VIRULENCE;ORGAN LOCALIZATION	SUBCELLULAR LOCALIZATION	8036.75	0	PROTEIN WITH BINDING FUNCTION OR COFACTOR REQUIREMENT (structural or catalytic)	6963.66	1
mc4000691	PROTEIN FATE (folding modification destination);PROTEIN WITH BINDING FUNCTION OR COFACTOR REQUIREMENT (structural or catalytic);REGULATION OF METABOLISM AND PROTEIN FUNCTION;CELLULAR COMMUNICATION/SIGNAL TRANSDUCTION MECHANISM	SUBCELLULAR LOCALIZATION	8030.75	0	PROTEIN WITH BINDING FUNCTION OR COFACTOR REQUIREMENT (structural or catalytic)	6978.99	1
mc1001126	PROTEIN FATE (folding modification destination);PROTEIN WITH BINDING FUNCTION OR COFACTOR REQUIREMENT (structural or catalytic);REGULATION OF METABOLISM AND PROTEIN FUNCTION	SUBCELLULAR LOCALIZATION	8024.28	0	PROTEIN WITH BINDING FUNCTION OR COFACTOR REQUIREMENT (structural or catalytic)	6968.12	1
mc5001607	PROTEIN WITH BINDING FUNCTION OR COFACTOR REQUIREMENT (structural or catalytic)	SUBCELLULAR LOCALIZATION	7990.22	0	PROTEIN WITH BINDING FUNCTION OR COFACTOR REQUIREMENT (structural or catalytic)	6927.59	1
mc1001542	PROTEIN WITH BINDING FUNCTION OR COFACTOR REQUIREMENT (structural or catalytic)	SUBCELLULAR LOCALIZATION	7979.92	0	PROTEIN WITH BINDING FUNCTION OR COFACTOR REQUIREMENT (structural or catalytic)	6927.51	1
mc10000066	PROTEIN FATE (folding modification destination);PROTEIN WITH BINDING FUNCTION OR COFACTOR REQUIREMENT (structural or catalytic);REGULATION OF METABOLISM AND PROTEIN FUNCTION;CELLULAR COMMUNICATION/SIGNAL TRANSDUCTION MECHANISM	SUBCELLULAR LOCALIZATION	7974.4	0	PROTEIN WITH BINDING FUNCTION OR COFACTOR REQUIREMENT (structural or catalytic)	6914.06	1
mc3001141	PROTEIN WITH BINDING FUNCTION OR COFACTOR REQUIREMENT (structural or catalytic);CELLULAR TRANSPORT TRANSPORT FACILITIES AND TRANSPORT ROUTES	SUBCELLULAR LOCALIZATION	7948.24	0	PROTEIN WITH BINDING FUNCTION OR COFACTOR REQUIREMENT (structural or catalytic)	6887.41	1
mc13000595	PROTEIN WITH BINDING FUNCTION OR COFACTOR REQUIREMENT (structural or catalytic);CELLULAR TRANSPORT TRANSPORT FACILITIES AND TRANSPORT ROUTES;SYSTEMIC INTERACTION WITH THE ENVIRONMENT;BIOGENESIS OF CELLULAR COMPONENTS;CELL TYPE DIFFERENTIATION	SUBCELLULAR LOCALIZATION	7939.6	0	PROTEIN WITH BINDING FUNCTION OR COFACTOR REQUIREMENT (structural or catalytic)	6896.39	1
mc14000646	METABOLISM;PROTEIN WITH BINDING FUNCTION OR COFACTOR REQUIREMENT (structural or catalytic)	SUBCELLULAR LOCALIZATION	7930.22	0	PROTEIN WITH BINDING FUNCTION OR COFACTOR REQUIREMENT (structural or catalytic)	6875.03	1
mc6001618	PROTEIN WITH BINDING FUNCTION OR COFACTOR REQUIREMENT (structural or catalytic);REGULATION OF METABOLISM AND PROTEIN FUNCTION	SUBCELLULAR LOCALIZATION	7916.87	0	PROTEIN WITH BINDING FUNCTION OR COFACTOR REQUIREMENT (structural or catalytic)	6861.12	1
mc11000580	PROTEIN WITH BINDING FUNCTION OR COFACTOR REQUIREMENT (structural or catalytic)	SUBCELLULAR LOCALIZATION	7912.52	0	PROTEIN WITH BINDING FUNCTION OR COFACTOR REQUIREMENT (structural or catalytic)	6886.46	1
mc13000103	PROTEIN WITH BINDING FUNCTION OR COFACTOR REQUIREMENT (structural or catalytic);CELLULAR COMMUNICATION/SIGNAL TRANSDUCTION MECHANISM;CELL FATE;DEVELOPMENT (Systemic);ORGAN DIFFERENTIATION	SUBCELLULAR LOCALIZATION	7911.03	0	PROTEIN WITH BINDING FUNCTION OR COFACTOR REQUIREMENT (structural or catalytic)	6869.72	1
mc12000726	PROTEIN WITH BINDING FUNCTION OR COFACTOR REQUIREMENT (structural or catalytic)	SUBCELLULAR LOCALIZATION	7910.99	0	PROTEIN WITH BINDING FUNCTION OR COFACTOR REQUIREMENT (structural or catalytic)	6854	1
mc8001443	PROTEIN WITH BINDING FUNCTION OR COFACTOR REQUIREMENT (structural or catalytic);CELLULAR COMMUNICATION/SIGNAL TRANSDUCTION MECHANISM	SUBCELLULAR LOCALIZATION	7897.41	0	PROTEIN WITH BINDING FUNCTION OR COFACTOR REQUIREMENT (structural or catalytic)	6848.15	1
mc1001242	PROTEIN FATE (folding modification destination);PROTEIN WITH BINDING FUNCTION OR COFACTOR REQUIREMENT (structural or catalytic)	SUBCELLULAR LOCALIZATION	7885.76	0	PROTEIN WITH BINDING FUNCTION OR COFACTOR REQUIREMENT (structural or catalytic)	6864.38	1
mc1001669	PROTEIN WITH BINDING FUNCTION OR COFACTOR REQUIREMENT (structural or catalytic);CELLULAR COMMUNICATION/SIGNAL TRANSDUCTION MECHANISM;INTERACTION WITH THE ENVIRONMENT;CELL FATE	SUBCELLULAR LOCALIZATION	7857.03	0	PROTEIN WITH BINDING FUNCTION OR COFACTOR REQUIREMENT (structural or catalytic)	6809.57	1
mc7002385	PROTEIN WITH BINDING FUNCTION OR COFACTOR REQUIREMENT (structural or catalytic)	SUBCELLULAR LOCALIZATION	7855.58	0	PROTEIN WITH BINDING FUNCTION OR COFACTOR REQUIREMENT (structural or catalytic)	6802.32	1
mc10001958	PROTEIN WITH BINDING FUNCTION OR COFACTOR REQUIREMENT (structural or catalytic);CELLULAR TRANSPORT TRANSPORT FACILITIES AND TRANSPORT ROUTES;BIOGENESIS OF CELLULAR COMPONENTS;CELL TYPE DIFFERENTIATION	SUBCELLULAR LOCALIZATION	7817.15	0	PROTEIN WITH BINDING FUNCTION OR COFACTOR REQUIREMENT (structural or catalytic)	6781.62	1
mc4001252	PROTEIN WITH BINDING FUNCTION OR COFACTOR REQUIREMENT (structural or catalytic);REGULATION OF METABOLISM AND PROTEIN FUNCTION;CELLULAR COMMUNICATION/SIGNAL TRANSDUCTION MECHANISM;INTERACTION WITH THE ENVIRONMENT;CELL FATE;DEVELOPMENT (Systemic)	SUBCELLULAR LOCALIZATION	7792.25	0	PROTEIN WITH BINDING FUNCTION OR COFACTOR REQUIREMENT (structural or catalytic)	6758.67	1
mc6001777	TRANSCRIPTION;PROTEIN WITH BINDING FUNCTION OR COFACTOR REQUIREMENT (structural or catalytic)	SUBCELLULAR LOCALIZATION	7783.84	0	PROTEIN WITH BINDING FUNCTION OR COFACTOR REQUIREMENT (structural or catalytic)	6733.91	1
mc19000516	PROTEIN WITH BINDING FUNCTION OR COFACTOR REQUIREMENT (structural or catalytic)	SUBCELLULAR LOCALIZATION	7771.53	0	PROTEIN WITH BINDING FUNCTION OR COFACTOR REQUIREMENT (structural or catalytic)	6737.59	1
mc7002801	PROTEIN WITH BINDING FUNCTION OR COFACTOR REQUIREMENT (structural or catalytic);ORGAN LOCALIZATION	SUBCELLULAR LOCALIZATION	7767.36	0	PROTEIN WITH BINDING FUNCTION OR COFACTOR REQUIREMENT (structural or catalytic)	6723.98	1
mc2003394	PROTEIN WITH BINDING FUNCTION OR COFACTOR REQUIREMENT (structural or catalytic)	SUBCELLULAR LOCALIZATION	7729.76	0	PROTEIN WITH BINDING FUNCTION OR COFACTOR REQUIREMENT (structural or catalytic)	6679.16	1
mc19000075	PROTEIN WITH BINDING FUNCTION OR COFACTOR REQUIREMENT (structural or catalytic)	SUBCELLULAR LOCALIZATION	7729.07	0	PROTEIN WITH BINDING FUNCTION OR COFACTOR REQUIREMENT (structural or catalytic)	6698.79	1
mc14001045	PROTEIN WITH BINDING FUNCTION OR COFACTOR REQUIREMENT (structural or catalytic);CELLULAR TRANSPORT TRANSPORT FACILITIES AND TRANSPORT ROUTES	SUBCELLULAR LOCALIZATION	7722.93	0	PROTEIN WITH BINDING FUNCTION OR COFACTOR REQUIREMENT (structural or catalytic)	6684.56	1
mc5000092	PROTEIN WITH BINDING FUNCTION OR COFACTOR REQUIREMENT (structural or catalytic);BIOGENESIS OF CELLULAR COMPONENTS	SUBCELLULAR LOCALIZATION	7721.39	0	PROTEIN WITH BINDING FUNCTION OR COFACTOR REQUIREMENT (structural or catalytic)	6672.3	1
mc14000251	PROTEIN FATE (folding modification destination);PROTEIN WITH BINDING FUNCTION OR COFACTOR REQUIREMENT (structural or catalytic);CELL RESCUE DEFENSE AND VIRULENCE	SUBCELLULAR LOCALIZATION	7709.49	0	PROTEIN WITH BINDING FUNCTION OR COFACTOR REQUIREMENT (structural or catalytic)	6699.19	1
mc6001278	PROTEIN WITH BINDING FUNCTION OR COFACTOR REQUIREMENT (structural or catalytic)	SUBCELLULAR LOCALIZATION	7670.32	0	PROTEIN WITH BINDING FUNCTION OR COFACTOR REQUIREMENT (structural or catalytic)	6651.65	1
mc4000485	PROTEIN WITH BINDING FUNCTION OR COFACTOR REQUIREMENT (structural or catalytic)	SUBCELLULAR LOCALIZATION	7608.61	0	PROTEIN WITH BINDING FUNCTION OR COFACTOR REQUIREMENT (structural or catalytic)	6623.27	1
mc4002019	PROTEIN WITH BINDING FUNCTION OR COFACTOR REQUIREMENT (structural or catalytic)	SUBCELLULAR LOCALIZATION	7501.54	0	PROTEIN WITH BINDING FUNCTION OR COFACTOR REQUIREMENT (structural or catalytic)	6507.77	1
mc16001364	PROTEIN WITH BINDING FUNCTION OR COFACTOR REQUIREMENT (structural or catalytic)	SUBCELLULAR LOCALIZATION	7407.5	0	PROTEIN WITH BINDING FUNCTION OR COFACTOR REQUIREMENT (structural or catalytic)	6454.99	1
mc5002421	METABOLISM;PROTEIN FATE (folding modification destination);PROTEIN WITH BINDING FUNCTION OR COFACTOR REQUIREMENT (structural or catalytic);CELLULAR COMMUNICATION/SIGNAL TRANSDUCTION MECHANISM	SUBCELLULAR LOCALIZATION	7201.28	0	PROTEIN WITH BINDING FUNCTION OR COFACTOR REQUIREMENT (structural or catalytic)	6202.2	1
